# Supplementary material for: Resolving the origins of secretory products and anthelmintic responses in a human parasitic nematode at single-cell resolution
Source: bioRxiv preprint, doi:10.1101/2022.08.30.505865, version 2 (2023-04-26)
Supplement: Fig1-D1 [file 505865_file10.docx]

date species stage measurement staining input total_cells viable_cells units notes

20201110 Bpa mf FACS draq5/dapi 300000 7505 1644

20201110 Bpa mf FACS draq5/dapi 120000000 17811 4536

20201110 Bpa mf CountessII draq5/dapi 300000 167000 8785 cells/mL pre-sort

20201110 Bpa mf CountessII draq5/dapi 120000000 1610000 29350 cells/mL pre-sort

20201110 Bpa mf CountessII draq5/dapi 300000 44000 0 cells/mL post-sort

20201110 Bpa mf CountessII draq5/dapi 120000000 88000 0 cells/mL post-sort

20201117 Bma mf FACS draq5/dapi 120000000 4040000 500000 cells/mL

20201117 Bma mf CountessII draq5/dapi 120000000 49800 49830 cells/mL post-sort

20201117 Bma mf hemocytometer NA 120000000 1870000 NA cells/mL

20201215 Bma mf CountessII NA 120000000 633000 NA cells/mL

20201215 Bma mf hemocytometer NA 120000000 2070000 NA cells/mL

20201215 Bma mf FACS draq5/dapi 120000000 669812 71292 cells/mL
