# Supplementary material for: Resolving the origins of secretory products and anthelmintic responses in a human parasitic nematode at single-cell resolution
Source: bioRxiv preprint, doi:10.1101/2022.08.30.505865, version 2 (2023-04-26)
Supplement: Fig6-D1 [file 505865_file28.csv]

gene_id	p_val	avg_log2FC	pct.1	pct.2	p_val_adj	Cluster	Gene.name	ID
WBGene00268299	2.13E-112	0.366330861	0.994	0.977	2.21E-108	1	Bm17156	Unannotated
WBGene00228775	1.90E-69	1.105587932	0.19	0.082	1.98E-65	1	Bm8514	Unannotated
WBGene00230037	5.44E-55	0.551223961	0.334	0.212	5.65E-51	1	Bm9776	Unannotated
WBGene00229641	4.03E-47	0.600669498	0.289	0.18	4.18E-43	1	Bma-srp-2	Unannotated
WBGene00224604	2.05E-38	0.935001935	0.103	0.042	2.13E-34	1	Bma-pat-10	Unannotated
WBGene00225831	1.48E-37	0.290807137	0.697	0.581	1.54E-33	1	Bma-tre-2	Unannotated
WBGene00230922	2.99E-36	0.71501515	0.165	0.089	3.11E-32	1	Bm10661	Unannotated
WBGene00220707	1.70E-33	0.56856781	0.167	0.094	1.76E-29	1	Bm446	Unannotated
WBGene00222262	2.98E-33	0.675992553	0.186	0.111	3.10E-29	1	Bm2001	Unannotated
WBGene00220387	1.30E-31	0.230643911	0.879	0.811	1.35E-27	1	Bm126	Unannotated
WBGene00233521	1.43E-30	0.766991977	0.112	0.055	1.49E-26	1	Bm13260	Unannotated
WBGene00220284	2.32E-29	0.427837242	0.319	0.219	2.41E-25	1	Bm23	Unannotated
WBGene00255710	4.48E-29	0.74933099	0.145	0.082	4.65E-25	1	Bm17068	Unannotated
WBGene00269140	1.76E-27	0.464770814	0.178	0.109	1.83E-23	1	Bm17998	Unannotated
WBGene00220489	1.87E-26	0.81096181	0.107	0.056	1.94E-22	1	Bm228	Unannotated
WBGene00220294	1.95E-26	0.19356081	0.973	0.956	2.02E-22	1	Bm33	Unannotated
WBGene00235061	2.30E-25	0.298646982	0.325	0.227	2.39E-21	1	Bma-rpl-36	Unannotated
WBGene00234335	1.37E-22	0.31030993	0.335	0.244	1.42E-18	1	Bm14074	Unannotated
WBGene00226306	2.30E-22	0.373763327	0.289	0.205	2.39E-18	1	Bm6045	Unannotated
WBGene00234345	2.66E-20	0.317095064	0.23	0.157	2.77E-16	1	Bma-rps-29	Unannotated
WBGene00224156	8.82E-19	0.227809471	0.267	0.187	9.16E-15	1	Bma-rps-21	Unannotated
WBGene00225415	2.96E-18	0.175907574	0.548	0.448	3.07E-14	1	Bma-nduo-4	Unannotated
WBGene00224479	9.71E-18	0.252463758	0.217	0.15	1.01E-13	1	Bm4218	Unannotated
WBGene00224889	3.77E-14	0.205851429	0.299	0.227	3.91E-10	1	Bm4628	Unannotated
WBGene00226308	1.75E-13	0.202996535	0.189	0.134	1.82E-09	1	Bm6047	Unannotated
WBGene00268657	3.20E-13	0.271751712	0.146	0.099	3.32E-09	1	Bm17514	Unannotated
WBGene00227210	3.52E-13	0.299775232	0.124	0.082	3.65E-09	1	Bm6949	Unannotated
WBGene00222969	1.23E-12	0.174978584	0.266	0.201	1.28E-08	1	Bma-rpl-34	Unannotated
WBGene00220425	1.33E-12	0.225928901	0.211	0.156	1.38E-08	1	Bm164	Unannotated
WBGene00233981	1.57E-12	0.171010489	0.173	0.122	1.63E-08	1	Bma-rpl-43	Unannotated
WBGene00234334	2.81E-12	0.159948135	0.383	0.304	2.92E-08	1	Bma-rpl-36.A	Unannotated
WBGene00228581	2.80E-11	0.217250832	0.111	0.074	2.91E-07	1	Bm8320	Unannotated
WBGene00223778	2.69E-10	0.156030015	0.164	0.119	2.79E-06	1	Bma-nars-1.4	Unannotated
WBGene00234342	4.36E-10	0.28290228	0.118	0.082	4.53E-06	1	Bma-rpl-38	Unannotated
WBGene00224386	4.79E-10	0.160264109	0.194	0.146	4.97E-06	1	Bm4125	Unannotated
WBGene00225169	7.21E-10	0.128758992	0.217	0.164	7.49E-06	1	Bma-gut-2	Unannotated
WBGene00220688	1.04E-09	0.136634686	0.22	0.168	1.08E-05	1	Bm427	Unannotated
WBGene00228757	1.13E-09	0.143443029	0.251	0.193	1.17E-05	1	Bm8496	Unannotated
WBGene00223531	2.46E-09	0.099742843	0.217	0.165	2.55E-05	1	Bma-rpl-33.1	Unannotated
WBGene00234329	2.50E-09	0.221238179	0.113	0.079	2.60E-05	1	Bm14068	Unannotated
WBGene00234268	2.92E-09	0.107441203	0.371	0.3	3.03E-05	1	Bm14007	Unannotated
WBGene00222088	4.55E-09	0.204457888	0.128	0.092	4.73E-05	1	Bma-moa-2	Unannotated
WBGene00223934	1.22E-08	0.182065421	0.152	0.114	0.00012626	1	Bma-rps-23.2	Unannotated
WBGene00224373	2.62E-08	-0.184768863	0.923	0.909	0.000271979	1	Bm4112	Unannotated
WBGene00228412	4.92E-08	0.139283108	0.112	0.08	0.000510478	1	Bm8151	Unannotated
WBGene00233242	6.59E-08	0.06936698	0.193	0.148	0.000684118	1	Bma-rpl-22.2	Unannotated
WBGene00229391	6.72E-08	0.056756501	0.214	0.166	0.000698042	1	Bma-ccch-1	Unannotated
WBGene00225572	8.03E-08	0.056388518	0.911	0.87	0.000834309	1	Bm5311	Unannotated
WBGene00234316	1.58E-07	0.124968465	0.125	0.092	0.001643482	1	Bm14055	Unannotated
WBGene00223116	1.87E-07	0.094441744	0.119	0.087	0.001940869	1	Bma-rsp-8	Unannotated
WBGene00225610	2.02E-07	0.092027928	0.325	0.266	0.00209428	1	Bma-rpl-28	Unannotated
WBGene00234326	2.29E-07	0.072164966	0.19	0.148	0.002376114	1	Bma-rpl-35	Unannotated
WBGene00225008	2.66E-07	0.080135112	0.446	0.374	0.002762732	1	Bma-rps-25	Unannotated
WBGene00234319	2.88E-07	0.104492794	0.141	0.106	0.002995889	1	Bma-rpb-6	Unannotated
WBGene00220669	3.40E-07	0.071466065	0.657	0.577	0.003528863	1	Bma-rpl-33.2	Unannotated
WBGene00220288	3.63E-07	0.187693509	0.11	0.081	0.003773946	1	Bm27	Unannotated
WBGene00230620	9.21E-07	0.038545389	0.483	0.405	0.009567954	1	Bma-rsp-5	Unannotated
WBGene00234044	9.70E-07	0.01817636	0.238	0.19	0.010075083	1	Bma-rps-15	Unannotated
WBGene00231031	1.21E-06	0.078203141	0.187	0.148	0.012514917	1	Bm10770	Unannotated
WBGene00226162	1.23E-06	0.125107332	0.119	0.089	0.012766829	1	Bma-cmd-1	Unannotated
WBGene00224998	1.47E-06	0.046917689	0.261	0.211	0.01525416	1	Bma-dph-3	Unannotated
WBGene00227522	1.75E-06	0.046857456	0.243	0.196	0.018201305	1	Bma-pab-1.1	Unannotated
WBGene00234343	1.88E-06	0.110545371	0.108	0.081	0.019524845	1	Bma-rps-28	Unannotated
WBGene00235014	2.20E-06	0.019038424	0.186	0.147	0.022811394	1	Bm14679	Unannotated
WBGene00221723	2.38E-06	-0.004442842	0.407	0.336	0.024734441	1	Bma-har-1	Unannotated
WBGene00234943	5.08E-06	0.053676525	0.121	0.092	0.052802729	1	Bm14758	Unannotated
WBGene00223985	5.34E-06	0.040292761	0.249	0.203	0.055466116	1	Bma-fkb-6	Unannotated
WBGene00222026	5.55E-06	0.057754375	0.522	0.449	0.057649243	1	Bma-rpl-23	Unannotated
WBGene00226511	8.23E-06	0.049286464	0.108	0.082	0.08544527	1	Bma-rpl-31	Unannotated
WBGene00229465	8.94E-06	0.03388199	0.146	0.115	0.092858257	1	Bm9204	Unannotated
WBGene00227131	9.52E-06	0.03662939	0.249	0.203	0.098906925	1	Bma-mif-1	Unannotated
WBGene00227700	1.05E-05	0.084777401	0.109	0.083	0.109211579	1	Bma-nol-16	Unannotated
WBGene00226496	1.59E-05	0.053186802	0.158	0.125	0.165562748	1	Bma-snr-2	Unannotated
WBGene00227738	2.68E-05	0.003355001	0.166	0.133	0.278681435	1	Bm7477	Unannotated
WBGene00233912	3.53E-05	0.000149966	0.171	0.138	0.366226205	1	Bma-ubq-2	Unannotated
WBGene00221312	3.54E-05	-0.025530887	0.193	0.156	0.368007433	1	Bm1051	Unannotated
WBGene00224756	4.73E-05	0.012232942	0.1	0.077	0.491069833	1	Bma-wbp-4	Unannotated
WBGene00224338	5.65E-05	0.008986298	0.126	0.099	0.587129583	1	Bma-nucb-1	Unannotated
WBGene00227855	5.71E-05	0.046308695	0.128	0.101	0.592799161	1	Bma-puf-12	Unannotated
WBGene00224042	5.76E-05	0.039591204	0.157	0.127	0.598222591	1	Bma-cey-1	Unannotated
WBGene00227265	6.43E-05	0.02035356	0.138	0.11	0.667882241	1	Bma-eel-1	Unannotated
WBGene00223023	7.40E-05	0.001785991	0.192	0.157	0.768524294	1	Bma-ssb-1	Unannotated
WBGene00224920	7.95E-05	0.043462429	0.116	0.092	0.825191123	1	Bm4659	Unannotated
WBGene00233980	8.02E-05	-0.01141776	0.348	0.292	0.832929738	1	Bma-rps-13	Unannotated
WBGene00224520	8.14E-05	0.035552028	0.165	0.134	0.845511615	1	Bma-ftt-2.2	Unannotated
WBGene00224273	8.91E-05	0.038570928	0.127	0.101	0.925207532	1	Bma-hrpa-1.2	Unannotated
WBGene00222671	8.91E-05	0.013427733	0.295	0.247	0.925243763	1	Bma-rps-30	Unannotated
WBGene00225788	9.06E-05	0.007375715	0.334	0.282	0.941056283	1	Bma-nifk-1	Unannotated
WBGene00222318	9.44E-05	0.008355271	0.13	0.104	0.980822698	1	Bm2057	Unannotated
WBGene00227498	0.000112616	-0.019808185	0.222	0.184	1	1	Bma-rps-20	Unannotated
WBGene00222714	0.000125163	-0.013865252	0.154	0.124	1	1	Bma-bcl-7	Unannotated
WBGene00222225	0.000141594	0.072735867	0.123	0.098	1	1	Bma-hyls-1	Unannotated
WBGene00227836	0.000149353	0.035105753	0.124	0.099	1	1	Bma-dpy-30	Unannotated
WBGene00223556	0.00015162	0.028534737	0.12	0.095	1	1	Bma-repo-1	Unannotated
WBGene00234332	0.000170862	-0.020005526	0.167	0.136	1	1	Bma-snr-4	Unannotated
WBGene00231173	0.000177472	0.010709274	0.156	0.127	1	1	Bm10912	Unannotated
WBGene00227249	0.000207337	-0.033351946	0.144	0.117	1	1	Bm6988	Unannotated
WBGene00222459	0.000212657	0.014979004	0.191	0.158	1	1	Bma-rpl-21	Unannotated
WBGene00222982	0.000259329	0.018893372	0.173	0.142	1	1	Bm2721	Unannotated
WBGene00224686	0.000277624	-0.027374761	0.314	0.265	1	1	Bm4425	Unannotated
WBGene00228283	0.000288735	-0.004091217	0.112	0.089	1	1	Bm8022	Unannotated
WBGene00224992	0.000294436	-0.030925742	0.163	0.134	1	1	Bma-ran-1	Unannotated
WBGene00225623	0.000337961	-0.00519062	0.202	0.169	1	1	Bma-mdt-15	Unannotated
WBGene00234310	0.000366393	0.021601299	0.538	0.473	1	1	Bma-rps-7	Unannotated
WBGene00224389	0.00037061	-0.016309179	0.248	0.208	1	1	Bma-ned-8	Unannotated
WBGene00231055	0.000413292	-0.022317364	0.102	0.081	1	1	Bma-iffb-1	Unannotated
WBGene00226673	0.000429829	0.087386488	0.121	0.099	1	1	Bma-crt-1	Unannotated
WBGene00233959	0.00049146	-0.017909652	0.228	0.19	1	1	Bma-hel-1	Unannotated
WBGene00225823	0.000550508	0.018223749	0.135	0.11	1	1	Bma-rad-50	Unannotated
WBGene00234046	0.000565926	0.0024614	0.184	0.154	1	1	Bma-abcf-2	Unannotated
WBGene00226632	0.000774632	-0.028424086	0.144	0.119	1	1	Bma-ccar-1	Unannotated
WBGene00227425	0.00079416	0.007811745	0.115	0.094	1	1	Bm7164	Unannotated
WBGene00234135	0.000829722	-0.038054355	0.137	0.113	1	1	Bma-fib-1	Unannotated
WBGene00234162	0.000855974	0.004190134	0.25	0.212	1	1	Bma-rps-16	Unannotated
WBGene00225126	0.000856276	-0.035465069	0.331	0.279	1	1	Bma-tos-1	Unannotated
WBGene00234289	0.00086808	0.004950232	0.684	0.617	1	1	Bma-rpl-16	Unannotated
WBGene00234032	0.000873762	-0.020669797	0.329	0.28	1	1	Bma-rpl-20	Unannotated
WBGene00231406	0.00088163	-0.029277321	0.104	0.084	1	1	Bma-ttx-7	Unannotated
WBGene00228007	0.000960223	0.027219411	0.106	0.087	1	1	Bm7746	Unannotated
WBGene00225895	0.001002631	-0.064009775	0.298	0.251	1	1	Bma-rps-24	Unannotated
WBGene00225280	0.001008965	0.023234233	0.117	0.096	1	1	Bm5019	Unannotated
WBGene00233924	0.001079902	-0.037411825	0.185	0.156	1	1	Bma-hsp-110	Unannotated
WBGene00226794	0.00113379	-0.017970985	0.233	0.198	1	1	Bma-rps-4	Unannotated
WBGene00234166	0.001336094	0.001500066	0.517	0.456	1	1	Bma-rla-1	Unannotated
WBGene00225960	0.001418784	-0.026101698	0.251	0.212	1	1	Bm5699	Unannotated
WBGene00235048	0.001421992	0.001453485	0.196	0.167	1	1	Bm14713	Unannotated
WBGene00223658	0.001523685	-0.038019609	0.181	0.152	1	1	Bm3397	Unannotated
WBGene00225275	0.00156045	0.051789311	0.107	0.088	1	1	Bm5014	Unannotated
WBGene00223293	0.001752265	-0.041677557	0.115	0.094	1	1	Bma-eat-3	Unannotated
WBGene00230764	0.001759124	0.018345309	0.136	0.114	1	1	Bm10503	Unannotated
WBGene00222474	0.001946869	0.012345033	0.117	0.097	1	1	Bma-popl-4	Unannotated
WBGene00234321	0.001970814	-0.018937716	0.112	0.092	1	1	Bma-rps-19.2	Unannotated
WBGene00234303	0.002103499	-0.044288989	0.257	0.219	1	1	Bma-rps-5	Unannotated
WBGene00222153	0.002147116	-0.031382212	0.138	0.115	1	1	Bma-ahsa-1	Unannotated
WBGene00234307	0.002249949	-0.024590754	0.314	0.269	1	1	Bma-rps-18	Unannotated
WBGene00223968	0.002525851	0.015163445	0.107	0.088	1	1	Bm3707	Unannotated
WBGene00225792	0.002544338	-0.042588892	0.132	0.11	1	1	Bma-sel-13	Unannotated
WBGene00234154	0.002596936	-0.041617821	0.277	0.237	1	1	Bma-rpl-24.1	Unannotated
WBGene00225680	0.00260146	0.018930579	0.101	0.083	1	1	Bma-pcf-11	Unannotated
WBGene00228445	0.002724436	-0.045322719	0.161	0.137	1	1	Bma-frm-1	Unannotated
WBGene00233918	0.002740979	-0.016746837	0.128	0.107	1	1	Bma-sar-1	Unannotated
WBGene00223592	0.002830113	-0.031950257	0.306	0.265	1	1	Bma-rpl-3	Unannotated
WBGene00225233	0.00307312	-0.045992011	0.142	0.119	1	1	Bma-spc-1	Unannotated
WBGene00226372	0.003288166	0.01832581	0.113	0.094	1	1	Bm6111	Unannotated
WBGene00233181	0.003366221	-0.023321814	0.384	0.332	1	1	Bm12920	Unannotated
WBGene00234163	0.003701601	-0.079384059	0.229	0.196	1	1	Bma-rps-22	Unannotated
WBGene00221966	0.003823991	-0.072850265	0.202	0.172	1	1	Bma-kin-3	Unannotated
WBGene00227298	0.003953102	-0.065908032	0.139	0.117	1	1	Bm7037	Unannotated
WBGene00222285	0.004586898	-0.037915464	0.265	0.228	1	1	Bm2024	Unannotated
WBGene00223999	0.004685879	-0.072711207	0.157	0.133	1	1	Bm3738	Unannotated
WBGene00234159	0.004743476	-0.024711507	0.382	0.33	1	1	Bm13898	Unannotated
WBGene00233923	0.004745144	-0.070847047	0.147	0.124	1	1	Bma-hsp-6	Unannotated
WBGene00224743	0.005014508	-0.074527242	0.107	0.089	1	1	Bma-vig-1	Unannotated
WBGene00234173	0.005141477	-0.088849035	0.124	0.104	1	1	Bma-snr-7	Unannotated
WBGene00221940	0.005159549	-0.043455738	0.12	0.101	1	1	Bma-trx-2	Unannotated
WBGene00226158	0.00526434	0.004412372	0.101	0.085	1	1	Bma-dhc-1	Unannotated
WBGene00225456	0.005697497	-0.022714488	0.48	0.42	1	1	Bm5195	Unannotated
WBGene00232772	0.006319901	-0.053434567	0.272	0.235	1	1	Bm12511	Unannotated
WBGene00227313	0.006325095	-0.060321893	0.201	0.174	1	1	Bma-pghm-1	Unannotated
WBGene00228481	0.007040013	-0.104025372	0.114	0.096	1	1	Bm8220	Unannotated
WBGene00222590	0.007271358	-0.044382455	0.14	0.119	1	1	Bma-cab-1	Unannotated
WBGene00223872	0.007578386	-0.063515639	0.366	0.32	1	1	Bma-hsp-1	Unannotated
WBGene00234177	0.007730332	-0.099121173	0.156	0.132	1	1	Bma-prp-8	Unannotated
WBGene00222581	0.008014385	-0.083490645	0.319	0.274	1	1	Bma-rps-3	Unannotated
WBGene00223894	0.008148002	-0.049993687	0.131	0.112	1	1	Bm3633	Unannotated
WBGene00234040	0.008158681	-0.031872893	0.547	0.479	1	1	Bma-rpl-32	Unannotated
WBGene00224994	0.009357984	-0.055031217	0.185	0.159	1	1	Bma-ben-1	Unannotated
WBGene00225639	0.010309877	-0.062484634	0.127	0.108	1	1	Bma-rpl-9	Unannotated
WBGene00268538	0.010353332	-0.133733676	0.131	0.11	1	1	Bma-rsp-3.2	Unannotated
WBGene00230633	0.013352159	-0.046253003	0.193	0.168	1	1	Bm10372	Unannotated
WBGene00231627	0.013988956	-0.070979736	0.213	0.186	1	1	Bm11366	Unannotated
WBGene00223487	0.014537487	-0.081612906	0.242	0.211	1	1	Bma-prdx-2	Unannotated
WBGene00223342	0.016878858	-0.099590498	0.133	0.114	1	1	Bm3081	Unannotated
WBGene00229500	0.017574563	-0.037508837	0.444	0.391	1	1	Bma-rpl-7A.3	Unannotated
WBGene00222701	0.018568937	-0.112468774	0.244	0.211	1	1	Bma-fust-1	Unannotated
WBGene00234314	0.018608191	-0.109493708	0.127	0.109	1	1	Bma-iscu-1	Unannotated
WBGene00234283	0.019113127	-0.078277636	0.137	0.118	1	1	Bm14022	Unannotated
WBGene00226908	0.019402712	-0.060520005	0.271	0.239	1	1	Bma-mrpl-20	Unannotated
WBGene00222121	0.019772382	-0.061012288	0.136	0.118	1	1	Bma-tads-1	Unannotated
WBGene00224191	0.019925872	-0.094759115	0.163	0.142	1	1	Bma-rps-26	Unannotated
WBGene00233961	0.021199575	-0.076866737	0.155	0.135	1	1	Bma-ddx-17	Unannotated
WBGene00228185	0.022813045	-0.064847413	0.14	0.122	1	1	Bm7924	Unannotated
WBGene00225258	0.023238272	-0.081154345	0.12	0.104	1	1	Bma-unc-70	Unannotated
WBGene00225549	0.024614682	-0.112874375	0.137	0.119	1	1	Bma-npp-21	Unannotated
WBGene00227295	0.024780767	-0.069036906	0.304	0.269	1	1	Bma-rpl-1	Unannotated
WBGene00222976	0.025724698	-0.105672886	0.167	0.145	1	1	Bma-acin-1	Unannotated
WBGene00226491	0.028587688	-0.086395263	0.154	0.136	1	1	Bma-lap-2	Unannotated
WBGene00234140	0.029240565	-0.123048129	0.102	0.087	1	1	Bm13879	Unannotated
WBGene00223825	0.029408883	-0.070145042	0.238	0.208	1	1	Bma-ubq-1	Unannotated
WBGene00222974	0.029539593	-0.073566493	0.102	0.088	1	1	Bma-apl-1	Unannotated
WBGene00229798	0.029702597	-0.133114182	0.1	0.086	1	1	Bma-npp-14	Unannotated
WBGene00223009	0.030140745	-0.112128714	0.164	0.143	1	1	Bm2748	Unannotated
WBGene00227337	0.031043847	-0.079486394	0.159	0.139	1	1	Bma-swsn-3	Unannotated
WBGene00234297	0.032786954	-0.085975844	0.18	0.157	1	1	Bm14036	Unannotated
WBGene00227218	0.037990617	-0.080046913	0.141	0.123	1	1	Bm6957	Unannotated
WBGene00232369	0.03931302	-0.025552484	0.372	0.333	1	1	Bma-cri-3	Unannotated
WBGene00231226	0.041233817	-0.130669611	0.177	0.155	1	1	Bm10965	Unannotated
WBGene00222619	0.043338452	-0.133943216	0.123	0.108	1	1	Bma-dao-5	Unannotated
WBGene00226546	0.043362343	-0.070907186	0.105	0.092	1	1	Bm6285	Unannotated
WBGene00233979	0.047725929	-0.088707275	0.237	0.21	1	1	Bm13718	Unannotated
WBGene00223932	0.052195393	-0.048733996	0.469	0.414	1	1	Bma-rpl-26	Unannotated
WBGene00224731	0.053017016	-0.112026002	0.106	0.092	1	1	Bma-mrps-16	Unannotated
WBGene00226935	0.057605906	-0.055225822	0.396	0.352	1	1	Bma-rpl-17	Unannotated
WBGene00224021	0.05799288	-0.113028499	0.12	0.106	1	1	Bma-fipp-1	Unannotated
WBGene00224611	0.060262508	-0.046780511	0.351	0.312	1	1	Bma-rpl-5	Unannotated
WBGene00223114	0.062549448	-0.046774079	0.403	0.36	1	1	Bma-rps-2.1	Unannotated
WBGene00225839	0.06485481	-0.120433292	0.16	0.142	1	1	Bma-cct-1	Unannotated
WBGene00222643	0.067969561	-0.107467175	0.115	0.101	1	1	Bma-mdt-26	Unannotated
WBGene00224965	0.069212077	-0.036093989	0.46	0.412	1	1	Bma-rpl-12	Unannotated
WBGene00234157	0.072919963	-0.049483872	0.336	0.301	1	1	Bma-rps-11	Unannotated
WBGene00223259	0.077449903	-0.074428466	0.315	0.282	1	1	Bma-rps-10	Unannotated
WBGene00230563	0.081822331	-0.236257609	0.4	0.375	1	1	Bm10302	Unannotated
WBGene00222214	0.083645901	-0.094407637	0.318	0.283	1	1	Bma-rpl-14	Unannotated
WBGene00226831	0.08386751	-0.050583176	0.47	0.423	1	1	Bma-rpl-18	Unannotated
WBGene00233929	0.084139543	-0.041717817	0.193	0.175	1	1	Bma-pbs-5	Unannotated
WBGene00226678	0.086272489	-0.167111365	0.106	0.093	1	1	Bma-prdx-6	Unannotated
WBGene00224797	0.087727415	-0.115513338	0.155	0.137	1	1	Bm4536	Unannotated
WBGene00233190	0.088942057	-0.101204838	0.178	0.16	1	1	Bma-rps-19.1	Unannotated
WBGene00224584	0.09096564	-0.065716604	0.264	0.237	1	1	Bma-rpl-7	Unannotated
WBGene00234300	0.093478028	-0.076623799	0.341	0.306	1	1	Bma-rps-8	Unannotated
WBGene00227848	0.093675787	-0.148982613	0.104	0.092	1	1	Bm7587	Unannotated
WBGene00225691	0.098996244	-0.081894322	0.34	0.303	1	1	Bma-rpl-6	Unannotated
WBGene00224811	0.114928338	-0.162247898	0.118	0.105	1	1	Bma-hrpr-1	Unannotated
WBGene00226075	0.117467784	-0.064230469	0.452	0.405	1	1	Bma-ekl-6	Unannotated
WBGene00234202	0.121438194	-0.155767267	0.258	0.229	1	1	Bma-rpl-2	Unannotated
WBGene00227461	0.125961515	-0.084366357	0.121	0.109	1	1	Bma-ubxn-2	Unannotated
WBGene00225573	0.126929616	-0.123483045	0.13	0.116	1	1	Bma-mag-1	Unannotated
WBGene00226588	0.134936383	-0.147503618	0.16	0.143	1	1	Bma-hsp-60	Unannotated
WBGene00227150	0.139963989	-0.154893281	0.135	0.121	1	1	Bma-pqn-87	Unannotated
WBGene00234306	0.174087795	-0.113663805	0.295	0.264	1	1	Bma-rps-9	Unannotated
WBGene00226904	0.174695916	-0.148894108	0.108	0.097	1	1	Bm6643	Unannotated
WBGene00234338	0.176696936	-0.178301899	0.151	0.135	1	1	Bma-snr-5	Unannotated
WBGene00223135	0.187591141	-0.159706208	0.178	0.161	1	1	Bm2874	Unannotated
WBGene00222349	0.190108833	-0.126934114	0.127	0.116	1	1	Bma-hsp-25	Unannotated
WBGene00229308	0.204096868	-0.125895825	0.11	0.1	1	1	Bm9047	Unannotated
WBGene00225936	0.204511207	-0.141069902	0.309	0.274	1	1	Bma-rps-17	Unannotated
WBGene00223467	0.216768235	-0.137723402	0.691	0.652	1	1	Bm3206	Unannotated
WBGene00227356	0.218826768	-0.150398306	0.514	0.474	1	1	Bma-sqd-1	Unannotated
WBGene00234029	0.259832434	-0.156372459	0.536	0.499	1	1	Bma-rla-0	Unannotated
WBGene00234176	0.290601647	-0.173428778	0.144	0.132	1	1	Bma-lsm-8	Unannotated
WBGene00223682	0.298941906	-0.150372309	0.139	0.127	1	1	Bma-eef-1G	Unannotated
WBGene00230220	0.3216698	-0.109714052	0.413	0.37	1	1	Bma-rps-23.1	Unannotated
WBGene00224751	0.327930441	-0.086704267	0.325	0.298	1	1	Bma-rps-1	Unannotated
WBGene00226014	0.333623027	-0.216698336	0.137	0.125	1	1	Bma-lin-59	Unannotated
WBGene00222356	0.335859536	-0.115207339	0.372	0.336	1	1	Bma-rpl-19	Unannotated
WBGene00224132	0.340570087	-0.208292949	0.124	0.114	1	1	Bma-rbpl-1	Unannotated
WBGene00234320	0.344863291	-0.07001239	0.618	0.569	1	1	Bma-rps-12	Unannotated
WBGene00234322	0.356777563	-0.116138586	0.136	0.126	1	1	Bma-rpl-27	Unannotated
WBGene00234011	0.371890372	-0.19646724	0.111	0.103	1	1	Bma-cnx-1	Unannotated
WBGene00234018	0.37954004	-0.14195577	0.137	0.127	1	1	Bma-rpt-1	Unannotated
WBGene00233982	0.438570826	-0.123671172	0.406	0.369	1	1	Bma-rps-14	Unannotated
WBGene00227549	0.44069192	-0.236978169	0.145	0.133	1	1	Bm7288	Unannotated
WBGene00233994	0.459174504	-0.171677824	0.111	0.104	1	1	Bma-eef-2	Unannotated
WBGene00226325	0.464746505	-0.267482195	0.102	0.095	1	1	Bm6064	Unannotated
WBGene00234143	0.466682554	-0.158228731	0.253	0.232	1	1	Bma-rps-6	Unannotated
WBGene00233949	0.510881138	-0.164106288	0.201	0.187	1	1	Bma-rack-1	Unannotated
WBGene00229489	0.523018665	-0.18378699	0.146	0.137	1	1	Bma-mec-12	Unannotated
WBGene00223328	0.552850875	-0.147624243	0.202	0.187	1	1	Bma-nap-1	Unannotated
WBGene00223735	0.596802718	-0.313285487	0.168	0.162	1	1	Bma-let-765	Unannotated
WBGene00221961	0.607936047	-0.155173547	0.339	0.31	1	1	Bma-rpl-4	Unannotated
WBGene00233914	0.610268318	-0.078037749	0.473	0.433	1	1	Bm13653	Unannotated
WBGene00234950	0.623359938	-0.286987959	0.123	0.122	1	1	Bm14765	Unannotated
WBGene00234035	0.635241321	-0.193959598	0.267	0.255	1	1	Bma-rpl-10.2	Unannotated
WBGene00234149	0.681226262	-0.09927799	0.427	0.391	1	1	Bma-rpl-15	Unannotated
WBGene00225405	0.693423276	-0.193973756	0.188	0.177	1	1	Bma-hil-1	Unannotated
WBGene00227404	0.733180931	-0.108126075	0.436	0.405	1	1	Bm7143	Unannotated
WBGene00223506	0.739716093	-0.208262126	0.233	0.22	1	1	Bm3245	Unannotated
WBGene00233925	0.774883299	-0.238083513	0.122	0.116	1	1	Bma-eif-3.G	Unannotated
WBGene00222044	0.794472663	-0.131011066	0.397	0.369	1	1	Bma-rps-0	Unannotated
WBGene00224533	0.865486343	-0.22975853	0.106	0.104	1	1	Bm4272	Unannotated
WBGene00234156	0.886690473	-0.070636411	0.786	0.746	1	1	Bma-tct-1	Unannotated
WBGene00234304	0.889677103	-0.12181146	0.431	0.396	1	1	Bma-rpl-13	Unannotated
WBGene00230037	3.56E-77	1.131731216	0.232	0.051	3.69E-73	2	Bm9776	MS
WBGene00229641	1.88E-72	1.053631496	0.245	0.062	1.96E-68	2	Bma-srp-2	MS
WBGene00228775	6.90E-71	1.212583884	0.173	0.025	7.17E-67	2	Bm8514	MS
WBGene00230922	2.17E-65	1.352785619	0.142	0.014	2.25E-61	2	Bm10661	MS
WBGene00255710	3.93E-56	1.042563281	0.141	0.021	4.09E-52	2	Bm17068	MS
WBGene00220489	1.50E-43	1.004380336	0.114	0.019	1.56E-39	2	Bm228	MS
WBGene00268299	5.00E-26	0.208670642	0.997	0.985	5.19E-22	2	Bm17156	MS
WBGene00222262	7.30E-26	0.800678755	0.13	0.048	7.58E-22	2	Bm2001	MS
WBGene00220707	2.98E-25	0.525920022	0.147	0.059	3.09E-21	2	Bm446	MS
WBGene00220284	3.31E-23	0.342912001	0.559	0.404	3.44E-19	2	Bm23	MS
WBGene00269140	3.72E-21	0.563667715	0.208	0.111	3.86E-17	2	Bm17998	MS
WBGene00220294	4.26E-20	0.239066009	0.984	0.983	4.42E-16	2	Bm33	MS
WBGene00235014	8.57E-18	0.366123157	0.365	0.244	8.89E-14	2	Bm14679	MS
WBGene00226306	4.89E-16	0.509749888	0.399	0.282	5.08E-12	2	Bm6045	MS
WBGene00220288	4.94E-16	0.463279203	0.221	0.131	5.13E-12	2	Bm27	MS
WBGene00222969	7.20E-16	0.305247425	0.448	0.325	7.48E-12	2	Bma-rpl-34	MS
WBGene00268657	1.70E-15	0.306014889	0.34	0.228	1.77E-11	2	Bm17514	MS
WBGene00234334	4.27E-15	0.208687671	0.658	0.53	4.43E-11	2	Bma-rpl-36.A	MS
WBGene00220619	6.24E-15	0.36045577	0.279	0.18	6.48E-11	2	Bm358	MS
WBGene00234345	7.58E-15	0.28557679	0.43	0.305	7.88E-11	2	Bma-rps-29	MS
WBGene00226543	7.73E-14	0.296214931	0.438	0.314	8.03E-10	2	Bm6282	MS
WBGene00224479	1.30E-13	0.222182294	0.423	0.303	1.35E-09	2	Bm4218	MS
WBGene00234335	2.11E-13	0.191666335	0.594	0.464	2.19E-09	2	Bm14074	MS
WBGene00224156	1.54E-12	0.247128845	0.522	0.394	1.60E-08	2	Bma-rps-21	MS
WBGene00234342	2.68E-12	0.235003915	0.292	0.198	2.78E-08	2	Bma-rpl-38	MS
WBGene00226308	1.07E-11	0.195529468	0.483	0.359	1.11E-07	2	Bm6047	MS
WBGene00234343	1.85E-11	0.174305672	0.254	0.166	1.92E-07	2	Bma-rps-28	MS
WBGene00230944	2.40E-11	0.357837124	0.146	0.086	2.49E-07	2	Bm10683	MS
WBGene00225644	2.77E-11	0.398256911	0.176	0.109	2.88E-07	2	Bma-sma-3	MS
WBGene00227138	2.78E-11	0.288416568	0.222	0.145	2.89E-07	2	Bm6877	MS
WBGene00222058	5.68E-11	0.401890187	0.131	0.076	5.90E-07	2	Bma-daf-7	MS
WBGene00234329	6.28E-11	0.189366871	0.393	0.282	6.53E-07	2	Bm14068	MS
WBGene00225572	9.35E-11	0.137993152	0.951	0.898	9.71E-07	2	Bm5311	MS
WBGene00220425	3.55E-10	0.151810551	0.449	0.337	3.68E-06	2	Bm164	MS
WBGene00231031	5.26E-10	0.157976784	0.205	0.134	5.46E-06	2	Bm10770	MS
WBGene00235061	5.94E-10	0.152287111	0.632	0.503	6.17E-06	2	Bma-rpl-36	MS
WBGene00225623	9.48E-10	0.193748519	0.334	0.245	9.84E-06	2	Bma-mdt-15	MS
WBGene00223989	1.06E-09	0.206773711	0.195	0.126	1.10E-05	2	Bm3728	MS
WBGene00233912	1.25E-09	0.171089749	0.405	0.301	1.30E-05	2	Bma-ubq-2	MS
WBGene00224386	1.60E-09	0.161840597	0.533	0.411	1.66E-05	2	Bm4125	MS
WBGene00223934	1.71E-09	0.194152079	0.343	0.25	1.78E-05	2	Bma-rps-23.2	MS
WBGene00222088	1.81E-09	0.174513208	0.296	0.21	1.88E-05	2	Bma-moa-2	MS
WBGene00223778	2.95E-09	0.307609825	0.268	0.193	3.06E-05	2	Bma-nars-1.4	MS
WBGene00233242	3.01E-09	0.179252291	0.41	0.31	3.12E-05	2	Bma-rpl-22.2	MS
WBGene00228379	1.18E-08	0.242698987	0.132	0.08	0.000122317	2	Bm8118	MS
WBGene00233981	1.18E-08	0.139137448	0.395	0.292	0.000122751	2	Bma-rpl-43	MS
WBGene00226501	1.32E-08	0.374046034	0.106	0.063	0.000137175	2	Bma-mlt-8	MS
WBGene00228105	1.35E-08	0.320288113	0.168	0.11	0.000139698	2	Bm7844	MS
WBGene00229133	1.96E-08	0.189685038	0.167	0.108	0.000203978	2	Bm8872	MS
WBGene00230930	2.45E-08	0.296294717	0.118	0.072	0.00025406	2	Bm10669	MS
WBGene00223116	3.38E-08	0.160884836	0.159	0.103	0.000350903	2	Bma-rsp-8	MS
WBGene00220688	3.40E-08	0.13459844	0.446	0.346	0.000353502	2	Bm427	MS
WBGene00223531	4.54E-08	0.127551683	0.469	0.361	0.000471116	2	Bma-rpl-33.1	MS
WBGene00224855	4.89E-08	0.14878819	0.183	0.123	0.000507654	2	Bma-cyn-4	MS
WBGene00226858	5.52E-08	0.154564799	0.135	0.085	0.000572894	2	Bma-rsks-1	MS
WBGene00222026	6.47E-08	0.101191643	0.788	0.704	0.000671674	2	Bma-rpl-23	MS
WBGene00223487	7.38E-08	0.138541908	0.414	0.318	0.000766216	2	Bma-prdx-2	MS
WBGene00225421	7.69E-08	0.144729336	0.181	0.122	0.00079847	2	Bm5160	MS
WBGene00224373	7.97E-08	0.097898603	0.874	0.785	0.000827726	2	Bm4112	MS
WBGene00222105	8.18E-08	0.108452143	0.224	0.156	0.000848995	2	Bma-rpl-29	MS
WBGene00234326	8.18E-08	0.143427148	0.472	0.368	0.000849505	2	Bma-rpl-35	MS
WBGene00226385	1.10E-07	0.162733912	0.132	0.084	0.001142719	2	Bm6124	MS
WBGene00221322	1.14E-07	0.282105549	0.101	0.06	0.001179576	2	Bm1061	MS
WBGene00225507	1.22E-07	0.212633868	0.114	0.07	0.001263127	2	Bma-trp-2	MS
WBGene00232369	1.38E-07	0.122640311	0.634	0.533	0.001437163	2	Bma-cri-3	MS
WBGene00227522	1.71E-07	0.083541886	0.394	0.301	0.00177093	2	Bma-pab-1.1	MS
WBGene00222590	1.96E-07	0.144283693	0.214	0.152	0.002033888	2	Bma-cab-1	MS
WBGene00226491	2.25E-07	0.167619119	0.284	0.219	0.002338524	2	Bma-lap-2	MS
WBGene00223725	2.72E-07	0.137844889	0.109	0.067	0.002821728	2	Bma-rbg-1	MS
WBGene00227404	3.12E-07	0.084405527	0.59	0.491	0.003244426	2	Bm7143	MS
WBGene00225280	3.46E-07	0.141665316	0.2	0.141	0.003597171	2	Bm5019	MS
WBGene00227781	3.52E-07	0.223251317	0.119	0.075	0.003659794	2	Bma-tomm-7	MS
WBGene00227123	4.77E-07	0.037084055	0.172	0.116	0.004952554	2	Bma-zipt-15	MS
WBGene00268573	5.07E-07	0.121304024	0.548	0.445	0.005263378	2	Bm17430	MS
WBGene00229332	5.61E-07	0.148240017	0.2	0.139	0.005827018	2	Bm9071	MS
WBGene00225169	5.98E-07	0.073533647	0.303	0.226	0.00620938	2	Bma-gut-2	MS
WBGene00228412	7.01E-07	0.104993607	0.377	0.286	0.007277131	2	Bm8151	MS
WBGene00223294	7.63E-07	0.145267714	0.139	0.092	0.007926742	2	Bma-eif-3.F	MS
WBGene00223135	7.77E-07	0.195746848	0.159	0.11	0.008072904	2	Bm2874	MS
WBGene00223628	1.08E-06	0.152825363	0.22	0.159	0.011215888	2	Bm3367	MS
WBGene00224811	1.11E-06	0.082847845	0.223	0.16	0.011491206	2	Bma-hrpr-1	MS
WBGene00223165	1.17E-06	0.115748056	0.295	0.22	0.012117746	2	Bma-ril-1	MS
WBGene00229365	1.20E-06	0.170804985	0.155	0.107	0.012422376	2	Bm9104	MS
WBGene00226400	1.36E-06	0.106808194	0.206	0.147	0.014075418	2	Bm6139	MS
WBGene00223805	1.51E-06	0.142984538	0.163	0.112	0.015636172	2	Bma-rpt-4	MS
WBGene00235052	1.59E-06	0.169284009	0.106	0.067	0.016548926	2	Bm14717	MS
WBGene00224142	1.60E-06	0.127560502	0.195	0.138	0.016606784	2	Bm3881	MS
WBGene00255590	1.60E-06	0.094917044	0.225	0.162	0.016623953	2	Bma-dss-1	MS
WBGene00226162	1.71E-06	0.161747875	0.146	0.1	0.017805237	2	Bma-cmd-1	MS
WBGene00226691	1.75E-06	0.112690144	0.114	0.073	0.018179758	2	Bma-oig-2	MS
WBGene00234316	1.93E-06	0.111888545	0.382	0.29	0.020059479	2	Bm14055	MS
WBGene00224520	2.09E-06	0.114319621	0.284	0.213	0.021664531	2	Bma-ftt-2.2	MS
WBGene00220503	2.19E-06	0.105144418	0.186	0.13	0.022710241	2	Bm242	MS
WBGene00226655	2.29E-06	0.267363529	0.106	0.068	0.02376629	2	Bma-rpb-10	MS
WBGene00224191	2.57E-06	0.155495888	0.339	0.267	0.026708448	2	Bma-rps-26	MS
WBGene00228445	2.65E-06	0.074466745	0.353	0.273	0.027501796	2	Bma-frm-1	MS
WBGene00223445	2.87E-06	0.184903384	0.111	0.072	0.029821856	2	Bma-gpc-2	MS
WBGene00222800	3.07E-06	0.093508524	0.225	0.163	0.031898984	2	Bma-dyc-1	MS
WBGene00225894	3.09E-06	0.051056288	0.19	0.135	0.032057387	2	Bma-nog-1.2	MS
WBGene00223138	3.19E-06	0.202004014	0.125	0.084	0.033098046	2	Bm2877	MS
WBGene00230129	3.46E-06	0.11864103	0.218	0.159	0.035914067	2	Bma-timm-23.4	MS
WBGene00234001	3.48E-06	0.158496067	0.102	0.065	0.036137169	2	Bma-fkb-2	MS
WBGene00233964	3.55E-06	0.137049605	0.181	0.129	0.036829202	2	Bma-cct-5	MS
WBGene00234286	3.78E-06	0.210412332	0.128	0.086	0.039260106	2	Bma-eif-6	MS
WBGene00227460	3.80E-06	0.103441264	0.211	0.151	0.039434869	2	Bm7199	MS
WBGene00234320	4.05E-06	0.071631577	0.815	0.741	0.04205076	2	Bma-rps-12	MS
WBGene00222153	4.15E-06	0.132032121	0.314	0.239	0.043094336	2	Bma-ahsa-1	MS
WBGene00222020	4.16E-06	0.134940247	0.162	0.114	0.043240484	2	Bma-rbm-26	MS
WBGene00235079	4.18E-06	0.106112785	0.113	0.074	0.043419126	2	Bma-timm-23.5	MS
WBGene00233911	4.19E-06	0.170640745	0.107	0.069	0.043530148	2	Bma-rpl-39	MS
WBGene00222225	4.51E-06	0.210020892	0.115	0.077	0.046837769	2	Bma-hyls-1	MS
WBGene00227222	4.68E-06	0.115714023	0.169	0.118	0.048589697	2	Bma-dnj-29	MS
WBGene00225141	4.77E-06	0.221735753	0.138	0.095	0.049571695	2	Bm4880	MS
WBGene00233959	5.22E-06	0.031923539	0.348	0.266	0.054183998	2	Bma-hel-1	MS
WBGene00227265	5.50E-06	0.043071296	0.236	0.175	0.057091285	2	Bma-eel-1	MS
WBGene00224377	5.84E-06	-0.188532732	0.946	0.941	0.060631858	2	Bm4116	MS
WBGene00227430	5.93E-06	0.118216098	0.139	0.095	0.061550998	2	Bm7169	MS
WBGene00226511	6.05E-06	0.038599419	0.241	0.177	0.062869697	2	Bma-rpl-31	MS
WBGene00234268	6.25E-06	0.074522671	0.695	0.585	0.06488766	2	Bm14007	MS
WBGene00231107	6.41E-06	0.103659849	0.122	0.081	0.06658726	2	Bm10846	MS
WBGene00220685	6.49E-06	0.130658144	0.122	0.082	0.067443444	2	Bm424	MS
WBGene00223433	6.71E-06	0.144523099	0.199	0.146	0.06970254	2	Bm3172	MS
WBGene00227700	7.36E-06	0.064389449	0.379	0.29	0.076465723	2	Bma-nol-16	MS
WBGene00222311	7.72E-06	0.098178203	0.141	0.098	0.080170759	2	Bma-pct-1	MS
WBGene00224338	7.75E-06	-0.009926088	0.209	0.153	0.080519839	2	Bma-nucb-1	MS
WBGene00226725	8.31E-06	0.150990129	0.17	0.122	0.086284173	2	Bma-pro-3	MS
WBGene00228826	8.59E-06	0.109934998	0.113	0.075	0.089169204	2	Bm8565	MS
WBGene00234173	8.61E-06	0.094556331	0.176	0.127	0.089383111	2	Bma-snr-7	MS
WBGene00223584	8.87E-06	0.21372761	0.13	0.09	0.092130565	2	Bma-srgp-1	MS
WBGene00225570	9.52E-06	0.046937251	0.213	0.157	0.09884998	2	Bma-ivns-1	MS
WBGene00226496	1.00E-05	0.055555256	0.276	0.207	0.103853775	2	Bma-snr-2	MS
WBGene00223543	1.04E-05	0.104547268	0.103	0.067	0.108401714	2	Bma-tsn-1	MS
WBGene00234140	1.11E-05	0.084345038	0.205	0.15	0.115792633	2	Bm13879	MS
WBGene00233940	1.15E-05	0.030321147	0.221	0.163	0.119826292	2	Bma-pdi-2	MS
WBGene00234192	1.22E-05	0.089019681	0.107	0.071	0.126244938	2	Bma-moc-3	MS
WBGene00228757	1.36E-05	0.04173122	0.245	0.184	0.14144722	2	Bm8496	MS
WBGene00226027	1.51E-05	0.234796481	0.12	0.083	0.156591431	2	Bm5766	MS
WBGene00220929	1.60E-05	0.097194102	0.104	0.068	0.166395372	2	Bm668	MS
WBGene00234936	1.74E-05	0.128282252	0.112	0.076	0.180232704	2	Bma-nrfl-1	MS
WBGene00225610	1.79E-05	0.079349797	0.573	0.482	0.18589352	2	Bma-rpl-28	MS
WBGene00234299	1.79E-05	0.103251856	0.15	0.106	0.186042868	2	Bma-hint-1	MS
WBGene00234177	1.81E-05	0.063020156	0.266	0.201	0.188113442	2	Bma-prp-8	MS
WBGene00225573	1.86E-05	0.041742085	0.263	0.196	0.193340147	2	Bma-mag-1	MS
WBGene00222031	1.99E-05	0.000860506	0.206	0.15	0.206743955	2	Bma-unc-44	MS
WBGene00225126	2.07E-05	-0.019153706	0.431	0.339	0.215318292	2	Bma-tos-1	MS
WBGene00223009	2.21E-05	0.074524331	0.37	0.29	0.229835638	2	Bm2748	MS
WBGene00228581	2.25E-05	0.092567437	0.195	0.145	0.234160482	2	Bm8320	MS
WBGene00225680	2.27E-05	0.031162335	0.183	0.132	0.235776201	2	Bma-pcf-11	MS
WBGene00234324	2.29E-05	0.08916052	0.268	0.204	0.237848637	2	Bma-dlc-1	MS
WBGene00226325	2.32E-05	-0.030146409	0.304	0.232	0.241246261	2	Bm6064	MS
WBGene00224008	2.42E-05	0.169706561	0.128	0.09	0.251383436	2	Bma-metl-17	MS
WBGene00231042	2.47E-05	0.020824782	0.308	0.236	0.256211546	2	Bma-ttr-41	MS
WBGene00225821	2.72E-05	0.184251197	0.114	0.078	0.282921273	2	Bm5560	MS
WBGene00226904	2.75E-05	0.146562853	0.143	0.102	0.285911677	2	Bm6643	MS
WBGene00233154	2.82E-05	0.129617003	0.128	0.089	0.292864986	2	Bm12893	MS
WBGene00224317	2.84E-05	0.156212926	0.116	0.079	0.294724726	2	Bma-urm-1	MS
WBGene00225373	2.88E-05	0.094049084	0.101	0.067	0.299576968	2	Bm5112	MS
WBGene00223735	2.98E-05	0.012852157	0.265	0.202	0.309904235	2	Bma-let-765	MS
WBGene00234162	3.18E-05	0.062701889	0.512	0.422	0.330498355	2	Bma-rps-16	MS
WBGene00229498	4.00E-05	0.058690514	0.33	0.256	0.41509449	2	Bm9237	MS
WBGene00226749	4.01E-05	0.093167418	0.123	0.087	0.416478277	2	Bma-mtk-1	MS
WBGene00223305	4.35E-05	0.031275545	0.208	0.154	0.45204838	2	Bm3044	MS
WBGene00224042	4.55E-05	-0.015061952	0.353	0.279	0.472485068	2	Bma-cey-1	MS
WBGene00221985	4.58E-05	0.073388232	0.172	0.125	0.475422576	2	Bm1724	MS
WBGene00226208	4.60E-05	0.0236577	0.168	0.121	0.477907622	2	Bm5947	MS
WBGene00227105	4.63E-05	0.051747687	0.102	0.069	0.480545378	2	Bm6844	MS
WBGene00222982	4.68E-05	0.08078777	0.341	0.271	0.485921905	2	Bm2721	MS
WBGene00232650	4.95E-05	0.071494239	0.181	0.133	0.514243719	2	Bma-sto-2	MS
WBGene00220954	5.28E-05	0.069439665	0.195	0.145	0.548296716	2	Bm693	MS
WBGene00224216	5.46E-05	0.172773503	0.1	0.068	0.566522329	2	Bm3955	MS
WBGene00225272	5.52E-05	0.068840988	0.173	0.127	0.573096156	2	Bma-mrpl-36	MS
WBGene00224657	5.52E-05	0.099846863	0.144	0.104	0.573488665	2	Bma-egl-4	MS
WBGene00234070	5.56E-05	0.060091668	0.2	0.15	0.577905764	2	Bm13809	MS
WBGene00224735	5.63E-05	0.073211226	0.164	0.12	0.584592314	2	Bma-ucr-1	MS
WBGene00226831	5.66E-05	0.026234353	0.722	0.636	0.587281124	2	Bma-rpl-18	MS
WBGene00226241	5.77E-05	0.053679424	0.164	0.119	0.59931239	2	Bm5980	MS
WBGene00234164	6.11E-05	0.122579273	0.25	0.194	0.634904398	2	Bm13903	MS
WBGene00235066	6.19E-05	0.063718716	0.152	0.108	0.642444778	2	Bm14731	MS
WBGene00231641	6.25E-05	0.166826519	0.128	0.092	0.649013429	2	Bma-pro-2	MS
WBGene00234142	6.33E-05	0.103020354	0.1	0.068	0.657241067	2	Bma-mog-2	MS
WBGene00227313	6.47E-05	0.180291797	0.13	0.095	0.671636465	2	Bma-pghm-1	MS
WBGene00221959	6.55E-05	0.065429587	0.197	0.146	0.679876888	2	Bm1698	MS
WBGene00226602	7.07E-05	0.150526146	0.107	0.074	0.733908011	2	Bma-rpl-7A.1	MS
WBGene00229466	7.54E-05	0.068545471	0.115	0.08	0.783517439	2	Bm9205	MS
WBGene00232900	7.63E-05	0.078666752	0.172	0.127	0.791897887	2	Bma-arid-1	MS
WBGene00220433	8.00E-05	0.089761445	0.13	0.092	0.830787356	2	Bm172	MS
WBGene00234099	8.20E-05	0.030979997	0.12	0.084	0.851291316	2	Bma-adss-1	MS
WBGene00226546	8.67E-05	0.016752767	0.165	0.121	0.900830882	2	Bm6285	MS
WBGene00268538	8.69E-05	-0.020670742	0.177	0.132	0.901951548	2	Bma-rsp-3.2	MS
WBGene00223024	8.85E-05	-0.038999847	0.154	0.112	0.91954057	2	Bma-ubr-4	MS
WBGene00230098	8.86E-05	0.087756543	0.148	0.106	0.920209362	2	Bm9837	MS
WBGene00234280	8.89E-05	0.056310275	0.187	0.138	0.923275682	2	Bm14019	MS
WBGene00222220	8.91E-05	0.040140477	0.13	0.093	0.924975062	2	Bma-mog-4	MS
WBGene00223049	9.11E-05	0.174717873	0.119	0.084	0.946095573	2	Bma-hcf-1	MS
WBGene00222106	9.56E-05	0.008924973	0.167	0.122	0.993092126	2	Bma-prdh-1	MS
WBGene00233160	9.93E-05	0.08183983	0.18	0.134	1	2	Bm12899	MS
WBGene00233913	9.99E-05	0.153225359	0.117	0.083	1	2	Bma-him-1	MS
WBGene00227210	0.000100614	0.043569268	0.268	0.208	1	2	Bm6949	MS
WBGene00227269	0.000104214	0.046893112	0.158	0.114	1	2	Bma-kdp-1	MS
WBGene00227855	0.000106581	0.011195859	0.256	0.197	1	2	Bma-puf-12	MS
WBGene00231055	0.000107114	0.064156438	0.181	0.136	1	2	Bma-iffb-1	MS
WBGene00234314	0.000111043	0.008183229	0.351	0.275	1	2	Bma-iscu-1	MS
WBGene00225910	0.000111672	0.030909629	0.196	0.146	1	2	Bm5649	MS
WBGene00223226	0.00012296	-0.017885098	0.121	0.085	1	2	Bma-frpr-5	MS
WBGene00226463	0.000126633	0.05582984	0.107	0.074	1	2	Bma-ret-1	MS
WBGene00222474	0.000129665	0.091045818	0.195	0.149	1	2	Bma-popl-4	MS
WBGene00234143	0.000130008	0.04965067	0.481	0.394	1	2	Bma-rps-6	MS
WBGene00222141	0.000130732	0.09282157	0.114	0.08	1	2	Bm1880	MS
WBGene00225895	0.000131124	0.035735003	0.509	0.423	1	2	Bma-rps-24	MS
WBGene00227992	0.000133051	0.007110461	0.16	0.118	1	2	Bma-fkb-1	MS
WBGene00234976	0.000137381	0.129047119	0.156	0.116	1	2	Bma-nft-1	MS
WBGene00222099	0.00013836	0.071015024	0.136	0.098	1	2	Bm1838	MS
WBGene00222790	0.000140683	0.102551095	0.134	0.096	1	2	Bm2529	MS
WBGene00224756	0.000148313	0.030940903	0.211	0.161	1	2	Bma-wbp-4	MS
WBGene00222388	0.000148402	0.031159008	0.113	0.08	1	2	Bma-pezo-1	MS
WBGene00222114	0.000153624	0.170141627	0.111	0.079	1	2	Bma-exos-4.1	MS
WBGene00230839	0.000154271	0.056348286	0.147	0.108	1	2	Bm10578	MS
WBGene00221291	0.00015608	0.06422973	0.173	0.129	1	2	Bm1030	MS
WBGene00227549	0.000157519	0.005242582	0.246	0.19	1	2	Bm7288	MS
WBGene00225720	0.000157817	0.005996088	0.3	0.232	1	2	Bm5459	MS
WBGene00225998	0.000159307	0.046578605	0.189	0.142	1	2	Bm5737	MS
WBGene00226434	0.000159631	0.120043868	0.107	0.075	1	2	Bm6173	MS
WBGene00223720	0.000162519	0.044459074	0.115	0.081	1	2	Bm3459	MS
WBGene00224731	0.000162555	0.027454546	0.186	0.138	1	2	Bma-mrps-16	MS
WBGene00225468	0.00016661	0.034260728	0.101	0.07	1	2	Bm5207	MS
WBGene00225855	0.000172138	0.05954468	0.123	0.088	1	2	Bma-vps-53	MS
WBGene00227059	0.000172736	0.014046232	0.205	0.155	1	2	Bma-nduf-5	MS
WBGene00225341	0.000178212	0.123367777	0.125	0.09	1	2	Bma-hat-1	MS
WBGene00226014	0.000179132	0.07741405	0.153	0.114	1	2	Bma-lin-59	MS
WBGene00225969	0.000185341	0.118786162	0.104	0.073	1	2	Bma-ztf-4	MS
WBGene00234258	0.000186975	0.154628796	0.118	0.085	1	2	Bma-rpn-9	MS
WBGene00226911	0.000188151	0.02559508	0.114	0.08	1	2	Bma-pinn-4	MS
WBGene00225386	0.000191902	0.113084567	0.132	0.097	1	2	Bm5125	MS
WBGene00222232	0.000198358	0.038622788	0.189	0.141	1	2	Bma-snx-1	MS
WBGene00224581	0.000201799	0.039274455	0.101	0.069	1	2	Bma-mnat-1	MS
WBGene00234211	0.000209277	-0.002939372	0.161	0.118	1	2	Bma-sars-2	MS
WBGene00224269	0.000209562	0.144237817	0.127	0.095	1	2	Bma-elo-5	MS
WBGene00227237	0.000211006	0.037014827	0.208	0.159	1	2	Bma-icd-2	MS
WBGene00235022	0.000224068	0.100542731	0.129	0.094	1	2	Bm14687	MS
WBGene00224995	0.000225114	0.117884922	0.139	0.103	1	2	Bm4734	MS
WBGene00229889	0.000226645	0.077111566	0.234	0.182	1	2	Bm9628	MS
WBGene00230220	0.000230361	0.041439655	0.73	0.641	1	2	Bma-rps-23.1	MS
WBGene00234156	0.000231226	-0.110290841	0.95	0.931	1	2	Bma-tct-1	MS
WBGene00226214	0.000233129	0.029735363	0.102	0.071	1	2	Bm5953	MS
WBGene00224272	0.000237887	0.083214464	0.117	0.084	1	2	Bm4011	MS
WBGene00234210	0.000251357	0.042618037	0.211	0.162	1	2	Bma-lpd-7	MS
WBGene00224012	0.000253211	0.058310817	0.172	0.131	1	2	Bm3751	MS
WBGene00223999	0.000263014	-0.003763775	0.45	0.362	1	2	Bm3738	MS
WBGene00226239	0.000263105	-0.016379715	0.208	0.159	1	2	Bm5978	MS
WBGene00224998	0.0002689	0.074613195	0.417	0.348	1	2	Bma-dph-3	MS
WBGene00230230	0.000271706	-0.002097444	0.134	0.097	1	2	Bm9969	MS
WBGene00220882	0.000283958	0.106123131	0.101	0.071	1	2	Bm621	MS
WBGene00229924	0.000286633	-0.030945624	0.165	0.123	1	2	Bma-apc-11.1	MS
WBGene00225692	0.000296096	0.053934217	0.161	0.12	1	2	Bm5431	MS
WBGene00233216	0.000306391	0.019437917	0.11	0.079	1	2	Bma-mdf-1	MS
WBGene00223086	0.000324234	-0.012970762	0.248	0.193	1	2	Bma-egl-19	MS
WBGene00234236	0.00032534	0.210653292	0.112	0.081	1	2	Bma-map-1	MS
WBGene00223339	0.000347685	0.026786749	0.139	0.102	1	2	Bm3078	MS
WBGene00234131	0.000349788	0.072376891	0.134	0.099	1	2	Bma-rpn-8	MS
WBGene00223556	0.000355527	0.085402557	0.212	0.166	1	2	Bma-repo-1	MS
WBGene00234176	0.000369086	0.040619014	0.178	0.136	1	2	Bma-lsm-8	MS
WBGene00229872	0.000375724	0.101801431	0.129	0.095	1	2	Bm9611	MS
WBGene00222582	0.000375761	0.044476613	0.183	0.141	1	2	Bma-rpn-2	MS
WBGene00222945	0.000380211	-0.004376343	0.225	0.172	1	2	Bm2684	MS
WBGene00226199	0.000391224	0.055997259	0.108	0.077	1	2	Bma-ckr-1	MS
WBGene00223071	0.000395695	-0.049217555	0.139	0.103	1	2	Bma-trr-1	MS
WBGene00223937	0.000396166	0.117607061	0.121	0.089	1	2	Bma-rsr-1	MS
WBGene00220527	0.000404862	0.047260917	0.237	0.185	1	2	Bm266	MS
WBGene00230688	0.000419625	0.097187042	0.127	0.094	1	2	Bma-stip-1	MS
WBGene00225493	0.000425318	0.012234303	0.17	0.129	1	2	Bma-vdac-1	MS
WBGene00234276	0.000427558	0.095018785	0.139	0.104	1	2	Bma-phb-2	MS
WBGene00225052	0.000428568	-0.015653703	0.183	0.139	1	2	Bma-mog-1	MS
WBGene00222599	0.000443855	0.098849024	0.117	0.085	1	2	Bm2338	MS
WBGene00226114	0.000447883	0.030129539	0.119	0.086	1	2	Bm5853	MS
WBGene00231406	0.000450013	-0.00160257	0.206	0.159	1	2	Bma-ttx-7	MS
WBGene00269265	0.000468243	0.034188569	0.105	0.075	1	2	Bma-nst-1	MS
WBGene00226560	0.000475101	0.074340248	0.131	0.097	1	2	Bm6299	MS
WBGene00226026	0.000479024	-0.014586191	0.129	0.094	1	2	Bm5765	MS
WBGene00223968	0.000485922	0.059997026	0.221	0.175	1	2	Bm3707	MS
WBGene00227072	0.000486987	0.035543879	0.266	0.21	1	2	Bm6811	MS
WBGene00229308	0.000511264	-0.014731775	0.183	0.139	1	2	Bm9047	MS
WBGene00227396	0.000516713	0.052516021	0.154	0.117	1	2	Bm7135	MS
WBGene00220836	0.000525307	0.049783131	0.1	0.071	1	2	Bma-mrpl-17	MS
WBGene00234163	0.000527981	0.034675169	0.462	0.381	1	2	Bma-rps-22	MS
WBGene00228657	0.000529356	0.1294523	0.114	0.084	1	2	Bm8396	MS
WBGene00234118	0.000530691	0.068633434	0.171	0.132	1	2	Bm13857	MS
WBGene00223374	0.000533285	0.040470968	0.112	0.081	1	2	Bma-mog-5	MS
WBGene00233989	0.000533541	0.016874431	0.136	0.101	1	2	Bma-ogdh-1	MS
WBGene00225896	0.000534244	0.076269936	0.184	0.143	1	2	Bm5635	MS
WBGene00227095	0.00056163	0.123553098	0.114	0.083	1	2	Bm6834	MS
WBGene00223592	0.000563841	0.020655757	0.579	0.496	1	2	Bma-rpl-3	MS
WBGene00225675	0.00056471	0.076948205	0.201	0.158	1	2	Bma-gst-1	MS
WBGene00225593	0.000579887	0.11726846	0.122	0.091	1	2	Bma-vha-1	MS
WBGene00233852	0.000582207	0.053843193	0.107	0.077	1	2	Bm13591	MS
WBGene00227760	0.000587835	0.057612966	0.105	0.075	1	2	Bma-dnc-1.2	MS
WBGene00233923	0.000595309	0.007639417	0.345	0.279	1	2	Bma-hsp-6	MS
WBGene00231693	0.000595698	0.066868541	0.104	0.075	1	2	Bm11432	MS
WBGene00222321	0.000596381	0.00436377	0.153	0.115	1	2	Bma-cux-7	MS
WBGene00223342	0.00061175	0.002309931	0.228	0.181	1	2	Bm3081	MS
WBGene00234319	0.000616932	0.028183546	0.342	0.272	1	2	Bma-rpb-6	MS
WBGene00225501	0.000624098	0.038935684	0.113	0.082	1	2	Bma-mes-2	MS
WBGene00227084	0.000627209	0.111650619	0.103	0.074	1	2	Bma-manf-1	MS
WBGene00229899	0.000634565	0.134599101	0.112	0.082	1	2	Bm9638	MS
WBGene00223692	0.000640771	0.075324135	0.124	0.093	1	2	Bma-utp-20	MS
WBGene00223206	0.000641044	0.029380213	0.123	0.09	1	2	Bma-pmp-3	MS
WBGene00225580	0.000641264	0.041374762	0.151	0.114	1	2	Bma-nhr-1	MS
WBGene00228622	0.000641346	-0.029714277	0.131	0.097	1	2	Bma-cfim-2	MS
WBGene00227403	0.00064973	0.119145784	0.139	0.105	1	2	Bm7142	MS
WBGene00226459	0.000678582	-0.030341651	0.209	0.161	1	2	Bma-pck-1	MS
WBGene00224124	0.00068351	0.000533295	0.134	0.1	1	2	Bma-ubr-5	MS
WBGene00234119	0.000719192	0.064688491	0.106	0.077	1	2	Bma-arx-3	MS
WBGene00234338	0.000723371	0.014527112	0.246	0.194	1	2	Bma-snr-5	MS
WBGene00224503	0.000759562	0.058149121	0.11	0.08	1	2	Bma-abts-1	MS
WBGene00226616	0.000762975	0.090094927	0.105	0.076	1	2	Bma-szy-2	MS
WBGene00225206	0.000794838	-0.000530552	0.103	0.074	1	2	Bma-pik-1	MS
WBGene00230696	0.000812542	0.078419638	0.109	0.08	1	2	Bm10435	MS
WBGene00234956	0.000820197	-0.016514364	0.152	0.114	1	2	Bm14771	MS
WBGene00222961	0.000840963	0.083821486	0.119	0.088	1	2	Bm2700	MS
WBGene00223658	0.000856549	-0.045305545	0.258	0.206	1	2	Bm3397	MS
WBGene00226544	0.000874628	0.020140738	0.178	0.136	1	2	Bma-ttr-37	MS
WBGene00229391	0.000921018	0.068444696	0.142	0.109	1	2	Bma-ccch-1	MS
WBGene00234307	0.000932301	0.015026308	0.576	0.488	1	2	Bma-rps-18	MS
WBGene00223474	0.000934368	0.061178009	0.104	0.075	1	2	Bma-unc-115	MS
WBGene00224573	0.000938495	0.010936282	0.124	0.092	1	2	Bma-sde-2	MS
WBGene00234332	0.000948473	0.034784337	0.281	0.225	1	2	Bma-snr-4	MS
WBGene00225258	0.000950005	-0.009897147	0.226	0.179	1	2	Bma-unc-70	MS
WBGene00233578	0.000962943	-0.009671797	0.218	0.17	1	2	Bma-ipgm-1	MS
WBGene00234044	0.000972072	0.02204246	0.514	0.435	1	2	Bma-rps-15	MS
WBGene00229794	0.000981245	0.064048241	0.103	0.075	1	2	Bma-smg-4	MS
WBGene00226872	0.001001324	-0.023745922	0.262	0.205	1	2	Bm6611	MS
WBGene00226727	0.001021833	0.089554561	0.103	0.075	1	2	Bm6466	MS
WBGene00224891	0.001031554	0.053632848	0.101	0.074	1	2	Bma-pdi-3	MS
WBGene00230785	0.001063411	0.005051095	0.105	0.076	1	2	Bm10524	MS
WBGene00234227	0.001063985	-0.011999472	0.152	0.115	1	2	Bma-ruvb-2	MS
WBGene00222974	0.001069981	-0.043391586	0.329	0.261	1	2	Bma-apl-1	MS
WBGene00234100	0.00107368	-0.062138181	0.179	0.137	1	2	Bma-pgk-1	MS
WBGene00222649	0.001093191	-0.006622794	0.2	0.156	1	2	Bma-dnc-4	MS
WBGene00227441	0.001100008	0.064450554	0.107	0.079	1	2	Bma-uaf-1	MS
WBGene00231234	0.001144539	0.069239076	0.1	0.073	1	2	Bm10973	MS
WBGene00221994	0.001169249	0.019561071	0.141	0.107	1	2	Bm1733	MS
WBGene00234322	0.001177347	0.04726742	0.21	0.168	1	2	Bma-rpl-27	MS
WBGene00229162	0.001194732	0.070356014	0.114	0.085	1	2	Bma-pnn-1	MS
WBGene00234042	0.001213565	0.01049948	0.326	0.264	1	2	Bma-ndk-1	MS
WBGene00233946	0.001265438	0.078407126	0.145	0.112	1	2	Bma-lin-53	MS
WBGene00227633	0.001306971	0.011598879	0.337	0.274	1	2	Bma-mlck-1	MS
WBGene00225120	0.001363206	-0.005913545	0.324	0.259	1	2	Bm4859	MS
WBGene00223456	0.001392188	0.009127291	0.178	0.137	1	2	Bma-unc-98	MS
WBGene00225932	0.001434001	0.068395612	0.108	0.081	1	2	Bma-sftb-1	MS
WBGene00234240	0.001466772	0.022413988	0.154	0.118	1	2	Bm13979	MS
WBGene00227455	0.00147477	-0.033565963	0.119	0.088	1	2	Bma-mrpl-15	MS
WBGene00225936	0.00148011	-0.009496901	0.621	0.521	1	2	Bma-rps-17	MS
WBGene00229509	0.001516159	0.081947355	0.111	0.083	1	2	Bm9248	MS
WBGene00226204	0.001531012	0.084909835	0.196	0.155	1	2	Bm5943	MS
WBGene00220498	0.001537976	-0.00448017	0.1	0.073	1	2	Bm237	MS
WBGene00224800	0.001548151	0.096522644	0.114	0.086	1	2	Bma-rpac-19	MS
WBGene00230226	0.001555389	0.080617611	0.114	0.085	1	2	Bm9965	MS
WBGene00229306	0.00157575	0.072133539	0.103	0.076	1	2	Bm9045	MS
WBGene00225064	0.001575773	0.118869834	0.113	0.084	1	2	Bm4803	MS
WBGene00227861	0.001587074	-0.052507567	0.216	0.17	1	2	Bm7600	MS
WBGene00226391	0.001591531	0.047204425	0.101	0.073	1	2	Bma-cisd-1	MS
WBGene00223779	0.001621242	0.05839819	0.114	0.086	1	2	Bma-nduf-6	MS
WBGene00226090	0.001647834	0.09844273	0.12	0.092	1	2	Bma-ngp-1	MS
WBGene00230417	0.001668832	0.058493565	0.115	0.086	1	2	Bm10156	MS
WBGene00225691	0.001698065	0.000115607	0.598	0.513	1	2	Bma-rpl-6	MS
WBGene00231173	0.001756174	-0.043085723	0.191	0.15	1	2	Bm10912	MS
WBGene00225168	0.001798553	0.037158888	0.178	0.141	1	2	Bm4907	MS
WBGene00224604	0.001884554	-0.121532189	0.866	0.838	1	2	Bma-pat-10	MS
WBGene00223797	0.001887437	0.022157748	0.157	0.122	1	2	Bma-dlat-1	MS
WBGene00223319	0.001982841	0.022017324	0.168	0.131	1	2	Bma-rsp-7	MS
WBGene00222285	0.002004561	-0.03161598	0.491	0.402	1	2	Bm2024	MS
WBGene00231111	0.002020967	-0.019160944	0.418	0.335	1	2	Bm10850	MS
WBGene00234011	0.002027083	-0.06831391	0.221	0.176	1	2	Bma-cnx-1	MS
WBGene00232772	0.002047351	-0.048649922	0.456	0.38	1	2	Bm12511	MS
WBGene00223868	0.002056636	0.076478422	0.112	0.084	1	2	Bma-hrpk-1.2	MS
WBGene00233994	0.002061446	-0.062380358	0.213	0.168	1	2	Bma-eef-2	MS
WBGene00227131	0.002064089	0.0329428	0.581	0.498	1	2	Bma-mif-1	MS
WBGene00268542	0.002075588	0.081767395	0.106	0.079	1	2	Bm17399	MS
WBGene00233934	0.002078083	0.083067967	0.107	0.08	1	2	Bma-pas-2	MS
WBGene00269277	0.002093424	-0.000897573	0.159	0.124	1	2	Bm18137	MS
WBGene00227591	0.002094939	-0.011834806	0.135	0.103	1	2	Bma-mrpl-45	MS
WBGene00223440	0.002144893	0.029929629	0.106	0.08	1	2	Bma-ints-6.1	MS
WBGene00220669	0.002212579	0.032890865	0.866	0.799	1	2	Bma-rpl-33.2	MS
WBGene00222214	0.002228511	0.039646729	0.584	0.501	1	2	Bma-rpl-14	MS
WBGene00229795	0.002238971	0.057733771	0.1	0.074	1	2	Bma-rho-1.2	MS
WBGene00229810	0.002242924	0.100122997	0.11	0.083	1	2	Bm9549	MS
WBGene00227558	0.002254329	-0.024854914	0.119	0.089	1	2	Bma-lgc-55	MS
WBGene00232565	0.002327798	-0.016172274	0.178	0.14	1	2	Bm12304	MS
WBGene00233922	0.002360505	-0.064991816	0.123	0.093	1	2	Bm13661	MS
WBGene00223423	0.002449252	-0.177486735	0.726	0.685	1	2	Bma-unc-15	MS
WBGene00223768	0.002461427	0.028994758	0.193	0.154	1	2	Bma-dnj-10	MS
WBGene00226457	0.002478209	0.029707402	0.112	0.085	1	2	Bm6196	MS
WBGene00222255	0.002506425	-0.029058037	0.194	0.153	1	2	Bm1994	MS
WBGene00223269	0.002527707	-0.047967326	0.166	0.129	1	2	Bm3008	MS
WBGene00231095	0.002541691	0.016594034	0.102	0.076	1	2	Bm10834	MS
WBGene00225817	0.002626846	-0.080318025	0.128	0.098	1	2	Bm5556	MS
WBGene00229489	0.002646358	0.013668986	0.178	0.142	1	2	Bma-mec-12	MS
WBGene00231471	0.002726009	-0.035818136	0.117	0.089	1	2	Bma-lin-13	MS
WBGene00269128	0.002756949	-0.024399991	0.137	0.105	1	2	Bma-cas-1	MS
WBGene00226436	0.002826052	-0.024684733	0.107	0.08	1	2	Bma-ints-4	MS
WBGene00227883	0.002878432	0.05589323	0.152	0.119	1	2	Bma-mrps-23	MS
WBGene00227738	0.002887058	-0.006169808	0.638	0.535	1	2	Bm7477	MS
WBGene00227000	0.002987105	-0.005117908	0.167	0.131	1	2	Bma-dxbp-1	MS
WBGene00223248	0.003002254	-0.069470409	0.198	0.155	1	2	Bma-mlc-4	MS
WBGene00224229	0.003105246	-0.041008824	0.143	0.111	1	2	Bm3968	MS
WBGene00223600	0.00317204	0.022137338	0.163	0.129	1	2	Bma-ldh-1	MS
WBGene00227957	0.00324401	-0.059362153	0.126	0.097	1	2	Bma-let-711	MS
WBGene00225078	0.003299454	0.021905151	0.122	0.094	1	2	Bma-rnp-7	MS
WBGene00225546	0.003341674	-0.016206317	0.153	0.119	1	2	Bma-rnp-4	MS
WBGene00224743	0.003381716	-0.017921768	0.253	0.206	1	2	Bma-vig-1	MS
WBGene00222697	0.003394928	0.069937041	0.139	0.11	1	2	Bma-tmem-131	MS
WBGene00227301	0.003399361	0.055452696	0.161	0.127	1	2	Bma-trap-1	MS
WBGene00225565	0.003409258	0.110438562	0.102	0.077	1	2	Bm5304	MS
WBGene00228006	0.00341066	0.027702118	0.109	0.083	1	2	Bm7745	MS
WBGene00224647	0.003495871	-0.026006861	0.203	0.162	1	2	Bma-nhl-1	MS
WBGene00234089	0.003523863	0.020643611	0.11	0.084	1	2	Bma-vps-45	MS
WBGene00226980	0.003564385	-0.033515793	0.125	0.096	1	2	Bma-slo-1	MS
WBGene00234321	0.003573932	0.040992461	0.185	0.149	1	2	Bma-rps-19.2	MS
WBGene00223293	0.003577378	-0.022350014	0.229	0.183	1	2	Bma-eat-3	MS
WBGene00225226	0.003592541	0.013099767	0.125	0.097	1	2	Bma-lpd-6	MS
WBGene00233217	0.003600978	0.073707145	0.126	0.098	1	2	Bm12956	MS
WBGene00231275	0.003627054	0.025288646	0.125	0.097	1	2	Bm11014	MS
WBGene00224633	0.003660652	-0.005531769	0.13	0.101	1	2	Bma-rbc-1	MS
WBGene00222753	0.003672251	0.035456954	0.108	0.082	1	2	Bm2492	MS
WBGene00224002	0.003679516	0.076062668	0.13	0.101	1	2	Bma-lsm-4	MS
WBGene00222066	0.003731847	-0.032310546	0.23	0.185	1	2	Bma-mrpl-41	MS
WBGene00227300	0.003808622	0.014643299	0.168	0.133	1	2	Bma-nxt-1	MS
WBGene00233119	0.003811684	0.087688557	0.106	0.081	1	2	Bma-hrpf-1	MS
WBGene00226678	0.003848838	-0.014348416	0.223	0.179	1	2	Bma-prdx-6	MS
WBGene00226887	0.00393407	0.019406422	0.121	0.093	1	2	Bma-lpd-3	MS
WBGene00234339	0.00394542	0.025360521	0.12	0.092	1	2	Bma-ddp-1	MS
WBGene00226899	0.003955756	0.050064907	0.106	0.08	1	2	Bma-efhd-1	MS
WBGene00229913	0.003976412	0.002334975	0.106	0.08	1	2	Bm9652	MS
WBGene00223350	0.004014006	0.045461399	0.102	0.077	1	2	Bma-mrps-5	MS
WBGene00224081	0.004191171	-0.054444824	0.142	0.111	1	2	Bm3820	MS
WBGene00222546	0.004324169	0.009454766	0.113	0.086	1	2	Bm2285	MS
WBGene00222837	0.004341209	-0.107216021	0.125	0.096	1	2	Bma-unk-1	MS
WBGene00224273	0.004370402	0.074321671	0.18	0.145	1	2	Bma-hrpa-1.2	MS
WBGene00227638	0.004376033	0.025987769	0.122	0.095	1	2	Bma-daf-41	MS
WBGene00234971	0.004435397	-0.057415803	0.249	0.2	1	2	Bma-atp-4	MS
WBGene00234216	0.004473054	-0.042204508	0.148	0.116	1	2	Bma-nol-58	MS
WBGene00224961	0.004569784	0.02364087	0.102	0.078	1	2	Bm4700	MS
WBGene00223906	0.004604288	-0.017258107	0.105	0.079	1	2	Bm3645	MS
WBGene00233091	0.004606602	-0.00249026	0.122	0.095	1	2	Bm12830	MS
WBGene00223447	0.004623154	-0.034116518	0.146	0.113	1	2	Bma-unc-87	MS
WBGene00234141	0.004654194	-0.046705593	0.189	0.15	1	2	Bma-tpi-1	MS
WBGene00230167	0.004894858	0.056495958	0.117	0.091	1	2	Bm9906	MS
WBGene00227554	0.004902472	-0.016888239	0.126	0.098	1	2	Bma-rsp-3.1	MS
WBGene00224340	0.004950027	0.027791034	0.114	0.088	1	2	Bma-cit-1.1	MS
WBGene00233988	0.005019602	0.007586165	0.126	0.098	1	2	Bm13727	MS
WBGene00225849	0.005225554	-0.073873682	0.102	0.077	1	2	Bma-hsr-9	MS
WBGene00223479	0.005253613	-0.011065338	0.191	0.154	1	2	Bm3218	MS
WBGene00234943	0.005301002	-0.047843465	0.221	0.177	1	2	Bm14758	MS
WBGene00220753	0.00531897	-0.088717265	0.139	0.108	1	2	Bm492	MS
WBGene00224920	0.005366111	-0.008545335	0.19	0.153	1	2	Bm4659	MS
WBGene00223828	0.005370047	0.052811709	0.106	0.082	1	2	Bma-nono-1	MS
WBGene00229478	0.005436834	-0.03667982	0.254	0.206	1	2	Bm9217	MS
WBGene00232497	0.005473827	-0.104029539	0.122	0.093	1	2	Bma-rfc-1	MS
WBGene00228106	0.005481686	0.005323431	0.105	0.081	1	2	Bm7845	MS
WBGene00223851	0.005551272	-0.054829349	0.113	0.087	1	2	Bm3590	MS
WBGene00228154	0.005582006	-0.024064588	0.136	0.106	1	2	Bm7893	MS
WBGene00233969	0.005594002	-0.036001485	0.163	0.13	1	2	Bma-cct-2	MS
WBGene00233958	0.005620296	0.000961624	0.163	0.131	1	2	Bm13697	MS
WBGene00228818	0.005655541	-0.038738996	0.236	0.189	1	2	Bm8557	MS
WBGene00229718	0.005678479	0.023530513	0.156	0.124	1	2	Bma-oaz-1	MS
WBGene00233942	0.005731924	0.001966967	0.121	0.094	1	2	Bma-paa-1	MS
WBGene00224584	0.005756742	0.024120492	0.523	0.449	1	2	Bma-rpl-7	MS
WBGene00231627	0.005758203	0.018493006	0.556	0.474	1	2	Bm11366	MS
WBGene00225274	0.005780499	-0.019501791	0.103	0.079	1	2	Bm5013	MS
WBGene00225839	0.005797598	-0.036626121	0.337	0.277	1	2	Bma-cct-1	MS
WBGene00222027	0.005808418	-0.011251325	0.12	0.092	1	2	Bma-hpo-28	MS
WBGene00234281	0.00590311	0.06482817	0.115	0.09	1	2	Bm14020	MS
WBGene00222121	0.005926601	-0.048109443	0.335	0.275	1	2	Bma-tads-1	MS
WBGene00234297	0.005931235	-0.011880716	0.305	0.254	1	2	Bm14036	MS
WBGene00234166	0.005980835	0.038523537	0.771	0.716	1	2	Bma-rla-1	MS
WBGene00224831	0.006003136	-0.05440415	0.185	0.148	1	2	Bm4570	MS
WBGene00222197	0.006028713	0.045345748	0.134	0.105	1	2	Bm1936	MS
WBGene00230956	0.006060019	0.025306995	0.144	0.115	1	2	Bma-akap-1	MS
WBGene00226728	0.006176675	-0.018888717	0.111	0.086	1	2	Bm6467	MS
WBGene00226941	0.006235471	-0.0115259	0.101	0.077	1	2	Bma-gcn-1	MS
WBGene00224545	0.006338876	-0.066702461	0.453	0.376	1	2	Bm4284	MS
WBGene00224883	0.006438458	-0.020326874	0.125	0.098	1	2	Bma-frm-3	MS
WBGene00225801	0.006454151	-0.007704662	0.123	0.096	1	2	Bma-mlp-1	MS
WBGene00234231	0.006465877	-0.006576481	0.165	0.131	1	2	Bm13970	MS
WBGene00226195	0.006599816	-0.081979859	0.101	0.077	1	2	Bma-gei-3	MS
WBGene00226778	0.006609115	-0.018542172	0.177	0.141	1	2	Bma-ced-2	MS
WBGene00224931	0.006626667	0.033360268	0.125	0.098	1	2	Bma-sgca-1	MS
WBGene00223079	0.006677021	-0.053914248	0.155	0.122	1	2	Bma-uba-1	MS
WBGene00226513	0.00670067	-0.085447687	0.225	0.181	1	2	Bma-cox-4	MS
WBGene00230620	0.006773566	-0.116740047	0.898	0.869	1	2	Bma-rsp-5	MS
WBGene00227065	0.006783593	0.002670777	0.16	0.128	1	2	Bma-sec-11	MS
WBGene00227900	0.006795666	-0.14992807	0.198	0.159	1	2	Bma-vab-10	MS
WBGene00234096	0.006809261	-0.056580689	0.199	0.16	1	2	Bma-atp-2	MS
WBGene00227803	0.006824694	0.028851823	0.181	0.148	1	2	Bma-xpo-1	MS
WBGene00233937	0.006876923	0.039559461	0.167	0.134	1	2	Bma-pas-7	MS
WBGene00229313	0.006904613	-0.032427145	0.363	0.3	1	2	Bm9052	MS
WBGene00222415	0.006983536	0.026125352	0.202	0.164	1	2	Bma-taf-3	MS
WBGene00226707	0.007047147	0.066221223	0.101	0.079	1	2	Bma-swt-4	MS
WBGene00222717	0.007062891	0.006977593	0.126	0.099	1	2	Bma-pxl-1	MS
WBGene00230317	0.007072423	0.015265185	0.138	0.11	1	2	Bm10056	MS
WBGene00225382	0.007090914	-0.049427076	0.112	0.088	1	2	Bm5121	MS
WBGene00229607	0.007131328	-0.014594241	0.153	0.121	1	2	Bm9346	MS
WBGene00223948	0.007190206	-0.002220026	0.152	0.122	1	2	Bma-mrps-21	MS
WBGene00234271	0.007228211	0.007145407	0.105	0.081	1	2	Bma-pfd-5	MS
WBGene00231047	0.007324298	0.028332354	0.113	0.088	1	2	Bma-spop-1	MS
WBGene00225611	0.007394476	0.082117114	0.125	0.099	1	2	Bma-mrpl-49	MS
WBGene00227137	0.007430527	0.050889533	0.111	0.087	1	2	Bma-npp-16	MS
WBGene00223121	0.007652898	-0.036090711	0.104	0.08	1	2	Bma-bath-42	MS
WBGene00226372	0.007690729	0.001428826	0.416	0.345	1	2	Bm6111	MS
WBGene00223112	0.007794955	-0.034381695	0.175	0.141	1	2	Bm2851	MS
WBGene00223494	0.007875753	-0.008438635	0.126	0.099	1	2	Bm3233	MS
WBGene00229733	0.007980043	0.056031921	0.131	0.104	1	2	Bm9472	MS
WBGene00224246	0.008006585	-0.021733417	0.309	0.253	1	2	Bma-ctsa-1.1	MS
WBGene00234121	0.00800763	-0.084598019	0.174	0.139	1	2	Bm13860	MS
WBGene00228283	0.008013368	-0.057034377	0.296	0.241	1	2	Bm8022	MS
WBGene00233106	0.008025498	0.073296808	0.123	0.098	1	2	Bm12845	MS
WBGene00227847	0.008051763	-0.102630565	0.155	0.121	1	2	Bma-kin-1	MS
WBGene00226009	0.008082975	-0.081205491	0.295	0.245	1	2	Bm5748	MS
WBGene00225737	0.008163431	-0.086057452	0.151	0.12	1	2	Bm5476	MS
WBGene00225967	0.008222059	-0.028827193	0.126	0.099	1	2	Bma-pcbd-1	MS
WBGene00227965	0.008554161	-0.064031992	0.117	0.091	1	2	Bma-xrn-2	MS
WBGene00222744	0.0085799	-0.028895607	0.125	0.099	1	2	Bma-rpn-3	MS
WBGene00228481	0.008668577	8.80E-05	0.158	0.128	1	2	Bm8220	MS
WBGene00226328	0.008709991	-0.124875487	0.156	0.123	1	2	Bm6067	MS
WBGene00228921	0.00873375	-0.02348178	0.584	0.495	1	2	Bma-asp-4	MS
WBGene00231220	0.00878474	-0.041065854	0.107	0.083	1	2	Bm10959	MS
WBGene00226398	0.008805458	-0.128203289	0.13	0.102	1	2	Bma-unc-37	MS
WBGene00227358	0.008885787	-0.02927849	0.163	0.131	1	2	Bma-shl-1	MS
WBGene00227295	0.008989961	-0.011948929	0.533	0.464	1	2	Bma-rpl-1	MS
WBGene00234157	0.009074564	-0.0300986	0.541	0.47	1	2	Bma-rps-11	MS
WBGene00223943	0.009197172	-0.064130153	0.235	0.19	1	2	Bma-cpn-3	MS
WBGene00224614	0.009210382	0.038928208	0.106	0.083	1	2	Bm4353	MS
WBGene00222330	0.009412433	-0.006265174	0.132	0.105	1	2	Bma-ubh-4	MS
WBGene00224928	0.009626452	-0.012613773	0.15	0.119	1	2	Bma-mbf-1	MS
WBGene00224486	0.009665936	-0.102631503	0.139	0.11	1	2	Bm4225	MS
WBGene00231250	0.009713766	0.017674317	0.177	0.143	1	2	Bm10989	MS
WBGene00234116	0.009736573	-0.059531901	0.206	0.166	1	2	Bma-mdh-2	MS
WBGene00227158	0.009773997	-0.001830888	0.107	0.083	1	2	Bm6897	MS
WBGene00230473	0.009871802	0.037725284	0.105	0.082	1	2	Bm10212	MS
WBGene00234035	0.009872417	-0.037238533	0.53	0.452	1	2	Bma-rpl-10.2	MS
WBGene00224021	0.010012141	-0.059020103	0.258	0.212	1	2	Bma-fipp-1	MS
WBGene00234935	0.010086508	0.028976467	0.111	0.087	1	2	Bm14750	MS
WBGene00224807	0.010371956	-0.057314648	0.14	0.112	1	2	Bm4546	MS
WBGene00233181	0.010452149	-0.014778382	0.599	0.517	1	2	Bm12920	MS
WBGene00231081	0.010460143	-0.006456705	0.104	0.081	1	2	Bm10820	MS
WBGene00224146	0.010706036	-0.041407268	0.131	0.103	1	2	Bma-isw-1	MS
WBGene00227642	0.010807211	-0.015100007	0.13	0.103	1	2	Bma-twk-8	MS
WBGene00227926	0.010822169	-0.022608353	0.123	0.097	1	2	Bm7665	MS
WBGene00224566	0.0109615	-0.007635019	0.13	0.103	1	2	Bm4305	MS
WBGene00232281	0.010962279	0.020077722	0.102	0.079	1	2	Bma-tim-1	MS
WBGene00224784	0.011120423	-0.080414019	0.145	0.117	1	2	Bm4523	MS
WBGene00234330	0.011126317	-0.064467725	0.14	0.111	1	2	Bm14069	MS
WBGene00230033	0.011477544	-0.005217213	0.122	0.097	1	2	Bma-casc-3.1	MS
WBGene00222030	0.011651255	0.003451774	0.171	0.139	1	2	Bma-ife-3	MS
WBGene00234029	0.011697456	-0.004227555	0.691	0.622	1	2	Bma-rla-0	MS
WBGene00233137	0.011901428	-0.018964569	0.154	0.125	1	2	Bma-glrx-10	MS
WBGene00223652	0.012355615	-0.102591393	0.331	0.271	1	2	Bma-dys-1	MS
WBGene00224217	0.012481018	0.010672423	0.108	0.086	1	2	Bma-mage-1	MS
WBGene00222814	0.012756989	-0.046699	0.115	0.092	1	2	Bma-spcs-1	MS
WBGene00234055	0.012820942	0.00973066	0.113	0.089	1	2	Bma-mppb-1	MS
WBGene00224919	0.012838876	-0.070972203	0.127	0.101	1	2	Bma-erfa-3	MS
WBGene00223499	0.012841668	0.036181537	0.119	0.094	1	2	Bma-nmad-1	MS
WBGene00225823	0.012928059	-0.13474394	0.176	0.144	1	2	Bma-rad-50	MS
WBGene00222676	0.01295401	-0.079787069	0.175	0.142	1	2	Bma-wdfy-3	MS
WBGene00226685	0.013246921	-0.010694181	0.132	0.105	1	2	Bm6424	MS
WBGene00225588	0.013531741	-0.089197336	0.132	0.106	1	2	Bm5327	MS
WBGene00269063	0.013539329	-0.05020584	0.103	0.08	1	2	Bma-ttr-35	MS
WBGene00227150	0.013541006	-0.071304676	0.21	0.173	1	2	Bma-pqn-87	MS
WBGene00225845	0.013713946	-0.063784191	0.261	0.216	1	2	Bma-enpl-1	MS
WBGene00225697	0.013740433	-0.045571144	0.2	0.163	1	2	Bm5436	MS
WBGene00226985	0.013765142	-0.024482564	0.235	0.192	1	2	Bm6724	MS
WBGene00222456	0.013783376	-0.044223883	0.243	0.201	1	2	Bm2195	MS
WBGene00223748	0.013918168	-0.052829937	0.188	0.153	1	2	Bma-mrps-33	MS
WBGene00227410	0.014098287	0.02871808	0.133	0.107	1	2	Bma-xpc-1.1	MS
WBGene00231980	0.014113139	-0.061632413	0.145	0.116	1	2	Bma-nlg-1	MS
WBGene00225415	0.015100149	0.041401591	0.929	0.888	1	2	Bma-nduo-4	MS
WBGene00234060	0.01517343	0.028236378	0.161	0.133	1	2	Bma-rfc-2	MS
WBGene00234159	0.015179214	0.027493723	0.617	0.553	1	2	Bm13898	MS
WBGene00220740	0.015198695	-0.023672418	0.187	0.153	1	2	Bm479	MS
WBGene00227836	0.015339461	-0.082010604	0.219	0.177	1	2	Bma-dpy-30	MS
WBGene00227461	0.015453093	-0.015714763	0.249	0.206	1	2	Bma-ubxn-2	MS
WBGene00225350	0.01573138	-0.043022686	0.253	0.209	1	2	Bma-calu-1	MS
WBGene00228676	0.0157714	-0.069339813	0.111	0.088	1	2	Bm8415	MS
WBGene00222192	0.015776626	-0.017625804	0.141	0.113	1	2	Bma-kin-19	MS
WBGene00225337	0.015919797	-0.083485172	0.281	0.232	1	2	Bma-gei-15	MS
WBGene00224257	0.015962213	-0.041409519	0.45	0.379	1	2	Bm3996	MS
WBGene00269280	0.016051187	-0.074505683	0.169	0.138	1	2	Bm18140	MS
WBGene00233927	0.01614014	-0.068885593	0.136	0.109	1	2	Bma-pbs-2	MS
WBGene00228694	0.016153667	-0.159474971	0.118	0.093	1	2	Bma-gon-2	MS
WBGene00223366	0.016510508	0.035920731	0.139	0.114	1	2	Bm3105	MS
WBGene00222921	0.016515608	0.011429148	0.132	0.107	1	2	Bma-slc-17.2.2	MS
WBGene00227814	0.016704908	-0.043854248	0.138	0.111	1	2	Bm7553	MS
WBGene00226002	0.0169217	-0.084403438	0.104	0.082	1	2	Bma-set-16	MS
WBGene00226991	0.017287027	-0.021306397	0.214	0.178	1	2	Bma-alkb-1	MS
WBGene00225728	0.017312714	0.070057735	0.129	0.105	1	2	Bma-got-1.2	MS
WBGene00224047	0.017507834	-0.076444296	0.102	0.08	1	2	Bma-tsp-8	MS
WBGene00227370	0.017584785	-0.134140194	0.12	0.095	1	2	Bm7109	MS
WBGene00230945	0.017685613	-0.092091941	0.208	0.17	1	2	Bm10684	MS
WBGene00230633	0.017816462	-0.088677701	0.378	0.318	1	2	Bm10372	MS
WBGene00222040	0.017843707	-0.075673016	0.181	0.149	1	2	Bma-eat-6	MS
WBGene00222835	0.017979209	-0.076861996	0.19	0.157	1	2	Bma-hecd-1	MS
WBGene00234017	0.018028842	-0.128512002	0.103	0.081	1	2	Bm13756	MS
WBGene00224427	0.018114321	-0.093842342	0.1	0.079	1	2	Bm4166	MS
WBGene00231447	0.018217332	-0.059393299	0.391	0.328	1	2	Bma-myo-3	MS
WBGene00226006	0.01824977	0.077596851	0.102	0.081	1	2	Bma-mlc-5	MS
WBGene00222011	0.018298338	-0.051151339	0.34	0.282	1	2	Bma-hlh-1	MS
WBGene00224972	0.018320657	-0.006460745	0.398	0.345	1	2	Bm4711	MS
WBGene00226344	0.019085946	-0.055648798	0.438	0.366	1	2	Bm6083	MS
WBGene00227379	0.019116515	-0.215968063	0.579	0.544	1	2	Bma-ccg-1	MS
WBGene00223114	0.019423047	-0.00408838	0.655	0.58	1	2	Bma-rps-2.1	MS
WBGene00223536	0.019855533	-0.032007201	0.133	0.107	1	2	Bm3275	MS
WBGene00222459	0.020026258	-0.042712424	0.404	0.339	1	2	Bma-rpl-21	MS
WBGene00223568	0.020074463	-0.153006011	0.853	0.821	1	2	Bm3307	MS
WBGene00225677	0.020231577	-0.061498317	0.101	0.08	1	2	Bma-pqn-59	MS
WBGene00223283	0.020463625	-0.119081596	0.247	0.205	1	2	Bma-unc-120	MS
WBGene00222619	0.020588369	-0.150377456	0.239	0.198	1	2	Bma-dao-5	MS
WBGene00224622	0.020643071	-0.053618011	0.171	0.14	1	2	Bma-gtf-2E2	MS
WBGene00231120	0.02064392	-0.066394505	0.137	0.11	1	2	Bm10859	MS
WBGene00227304	0.021282619	-0.056739605	0.143	0.116	1	2	Bma-yop-1	MS
WBGene00233968	0.021397175	0.000960369	0.123	0.101	1	2	Bma-cct-8	MS
WBGene00222119	0.021614208	-0.085303388	0.234	0.193	1	2	Bm1858	MS
WBGene00228620	0.021920469	0.041359356	0.121	0.099	1	2	Bm8359	MS
WBGene00224797	0.022093723	-0.106219345	0.319	0.267	1	2	Bm4536	MS
WBGene00226805	0.02217057	-0.07129883	0.345	0.29	1	2	Bm6544	MS
WBGene00223746	0.02219584	-0.03851901	0.381	0.316	1	2	Bm3485	MS
WBGene00223858	0.022246424	-0.004785005	0.102	0.082	1	2	Bm3597	MS
WBGene00232899	0.022540724	-0.000846306	0.102	0.082	1	2	Bma-cars-1.2	MS
WBGene00222234	0.022579696	-0.009984089	0.122	0.098	1	2	Bma-ife-4	MS
WBGene00224889	0.022797023	-0.014431574	0.55	0.473	1	2	Bm4628	MS
WBGene00222688	0.023200162	-0.072866889	0.1	0.08	1	2	Bma-rad-26	MS
WBGene00223259	0.023506799	-0.00138695	0.606	0.536	1	2	Bma-rps-10	MS
WBGene00228455	0.023631935	-0.050309016	0.158	0.132	1	2	Bma-dph-1	MS
WBGene00225193	0.023810247	-0.063758337	0.155	0.127	1	2	Bma-cif-1	MS
WBGene00222963	0.024067136	-0.071643078	0.108	0.086	1	2	Bma-rgs-6	MS
WBGene00224640	0.024087897	-0.112225049	0.133	0.108	1	2	Bma-zfp-1	MS
WBGene00226154	0.024104776	-0.05574744	0.267	0.222	1	2	Bma-pat-6	MS
WBGene00226532	0.024339156	-0.085105039	0.137	0.111	1	2	Bma-nduf-7	MS
WBGene00224356	0.02442588	-0.124715209	0.147	0.12	1	2	Bma-tdp-1.2	MS
WBGene00231409	0.024545519	-0.064151211	0.118	0.095	1	2	Bma-cdkr-3	MS
WBGene00230366	0.024586404	-0.098820883	0.156	0.129	1	2	Bm10105	MS
WBGene00224408	0.024833525	-0.010169763	0.103	0.082	1	2	Bma-mdh-1	MS
WBGene00228685	0.025299346	-0.071751215	0.162	0.133	1	2	Bm8424	MS
WBGene00228007	0.025422694	-0.145509262	0.184	0.153	1	2	Bm7746	MS
WBGene00228782	0.025484649	-0.05404304	0.106	0.085	1	2	Bm8521	MS
WBGene00234306	0.025663202	-0.070428921	0.55	0.472	1	2	Bma-rps-9	MS
WBGene00221989	0.025779716	-0.053426946	0.273	0.227	1	2	Bma-mrpl-47	MS
WBGene00229798	0.026014658	-0.170521039	0.157	0.129	1	2	Bma-npp-14	MS
WBGene00221961	0.026039671	-0.035694169	0.644	0.564	1	2	Bma-rpl-4	MS
WBGene00227200	0.026214486	-0.016538307	0.128	0.104	1	2	Bma-unc-51	MS
WBGene00233074	0.026248369	-0.047279608	0.123	0.1	1	2	Bm12813	MS
WBGene00223411	0.026414215	-0.041562511	0.172	0.142	1	2	Bma-asb-1	MS
WBGene00234950	0.026802759	-0.170668095	0.277	0.229	1	2	Bm14765	MS
WBGene00223552	0.02697502	-0.034790858	0.196	0.163	1	2	Bma-eif-2Bdelta	MS
WBGene00226348	0.027154582	-0.088408567	0.14	0.114	1	2	Bm6087	MS
WBGene00223323	0.027333897	0.02373697	0.179	0.151	1	2	Bma-ppfr-2	MS
WBGene00226764	0.027918695	-0.014100635	0.171	0.141	1	2	Bma-lbp-9	MS
WBGene00233096	0.028208473	-0.085591798	0.199	0.166	1	2	Bm12835	MS
WBGene00222318	0.028464134	-0.097042845	0.18	0.15	1	2	Bm2057	MS
WBGene00227251	0.028739491	-0.158941058	0.264	0.216	1	2	Bma-fln-1.1	MS
WBGene00224132	0.02896849	-0.147097819	0.242	0.203	1	2	Bma-rbpl-1	MS
WBGene00234315	0.029171983	0.023324695	0.102	0.083	1	2	Bma-spcs-3	MS
WBGene00231182	0.029468357	-0.009134769	0.159	0.133	1	2	Bma-tdp-1.3	MS
WBGene00224922	0.029595675	-0.078063436	0.121	0.098	1	2	Bma-athp-2	MS
WBGene00224686	0.029919293	-0.064677239	0.603	0.514	1	2	Bm4425	MS
WBGene00229976	0.030096328	-0.063052697	0.12	0.097	1	2	Bm9715	MS
WBGene00233966	0.030430815	0.007758503	0.138	0.114	1	2	Bma-cct-6	MS
WBGene00223190	0.030705524	-0.18162759	0.16	0.132	1	2	Bma-cca-1	MS
WBGene00227208	0.030728773	0.026439187	0.113	0.093	1	2	Bm6947	MS
WBGene00227218	0.03079336	-0.039681982	0.28	0.238	1	2	Bm6957	MS
WBGene00225664	0.030857633	-0.047358398	0.236	0.197	1	2	Bm5403	MS
WBGene00231253	0.031356019	-0.055746166	0.113	0.092	1	2	Bm10992	MS
WBGene00222349	0.03162346	-0.057711367	0.416	0.352	1	2	Bma-hsp-25	MS
WBGene00226443	0.031696711	-0.083704527	0.115	0.093	1	2	Bma-rbm-25	MS
WBGene00224103	0.032387076	-0.01543876	0.107	0.086	1	2	Bma-marb-1	MS
WBGene00222108	0.033577764	-0.037674737	0.204	0.17	1	2	Bm1847	MS
WBGene00221310	0.033694942	-0.035103857	0.105	0.085	1	2	Bm1049	MS
WBGene00225292	0.03374591	-0.073674744	0.108	0.088	1	2	Bma-ostd-1	MS
WBGene00223026	0.034117407	-0.035780896	0.103	0.083	1	2	Bma-twk-17	MS
WBGene00234979	0.034343801	-0.112697672	0.125	0.102	1	2	Bm14794	MS
WBGene00224649	0.034601946	-0.034349177	0.104	0.084	1	2	Bm4388	MS
WBGene00223902	0.034815006	-0.032640576	0.147	0.122	1	2	Bma-nurf-1	MS
WBGene00234579	0.034821906	-0.077757019	0.126	0.104	1	2	Bma-swp-1	MS
WBGene00234347	0.034928794	-0.001691439	0.104	0.084	1	2	Bm14086	MS
WBGene00235046	0.035225085	-0.048942008	0.127	0.104	1	2	Bma-unc-60	MS
WBGene00233925	0.035279888	-0.024195445	0.214	0.181	1	2	Bma-eif-3.G	MS
WBGene00229465	0.035728795	-0.069473834	0.361	0.302	1	2	Bm9204	MS
WBGene00223985	0.035869368	-0.057868954	0.476	0.407	1	2	Bma-fkb-6	MS
WBGene00231170	0.036557871	-0.015555809	0.163	0.136	1	2	Bm10909	MS
WBGene00223764	0.036871355	-0.120325312	0.118	0.095	1	2	Bma-ttr-36	MS
WBGene00234275	0.036875897	-0.050115287	0.116	0.095	1	2	Bm14014	MS
WBGene00223050	0.036999832	-0.153604577	0.136	0.112	1	2	Bma-wnk-1	MS
WBGene00234018	0.037268413	-0.061020571	0.334	0.284	1	2	Bma-rpt-1	MS
WBGene00234023	0.037490829	-0.097574706	0.212	0.177	1	2	Bm13762	MS
WBGene00231575	0.037541937	-0.18425978	0.246	0.204	1	2	Bma-ketn-1	MS
WBGene00224994	0.037687666	-0.090032964	0.373	0.314	1	2	Bma-ben-1	MS
WBGene00226341	0.037877675	-0.051074191	0.155	0.128	1	2	Bm6080	MS
WBGene00225275	0.038669257	-0.025887972	0.375	0.319	1	2	Bm5014	MS
WBGene00223932	0.038821371	-0.011021749	0.716	0.652	1	2	Bma-rpl-26	MS
WBGene00232819	0.039032434	-0.076957954	0.183	0.153	1	2	Bm12558	MS
WBGene00223246	0.039634061	-0.021165373	0.146	0.121	1	2	Bma-rpn-13	MS
WBGene00224153	0.040425854	-0.016603708	0.141	0.118	1	2	Bma-yju-2	MS
WBGene00226696	0.040894771	-0.104337863	0.142	0.118	1	2	Bma-trap-3	MS
WBGene00224220	0.041429091	-0.141332989	0.134	0.109	1	2	Bma-csq-1	MS
WBGene00224552	0.041753974	-0.091219929	0.109	0.089	1	2	Bm4291	MS
WBGene00227646	0.042155363	-0.173095613	0.644	0.608	1	2	Bm7385	MS
WBGene00224044	0.042235805	-0.09700149	0.259	0.214	1	2	Bma-sdhd-1	MS
WBGene00231306	0.042846129	-0.077833948	0.301	0.252	1	2	Bma-tps-2	MS
WBGene00227298	0.042925738	-0.07674336	0.221	0.187	1	2	Bm7037	MS
WBGene00228586	0.043440277	-0.137206417	0.125	0.103	1	2	Bm8325	MS
WBGene00225029	0.043468604	-0.044953195	0.105	0.085	1	2	Bma-rnp-5	MS
WBGene00229735	0.043586042	-0.040183635	0.133	0.11	1	2	Bm9474	MS
WBGene00230764	0.04404499	-0.035665534	0.327	0.282	1	2	Bm10503	MS
WBGene00225786	0.044609177	-0.065240778	0.317	0.267	1	2	Bm5525	MS
WBGene00226830	0.04497349	-0.018350092	0.165	0.139	1	2	Bma-lact-9	MS
WBGene00225639	0.04597344	-0.027143697	0.295	0.254	1	2	Bma-rpl-9	MS
WBGene00223707	0.046015184	-0.101496816	0.1	0.081	1	2	Bma-grk-1.2	MS
WBGene00231041	0.046071232	0.018106425	0.543	0.49	1	2	Bm10780	MS
WBGene00225684	0.04621586	-0.065165208	0.131	0.109	1	2	Bma-larp-1	MS
WBGene00221312	0.046737883	-0.10199871	0.296	0.251	1	2	Bm1051	MS
WBGene00234153	0.047919095	-0.034549454	0.129	0.108	1	2	Bm13892	MS
WBGene00233918	0.048368094	-0.111734371	0.257	0.218	1	2	Bma-sar-1	MS
WBGene00268224	0.048618436	-0.079404142	0.124	0.103	1	2	Bma-zhit-1	MS
WBGene00221945	0.048638966	-0.131432558	0.157	0.131	1	2	Bma-crm-1	MS
WBGene00227873	0.04864196	-0.164603588	0.149	0.123	1	2	Bma-ccdc-47	MS
WBGene00222291	0.049054942	-0.072233997	0.16	0.134	1	2	Bma-atp-5	MS
WBGene00225315	0.049117313	-0.004508381	0.116	0.097	1	2	Bma-mrpl-35	MS
WBGene00225841	0.049875418	-0.084746414	0.397	0.333	1	2	Bma-aldo-1	MS
WBGene00222044	0.050352914	-0.019802966	0.678	0.617	1	2	Bma-rps-0	MS
WBGene00232592	0.050664977	-0.093338053	0.11	0.091	1	2	Bm12331	MS
WBGene00228298	0.050734985	-0.115665604	0.257	0.216	1	2	Bma-unc-82	MS
WBGene00223325	0.051730738	-0.125457715	0.125	0.104	1	2	Bma-maco-1	MS
WBGene00226322	0.052016115	-0.083062789	0.365	0.311	1	2	Bm6061	MS
WBGene00304805	0.052031171	-0.053332044	0.165	0.138	1	2	Bm18602	MS
WBGene00226961	0.052609616	-0.070422223	0.261	0.222	1	2	Bm6700	MS
WBGene00222077	0.052942933	-0.091453081	0.12	0.099	1	2	Bma-spk-1	MS
WBGene00230321	0.053294121	-0.088454479	0.105	0.086	1	2	Bm10060	MS
WBGene00225935	0.053454845	-0.0371397	0.159	0.133	1	2	Bma-mrpl-23	MS
WBGene00226644	0.054455017	-0.083171156	0.167	0.14	1	2	Bma-cox-5A	MS
WBGene00224906	0.054486987	-0.024026547	0.122	0.102	1	2	Bm4645	MS
WBGene00233961	0.054537959	-0.123643599	0.215	0.181	1	2	Bma-ddx-17	MS
WBGene00225942	0.054715471	-0.037647093	0.102	0.084	1	2	Bma-rhgf-2	MS
WBGene00226957	0.054921239	-0.117124952	0.101	0.083	1	2	Bma-cccp-1	MS
WBGene00225877	0.055711882	-0.122608954	0.218	0.183	1	2	Bm5616	MS
WBGene00223669	0.05631652	-0.017228107	0.107	0.089	1	2	Bma-ctnb-1	MS
WBGene00225613	0.056616153	-0.059271979	0.12	0.1	1	2	Bma-dpf-5	MS
WBGene00224214	0.056830419	-0.105173449	0.327	0.276	1	2	Bm3953	MS
WBGene00222464	0.05706287	-0.136272185	0.429	0.361	1	2	Bm2203	MS
WBGene00226956	0.058040629	-0.054722713	0.119	0.099	1	2	Bma-pstk-1	MS
WBGene00225549	0.058996561	-0.169621937	0.233	0.196	1	2	Bma-npp-21	MS
WBGene00234046	0.0590796	-0.078820333	0.435	0.37	1	2	Bma-abcf-2	MS
WBGene00225576	0.059349299	-0.086272896	0.123	0.103	1	2	Bma-ebax-1	MS
WBGene00222878	0.059579253	0.003877789	0.116	0.097	1	2	Bm2617	MS
WBGene00225233	0.059809957	-0.132537956	0.251	0.214	1	2	Bma-spc-1	MS
WBGene00234310	0.060429672	-0.029290083	0.798	0.73	1	2	Bma-rps-7	MS
WBGene00255534	0.06154007	-0.105058475	0.242	0.206	1	2	Bm16932	MS
WBGene00223218	0.061745049	-0.066926642	0.128	0.108	1	2	Bm2957	MS
WBGene00234289	0.062906379	-0.025888252	0.867	0.817	1	2	Bma-rpl-16	MS
WBGene00231226	0.063127472	-0.044841033	0.342	0.293	1	2	Bm10965	MS
WBGene00230563	0.063360196	-0.107054512	0.476	0.408	1	2	Bm10302	MS
WBGene00223711	0.063695145	-0.040903898	0.126	0.107	1	2	Bma-sart-1	MS
WBGene00222084	0.063883821	-0.119542405	0.273	0.23	1	2	Bm1823	MS
WBGene00229501	0.065207871	-0.055399855	0.168	0.142	1	2	Bm9240	MS
WBGene00234283	0.066244943	-0.118658115	0.28	0.236	1	2	Bm14022	MS
WBGene00234032	0.066256449	-0.038945635	0.589	0.518	1	2	Bma-rpl-20	MS
WBGene00222977	0.066304859	-0.085957708	0.176	0.15	1	2	Bm2716	MS
WBGene00223393	0.066337406	-0.19480883	0.141	0.118	1	2	Bma-ddx-23	MS
WBGene00225444	0.066866152	-0.129342306	0.206	0.175	1	2	Bma-osg-1	MS
WBGene00222671	0.067886255	-0.060339273	0.656	0.569	1	2	Bma-rps-30	MS
WBGene00226209	0.06801521	-0.126450872	0.166	0.141	1	2	Bma-eif-3.C	MS
WBGene00221236	0.068672105	-0.097227873	0.108	0.09	1	2	Bm975	MS
WBGene00227507	0.068817926	-0.137600149	0.323	0.27	1	2	Bm7246	MS
WBGene00228684	0.068910876	-0.093190509	0.128	0.107	1	2	Bm8423	MS
WBGene00221963	0.06940573	-0.156058681	0.151	0.127	1	2	Bma-xnp-1	MS
WBGene00224712	0.070357782	-0.056673105	0.168	0.144	1	2	Bm4451	MS
WBGene00221841	0.070461231	-0.110887713	0.174	0.148	1	2	Bm1580	MS
WBGene00222714	0.071227647	-0.101079373	0.274	0.237	1	2	Bma-bcl-7	MS
WBGene00226632	0.071854169	-0.141490458	0.23	0.196	1	2	Bma-ccar-1	MS
WBGene00225577	0.072353578	-0.104117045	0.163	0.138	1	2	Bma-sti-1	MS
WBGene00303174	0.0732147	-0.128136514	0.116	0.099	1	2	Bm18562	MS
WBGene00304241	0.074664287	-0.128513054	0.154	0.131	1	2	Bm18583	MS
WBGene00234963	0.076212552	-0.132722105	0.322	0.273	1	2	Bma-hip-1	MS
WBGene00221966	0.076670502	-0.052401019	0.388	0.337	1	2	Bma-kin-3	MS
WBGene00234135	0.077916774	-0.106589277	0.223	0.19	1	2	Bma-fib-1	MS
WBGene00227801	0.078083257	-0.18959651	0.633	0.582	1	2	Bm7540	MS
WBGene00227337	0.07863065	-0.090698526	0.274	0.234	1	2	Bma-swsn-3	MS
WBGene00225396	0.078640686	-0.153098983	0.111	0.092	1	2	Bma-ifg-1	MS
WBGene00233931	0.079849459	-0.084116238	0.104	0.086	1	2	Bma-pbs-4	MS
WBGene00225405	0.080106673	-0.129159079	0.299	0.258	1	2	Bma-hil-1	MS
WBGene00222884	0.081259205	-0.060434129	0.136	0.116	1	2	Bma-acs-19	MS
WBGene00226161	0.08295436	-0.119491068	0.152	0.13	1	2	Bma-asd-2	MS
WBGene00234117	0.083059145	-0.053104377	0.1	0.084	1	2	Bma-rpn-5	MS
WBGene00227390	0.084456981	-0.127889132	0.167	0.142	1	2	Bma-lgc-27	MS
WBGene00228781	0.085593766	-0.088699373	0.12	0.101	1	2	Bm8520	MS
WBGene00226158	0.086895945	-0.154170941	0.18	0.154	1	2	Bma-dhc-1	MS
WBGene00223825	0.087169425	-0.055156679	0.442	0.386	1	2	Bma-ubq-1	MS
WBGene00224080	0.088074805	-0.172041498	0.11	0.093	1	2	Bma-ptrn-1	MS
WBGene00234977	0.088124875	-0.130887439	0.239	0.203	1	2	Bma-mca-3.1	MS
WBGene00225130	0.08843532	-0.086544906	0.166	0.141	1	2	Bma-nol-56	MS
WBGene00226759	0.088697243	-0.058345456	0.109	0.092	1	2	Bm6498	MS
WBGene00231083	0.09074647	-0.223335494	0.289	0.245	1	2	Bma-dig-1	MS
WBGene00224579	0.091662263	-0.182834291	0.172	0.145	1	2	Bma-pqn-42	MS
WBGene00224389	0.091738972	-0.069158655	0.495	0.428	1	2	Bma-ned-8	MS
WBGene00234039	0.092809685	-0.104761207	0.159	0.135	1	2	Bm13778	MS
WBGene00222283	0.093618319	-0.153789018	0.172	0.146	1	2	Bm2022	MS
WBGene00231066	0.093846851	-0.078866475	0.158	0.135	1	2	Bm10805	MS
WBGene00227621	0.094862403	-0.170666723	0.24	0.204	1	2	Bm7360	MS
WBGene00225369	0.095941974	-0.16347363	0.109	0.091	1	2	Bma-let-70.2	MS
WBGene00222152	0.09703642	-0.077148787	0.117	0.099	1	2	Bma-let-526	MS
WBGene00234274	0.098463282	-0.078111701	0.143	0.123	1	2	Bm14013	MS
WBGene00224533	0.098664114	-0.215668588	0.225	0.191	1	2	Bm4272	MS
WBGene00226568	0.098989252	-0.063174871	0.139	0.12	1	2	Bm6307	MS
WBGene00226484	0.099931488	-0.166464488	0.125	0.105	1	2	Bma-gei-4	MS
WBGene00227594	0.100475307	-0.143655809	0.127	0.108	1	2	Bma-set-30	MS
WBGene00234288	0.100959514	-0.055477864	0.114	0.097	1	2	Bm14027	MS
WBGene00231155	0.101370802	-0.115123077	0.162	0.138	1	2	Bm10894	MS
WBGene00223122	0.102394996	-0.069185887	0.114	0.097	1	2	Bma-unc-36	MS
WBGene00224213	0.102519885	-0.093661553	0.155	0.133	1	2	Bm3952	MS
WBGene00236803	0.103779775	-0.092542709	0.102	0.086	1	2	Bma-cfp-1	MS
WBGene00226271	0.103839501	-0.172914525	0.321	0.269	1	2	Bma-clik-1	MS
WBGene00221138	0.10604559	-0.158820005	0.183	0.154	1	2	Bm877	MS
WBGene00225980	0.107527415	-0.141178443	0.113	0.096	1	2	Bma-eea-1	MS
WBGene00234146	0.107972481	-0.098676015	0.139	0.118	1	2	Bma-atp-3	MS
WBGene00221940	0.108518953	-0.068740489	0.333	0.284	1	2	Bma-trx-2	MS
WBGene00224923	0.108597248	-0.126592205	0.138	0.117	1	2	Bma-madf-3	MS
WBGene00226819	0.108675796	-0.065893283	0.113	0.096	1	2	Bm6558	MS
WBGene00224992	0.110384213	-0.104010593	0.254	0.22	1	2	Bma-ran-1	MS
WBGene00227498	0.111810342	-0.091697733	0.478	0.419	1	2	Bma-rps-20	MS
WBGene00224165	0.112127349	-0.129416788	0.103	0.087	1	2	Bma-dnj-11	MS
WBGene00269363	0.112654826	-0.162271019	0.115	0.097	1	2	Bma-bicd-1	MS
WBGene00225788	0.112797301	-0.043169915	0.662	0.596	1	2	Bma-nifk-1	MS
WBGene00223328	0.113792665	-0.11861541	0.375	0.322	1	2	Bma-nap-1	MS
WBGene00222993	0.116877109	-0.05265009	0.102	0.087	1	2	Bm2732	MS
WBGene00222382	0.117135382	-0.047990798	0.107	0.091	1	2	Bma-nuo-1	MS
WBGene00224354	0.121135441	-0.100276508	0.264	0.225	1	2	Bm4093	MS
WBGene00220757	0.121521195	-0.133334746	0.209	0.179	1	2	Bm496	MS
WBGene00223446	0.123735149	-0.114282337	0.162	0.139	1	2	Bma-calu-2	MS
WBGene00230582	0.125137308	-0.072554573	0.281	0.245	1	2	Bm10321	MS
WBGene00226565	0.126059792	-0.093865615	0.206	0.179	1	2	Bm6304	MS
WBGene00233980	0.126125247	-0.068145103	0.572	0.505	1	2	Bma-rps-13	MS
WBGene00233938	0.127822024	-0.108249267	0.155	0.133	1	2	Bma-pbs-7	MS
WBGene00234999	0.128759257	-0.121559478	0.103	0.088	1	2	Bm14814	MS
WBGene00229305	0.129896708	-0.260435542	0.182	0.157	1	2	Bm9044	MS
WBGene00227718	0.131290285	-0.125210542	0.105	0.089	1	2	Bm7457	MS
WBGene00226345	0.131498745	-0.068228554	0.425	0.364	1	2	Bma-npa-1	MS
WBGene00230268	0.131963835	-0.04443593	0.109	0.093	1	2	Bm10007	MS
WBGene00234147	0.13328816	-0.076978015	0.147	0.128	1	2	Bma-vha-8	MS
WBGene00233914	0.133316576	-0.070666655	0.783	0.712	1	2	Bm13653	MS
WBGene00223087	0.1348787	-0.13867303	0.107	0.091	1	2	Bma-pitr-1	MS
WBGene00228830	0.140108992	-0.151638292	0.153	0.131	1	2	Bm8569	MS
WBGene00232401	0.14162043	-0.160582778	0.144	0.123	1	2	Bma-mxt-1	MS
WBGene00224722	0.144350244	-0.178530878	0.135	0.115	1	2	Bm4461	MS
WBGene00223407	0.145284342	-0.101645108	0.803	0.767	1	2	Bma-far-1	MS
WBGene00222641	0.1466698	-0.118821647	0.104	0.088	1	2	Bm2380	MS
WBGene00229500	0.149329936	-0.053630637	0.665	0.601	1	2	Bma-rpl-7A.3	MS
WBGene00229479	0.153123574	-0.122944369	0.114	0.097	1	2	Bm9218	MS
WBGene00222356	0.153310886	-0.03378717	0.665	0.599	1	2	Bma-rpl-19	MS
WBGene00233190	0.153683051	-0.062771896	0.392	0.35	1	2	Bma-rps-19.1	MS
WBGene00226585	0.154642157	-0.207533523	0.116	0.099	1	2	Bma-emb-9	MS
WBGene00222465	0.155954355	-0.128821156	0.166	0.143	1	2	Bma-sfxn-2	MS
WBGene00224890	0.158138003	-0.124833955	0.13	0.111	1	2	Bm4629	MS
WBGene00234202	0.15985749	-0.113185906	0.49	0.43	1	2	Bma-rpl-2	MS
WBGene00226354	0.160329102	-0.172946657	0.157	0.135	1	2	Bma-nuo-6	MS
WBGene00229828	0.160895435	-0.144766597	0.127	0.109	1	2	Bm9567	MS
WBGene00220280	0.161024391	-0.203479083	0.139	0.119	1	2	Bm19	MS
WBGene00227230	0.161654103	-0.11685905	0.1	0.086	1	2	Bma-cus-2	MS
WBGene00232452	0.162261198	-0.221633983	0.107	0.092	1	2	Bma-dnj-5	MS
WBGene00224653	0.163535407	-0.14117534	0.101	0.086	1	2	Bma-stau-1	MS
WBGene00224576	0.165654238	-0.173135207	0.151	0.13	1	2	Bm4315	MS
WBGene00223563	0.166862381	-0.11871492	0.14	0.122	1	2	Bm3302	MS
WBGene00222643	0.168113012	-0.158834603	0.222	0.194	1	2	Bma-mdt-26	MS
WBGene00222976	0.169698005	-0.213898404	0.23	0.201	1	2	Bma-acin-1	MS
WBGene00223142	0.171375729	-0.16450819	0.228	0.195	1	2	Bm2881	MS
WBGene00224793	0.174020448	-0.064419195	0.111	0.097	1	2	Bma-unc-24	MS
WBGene00231492	0.177340434	-0.194406203	0.178	0.155	1	2	Bma-hum-7	MS
WBGene00223894	0.177980254	-0.229232044	0.205	0.178	1	2	Bm3633	MS
WBGene00228185	0.181326664	-0.255588576	0.191	0.165	1	2	Bm7924	MS
WBGene00225008	0.183047326	-0.051470092	0.717	0.651	1	2	Bma-rps-25	MS
WBGene00226785	0.184131411	-0.169235734	0.177	0.155	1	2	Bma-hrpu-1	MS
WBGene00233924	0.185206871	-0.153195784	0.37	0.323	1	2	Bma-hsp-110	MS
WBGene00225703	0.189237405	-0.085372017	0.107	0.094	1	2	Bma-pro-1	MS
WBGene00234303	0.192184746	-0.057176555	0.468	0.414	1	2	Bma-rps-5	MS
WBGene00226588	0.192357086	-0.10055856	0.452	0.393	1	2	Bma-hsp-60	MS
WBGene00235048	0.193176452	-0.089639092	0.42	0.367	1	2	Bm14713	MS
WBGene00221769	0.1995199	-0.099424789	0.131	0.114	1	2	Bm1508	MS
WBGene00230485	0.204233078	-0.105311108	0.107	0.093	1	2	Bm10224	MS
WBGene00223530	0.214526055	-0.081037152	0.112	0.099	1	2	Bm3269	MS
WBGene00225899	0.218669999	-0.04693314	0.495	0.44	1	2	Bm5638	MS
WBGene00225804	0.219918271	-0.156737142	0.104	0.09	1	2	Bma-epn-1	MS
WBGene00225742	0.221128816	-0.216347102	0.106	0.092	1	2	Bma-klp-12	MS
WBGene00234270	0.224253972	-0.173646878	0.139	0.122	1	2	Bm14009	MS
WBGene00226842	0.224713393	-0.180861113	0.159	0.14	1	2	Bma-snrp-200	MS
WBGene00223467	0.229875621	-0.092759782	0.789	0.733	1	2	Bm3206	MS
WBGene00222029	0.233234558	-0.219457029	0.129	0.113	1	2	Bma-egl-8	MS
WBGene00234152	0.235455566	-0.116329378	0.174	0.154	1	2	Bma-sel-9	MS
WBGene00223682	0.237782699	-0.079256697	0.299	0.262	1	2	Bma-eef-1G	MS
WBGene00226673	0.23953608	-0.114451061	0.407	0.353	1	2	Bma-crt-1	MS
WBGene00234098	0.242450594	-0.149480562	0.359	0.307	1	2	Bma-atp-1	MS
WBGene00222646	0.245174443	-0.15368584	0.119	0.105	1	2	Bm2385	MS
WBGene00224621	0.252865941	-0.097714366	0.112	0.099	1	2	Bma-dnj-13	MS
WBGene00221802	0.25361042	-0.043751585	0.632	0.566	1	2	Bma-cpna-2	MS
WBGene00223496	0.25760659	-0.153885662	0.676	0.6	1	2	Bma-mlc-3	MS
WBGene00224836	0.260906742	-0.114217397	0.116	0.103	1	2	Bma-golg-4	MS
WBGene00234154	0.26361029	-0.064465157	0.644	0.569	1	2	Bma-rpl-24.1	MS
WBGene00222551	0.264430811	-0.104368239	0.34	0.297	1	2	Bma-dim-1	MS
WBGene00225658	0.266829289	-0.118683625	0.1	0.088	1	2	Bma-sma-1	MS
WBGene00228442	0.26924178	-0.130499701	0.113	0.1	1	2	Bma-yap-1	MS
WBGene00232606	0.271039874	-0.157274645	0.214	0.189	1	2	Bma-tns-1	MS
WBGene00222065	0.271723523	-0.126156926	0.192	0.17	1	2	Bm1804	MS
WBGene00224101	0.274184564	-0.171249388	0.12	0.105	1	2	Bma-cdc-73	MS
WBGene00222286	0.27870571	-0.144542701	0.123	0.109	1	2	Bma-trxr-1	MS
WBGene00222432	0.290339613	-0.124222036	0.103	0.09	1	2	Bm2171	MS
WBGene00225807	0.291420092	-0.247872219	0.114	0.101	1	2	Bma-chd-7	MS
WBGene00230132	0.294147228	-0.197195049	0.174	0.155	1	2	Bm9871	MS
WBGene00225792	0.298208728	-0.124603072	0.326	0.291	1	2	Bma-sel-13	MS
WBGene00224701	0.298838274	-0.154470083	0.128	0.115	1	2	Bm4440	MS
WBGene00233965	0.301859579	-0.148946902	0.127	0.114	1	2	Bma-cct-4	MS
WBGene00223368	0.306547935	-0.183143566	0.113	0.1	1	2	Bma-hoe-1	MS
WBGene00268712	0.309538012	-0.157239021	0.112	0.099	1	2	Bm17569	MS
WBGene00225260	0.311483469	-0.164370934	0.476	0.405	1	2	Bma-unc-68	MS
WBGene00226885	0.312084427	-0.171011769	0.134	0.119	1	2	Bma-rnp-6	MS
WBGene00227848	0.322036087	-0.116848852	0.24	0.215	1	2	Bm7587	MS
WBGene00233949	0.327988001	-0.136162547	0.477	0.423	1	2	Bma-rack-1	MS
WBGene00227249	0.332620846	-0.160728955	0.25	0.221	1	2	Bm6988	MS
WBGene00227657	0.335023802	-0.181612935	0.176	0.156	1	2	Bma-deb-1	MS
WBGene00226255	0.343922962	-0.19730934	0.109	0.098	1	2	Bma-dnj-23	MS
WBGene00227556	0.357826013	-0.169320254	0.105	0.094	1	2	Bma-ssl-1	MS
WBGene00222701	0.367890311	-0.183234634	0.344	0.307	1	2	Bma-fust-1	MS
WBGene00226192	0.367944036	-0.187360549	0.217	0.191	1	2	Bma-pygl-1	MS
WBGene00223765	0.381479355	-0.18908015	0.112	0.101	1	2	Bma-zyg-9	MS
WBGene00234149	0.395398797	-0.131723958	0.712	0.667	1	2	Bma-rpl-15	MS
WBGene00228979	0.397018985	-0.152784273	0.2	0.179	1	2	Bm8718	MS
WBGene00222893	0.399794495	-0.100421298	0.696	0.65	1	2	Bm2632	MS
WBGene00229344	0.402292013	-0.161447962	0.172	0.154	1	2	Bm9083	MS
WBGene00223150	0.405046688	-0.214819719	0.203	0.181	1	2	Bm2889	MS
WBGene00223872	0.40666557	-0.094903131	0.704	0.637	1	2	Bma-hsp-1	MS
WBGene00223390	0.419129233	-0.175512571	0.266	0.236	1	2	Bm3129	MS
WBGene00227409	0.431722987	-0.195803865	0.102	0.092	1	2	Bm7148	MS
WBGene00268558	0.43503592	-0.182497762	0.16	0.144	1	2	Bm17415	MS
WBGene00224258	0.439363963	-0.175905036	0.136	0.122	1	2	Bma-vps-60	MS
WBGene00223104	0.441163286	-0.207363945	0.215	0.19	1	2	Bm2843	MS
WBGene00227164	0.465504359	-0.244910333	0.167	0.15	1	2	Bm6903	MS
WBGene00224289	0.466420178	-0.108394132	0.429	0.375	1	2	Bma-zyx-1	MS
WBGene00220387	0.46893125	0.001084913	0.995	0.993	1	2	Bm126	MS
WBGene00226253	0.47962101	-0.143051986	0.105	0.095	1	2	Bm5992	MS
WBGene00224706	0.481988482	-0.153641756	0.118	0.107	1	2	Bma-clu-1	MS
WBGene00233979	0.483076456	-0.118176501	0.493	0.44	1	2	Bm13718	MS
WBGene00227425	0.486705724	-0.1020668	0.469	0.413	1	2	Bm7164	MS
WBGene00233982	0.496688982	-0.110531417	0.655	0.591	1	2	Bma-rps-14	MS
WBGene00222827	0.506847272	-0.160197851	0.125	0.114	1	2	Bm2566	MS
WBGene00222581	0.512028336	-0.13528503	0.597	0.526	1	2	Bma-rps-3	MS
WBGene00225205	0.523684958	-0.218527193	0.308	0.27	1	2	Bm4944	MS
WBGene00225330	0.534668296	-0.207855166	0.198	0.177	1	2	Bma-aqp-7	MS
WBGene00230969	0.542804169	-0.31477802	0.129	0.128	1	2	Bma-ztf-18.2	MS
WBGene00227356	0.551051972	-0.080491188	0.731	0.654	1	2	Bma-sqd-1	MS
WBGene00225835	0.556223665	-0.166050833	0.212	0.191	1	2	Bma-dnj-19	MS
WBGene00227353	0.557998734	-0.178111329	0.115	0.105	1	2	Bm7092	MS
WBGene00222707	0.584181999	-0.144039179	0.439	0.384	1	2	Bm2446	MS
WBGene00225131	0.588845603	-0.326092056	0.165	0.15	1	2	Bma-sluh-7	MS
WBGene00227315	0.589254699	-0.185894759	0.375	0.33	1	2	Bma-tln-1	MS
WBGene00226075	0.594170835	-0.110105357	0.789	0.728	1	2	Bma-ekl-6	MS
WBGene00224078	0.596611138	-0.255291315	0.18	0.164	1	2	Bm3817	MS
WBGene00224304	0.604293944	-0.182421386	0.169	0.155	1	2	Bma-ess-2	MS
WBGene00234155	0.62739105	-0.19734998	0.171	0.156	1	2	Bma-rpl-24.2	MS
WBGene00223363	0.629414083	-0.204006772	0.186	0.171	1	2	Bma-madd-3	MS
WBGene00226788	0.631240909	-0.153540545	0.223	0.202	1	2	Bma-gbb-1	MS
WBGene00223780	0.637774919	-0.254125325	0.163	0.15	1	2	Bma-prpf-4	MS
WBGene00269368	0.639077754	-0.255824333	0.148	0.135	1	2	Bma-pas-1	MS
WBGene00223023	0.640739989	-0.167330391	0.303	0.275	1	2	Bma-ssb-1	MS
WBGene00229394	0.656983239	-0.202847423	0.132	0.121	1	2	Bm9133	MS
WBGene00226784	0.666426421	-0.184620709	0.134	0.125	1	2	Bm6523	MS
WBGene00226481	0.678996817	-0.225238912	0.188	0.172	1	2	Bma-ttn-1	MS
WBGene00234226	0.684703523	-0.202778911	0.422	0.379	1	2	Bma-enol-1	MS
WBGene00226908	0.690038806	-0.130143448	0.605	0.546	1	2	Bma-mrpl-20	MS
WBGene00234304	0.694787004	-0.113962869	0.742	0.684	1	2	Bma-rpl-13	MS
WBGene00226043	0.713439568	-0.17543122	0.243	0.222	1	2	Bma-ric-3	MS
WBGene00227282	0.716091467	-0.227787612	0.107	0.099	1	2	Bm7021	MS
WBGene00226480	0.72173736	-0.087069775	0.81	0.761	1	2	Bm6219	MS
WBGene00231732	0.735117873	-0.162802867	0.285	0.26	1	2	Bma-tep-1	MS
WBGene00223132	0.76370073	-0.195646941	0.367	0.324	1	2	Bm2871	MS
WBGene00224867	0.764052587	-0.209022109	0.101	0.095	1	2	Bma-syd-2	MS
WBGene00224611	0.778407213	-0.12618986	0.65	0.595	1	2	Bma-rpl-5	MS
WBGene00224965	0.783207525	-0.088080292	0.73	0.662	1	2	Bma-rpl-12	MS
WBGene00227763	0.792126757	-0.163387206	0.597	0.527	1	2	Bm7502	MS
WBGene00226468	0.797137901	-0.234697176	0.143	0.139	1	2	Bm6207	MS
WBGene00234040	0.797590504	-0.057226433	0.834	0.789	1	2	Bma-rpl-32	MS
WBGene00227889	0.81045949	-0.164264939	0.113	0.108	1	2	Bma-tcer-1	MS
WBGene00229027	0.815246049	-0.222225074	0.15	0.14	1	2	Bma-ttbk-7	MS
WBGene00221836	0.818848737	-0.216912743	0.135	0.126	1	2	Bm1575	MS
WBGene00231105	0.841790321	-0.271423951	0.105	0.102	1	2	Bm10844	MS
WBGene00222353	0.854730524	-0.148693064	0.632	0.554	1	2	Bm2092	MS
WBGene00226935	0.866989597	-0.063343015	0.679	0.623	1	2	Bma-rpl-17	MS
WBGene00223506	0.869461681	-0.177263284	0.337	0.307	1	2	Bm3245	MS
WBGene00221723	0.883177832	-0.083645458	0.759	0.692	1	2	Bma-har-1	MS
WBGene00222601	0.883215827	-0.210778818	0.102	0.097	1	2	Bm2340	MS
WBGene00226211	0.885185881	-0.255010064	0.321	0.293	1	2	Bm5950	MS
WBGene00233929	0.90961196	-0.159975197	0.402	0.37	1	2	Bma-pbs-5	MS
WBGene00225456	0.91740851	-0.088404609	0.793	0.74	1	2	Bm5195	MS
WBGene00224015	0.920418739	-0.210095168	0.465	0.413	1	2	Bma-cpz-1	MS
WBGene00225264	0.921297075	-0.225929556	0.276	0.254	1	2	Bma-sca-1	MS
WBGene00234298	0.923654433	-0.236841887	0.19	0.178	1	2	Bma-pno-1	MS
WBGene00225960	0.929170173	-0.1224889	0.669	0.596	1	2	Bm5699	MS
WBGene00234300	0.947162712	-0.10570382	0.635	0.584	1	2	Bma-rps-8	MS
WBGene00226794	0.948227057	-0.162811357	0.433	0.396	1	2	Bma-rps-4	MS
WBGene00225496	0.951870486	-0.20276335	0.378	0.341	1	2	Bma-zig-12	MS
WBGene00233943	0.954561617	-0.202762306	0.101	0.097	1	2	Bma-pdha-1.2	MS
WBGene00225831	0.979484778	-0.003811686	0.987	0.975	1	2	Bma-tre-2	MS
WBGene00224751	0.988236408	-0.151559142	0.605	0.555	1	2	Bma-rps-1	MS
WBGene00230037	1.22E-73	1.248124258	0.324	0.098	1.27E-69	3	Bm9776	Unannotated
WBGene00228775	1.87E-69	1.918495845	0.146	0.004	1.95E-65	3	Bm8514	Unannotated
WBGene00230922	1.03E-64	1.886936423	0.133	0.002	1.07E-60	3	Bm10661	Unannotated
WBGene00255710	1.26E-60	1.777708587	0.141	0.008	1.31E-56	3	Bm17068	Unannotated
WBGene00229641	4.50E-56	1.257374332	0.245	0.07	4.67E-52	3	Bma-srp-2	Unannotated
WBGene00268299	4.71E-47	0.340308896	0.998	0.984	4.89E-43	3	Bm17156	Unannotated
WBGene00220294	1.45E-18	0.25082235	0.963	0.966	1.51E-14	3	Bm33	Unannotated
WBGene00220284	7.12E-18	0.449243089	0.495	0.379	7.39E-14	3	Bm23	Unannotated
WBGene00233911	5.32E-15	0.690590224	0.133	0.064	5.52E-11	3	Bma-rpl-39	Unannotated
WBGene00226306	2.51E-13	0.528840547	0.31	0.212	2.60E-09	3	Bm6045	Unannotated
WBGene00227313	6.23E-13	0.603311474	0.1	0.044	6.47E-09	3	Bma-pghm-1	Unannotated
WBGene00222262	2.37E-12	-0.29177879	0.812	0.836	2.46E-08	3	Bm2001	Unannotated
WBGene00234335	3.60E-11	0.336088369	0.514	0.42	3.74E-07	3	Bm14074	Unannotated
WBGene00220302	7.65E-11	0.572683813	0.141	0.081	7.94E-07	3	Bm41	Unannotated
WBGene00268657	4.56E-10	0.458404322	0.285	0.207	4.74E-06	3	Bm17514	Unannotated
WBGene00220425	7.92E-10	0.377568435	0.373	0.29	8.22E-06	3	Bm164	Unannotated
WBGene00220619	2.88E-09	0.467519721	0.168	0.108	2.99E-05	3	Bm358	Unannotated
WBGene00225415	1.42E-08	0.196438334	0.77	0.692	0.000147628	3	Bma-nduo-4	Unannotated
WBGene00220387	3.29E-08	0.177467092	0.938	0.901	0.000341807	3	Bm126	Unannotated
WBGene00220288	4.12E-08	0.303948014	0.271	0.199	0.000427949	3	Bm27	Unannotated
WBGene00235061	4.72E-08	0.172517153	0.523	0.434	0.000490007	3	Bma-rpl-36	Unannotated
WBGene00234343	1.49E-07	0.378389029	0.239	0.177	0.001543313	3	Bma-rps-28	Unannotated
WBGene00234334	2.52E-07	0.20009361	0.609	0.529	0.002617579	3	Bma-rpl-36.A	Unannotated
WBGene00225894	4.75E-07	0.307453256	0.23	0.169	0.004934078	3	Bma-nog-1.2	Unannotated
WBGene00224156	2.23E-06	0.214743507	0.411	0.339	0.023140541	3	Bma-rps-21	Unannotated
WBGene00233912	2.27E-06	0.184202557	0.368	0.295	0.023559024	3	Bma-ubq-2	Unannotated
WBGene00226385	2.77E-06	0.286773844	0.116	0.075	0.028771451	3	Bm6124	Unannotated
WBGene00232900	4.69E-06	0.290146182	0.158	0.111	0.048702345	3	Bma-arid-1	Unannotated
WBGene00227522	7.16E-06	0.126753976	0.419	0.345	0.074401509	3	Bma-pab-1.1	Unannotated
WBGene00228581	7.73E-06	0.302344695	0.189	0.141	0.08026444	3	Bm8320	Unannotated
WBGene00226308	7.77E-06	0.220837925	0.351	0.286	0.080735886	3	Bm6047	Unannotated
WBGene00227781	1.38E-05	0.367238247	0.125	0.086	0.143685974	3	Bma-tomm-7	Unannotated
WBGene00222105	1.39E-05	0.2585633	0.218	0.168	0.144134039	3	Bma-rpl-29	Unannotated
WBGene00227337	1.52E-05	0.146996817	0.289	0.229	0.158188519	3	Bma-swsn-3	Unannotated
WBGene00234268	1.82E-05	0.120877613	0.581	0.503	0.189148726	3	Bm14007	Unannotated
WBGene00233981	2.13E-05	0.190334783	0.366	0.304	0.220799602	3	Bma-rpl-43	Unannotated
WBGene00224479	2.14E-05	0.136130908	0.409	0.343	0.221725979	3	Bm4218	Unannotated
WBGene00223989	4.42E-05	0.20755537	0.157	0.114	0.458718745	3	Bm3728	Unannotated
WBGene00225831	5.37E-05	0.115744698	0.919	0.867	0.557355292	3	Bma-tre-2	Unannotated
WBGene00220685	5.78E-05	0.274441953	0.124	0.087	0.600163959	3	Bm424	Unannotated
WBGene00234345	7.19E-05	0.174715973	0.381	0.325	0.746576001	3	Bma-rps-29	Unannotated
WBGene00224042	9.42E-05	0.155597765	0.23	0.182	0.978464213	3	Bma-cey-1	Unannotated
WBGene00225572	9.82E-05	-0.098827538	0.976	0.962	1	3	Bm5311	Unannotated
WBGene00220954	0.00012543	0.315352007	0.102	0.07	1	3	Bm693	Unannotated
WBGene00225126	0.000165503	0.077074004	0.476	0.405	1	3	Bma-tos-1	Unannotated
WBGene00229138	0.000198084	0.167143018	0.231	0.185	1	3	Bm8877	Unannotated
WBGene00226764	0.000206847	0.263993146	0.137	0.101	1	3	Bma-lbp-9	Unannotated
WBGene00223828	0.000224794	0.068688387	0.117	0.083	1	3	Bma-nono-1	Unannotated
WBGene00226696	0.000260459	0.24283204	0.137	0.101	1	3	Bma-trap-3	Unannotated
WBGene00224811	0.000261443	0.187575884	0.187	0.146	1	3	Bma-hrpr-1	Unannotated
WBGene00225274	0.000323581	0.271521573	0.112	0.081	1	3	Bm5013	Unannotated
WBGene00228283	0.000350626	0.060899605	0.289	0.236	1	3	Bm8022	Unannotated
WBGene00222318	0.000401997	0.294020927	0.18	0.141	1	3	Bm2057	Unannotated
WBGene00226400	0.000424642	0.267783533	0.152	0.117	1	3	Bm6139	Unannotated
WBGene00223658	0.000446297	0.069366277	0.266	0.217	1	3	Bm3397	Unannotated
WBGene00234329	0.000447313	0.123194045	0.279	0.23	1	3	Bm14068	Unannotated
WBGene00224112	0.000468047	0.06797841	0.123	0.089	1	3	Bma-vha-5	Unannotated
WBGene00224386	0.000480984	0.131741458	0.344	0.296	1	3	Bm4125	Unannotated
WBGene00228412	0.00049166	0.104499487	0.245	0.199	1	3	Bm8151	Unannotated
WBGene00222969	0.000513317	0.105188498	0.484	0.426	1	3	Bma-rpl-34	Unannotated
WBGene00234297	0.000548991	0.116065467	0.359	0.309	1	3	Bm14036	Unannotated
WBGene00228185	0.000552797	0.122911362	0.259	0.211	1	3	Bm7924	Unannotated
WBGene00225169	0.000591065	0.104777104	0.316	0.266	1	3	Bma-gut-2	Unannotated
WBGene00233242	0.000662024	0.153092955	0.367	0.311	1	3	Bma-rpl-22.2	Unannotated
WBGene00226655	0.000778509	0.270281662	0.132	0.1	1	3	Bma-rpb-10	Unannotated
WBGene00234001	0.000821087	0.215067329	0.119	0.088	1	3	Bma-fkb-2	Unannotated
WBGene00222026	0.000835132	0.094974988	0.738	0.678	1	3	Bma-rpl-23	Unannotated
WBGene00230620	0.000891675	0.141439151	0.474	0.424	1	3	Bma-rsp-5	Unannotated
WBGene00224107	0.000915606	0.171891567	0.107	0.078	1	3	Bma-wdr-48	Unannotated
WBGene00234286	0.001370544	0.192110446	0.159	0.125	1	3	Bma-eif-6	Unannotated
WBGene00224796	0.001438187	0.080831889	0.193	0.154	1	3	Bma-egl-15	Unannotated
WBGene00234316	0.001589247	0.143608154	0.269	0.227	1	3	Bm14055	Unannotated
WBGene00226501	0.00159321	-0.322898796	0.484	0.494	1	3	Bma-mlt-8	Unannotated
WBGene00232265	0.002052695	0.110358946	0.113	0.085	1	3	Bma-daf-1	Unannotated
WBGene00222710	0.002220824	0.213229086	0.116	0.088	1	3	Bm2449	Unannotated
WBGene00225341	0.002281055	0.213263661	0.133	0.104	1	3	Bma-hat-1	Unannotated
WBGene00224836	0.002430743	0.168260154	0.129	0.1	1	3	Bma-golg-4	Unannotated
WBGene00229133	0.002453587	0.109233676	0.132	0.102	1	3	Bm8872	Unannotated
WBGene00234258	0.002462332	0.191500929	0.123	0.095	1	3	Bma-rpn-9	Unannotated
WBGene00226759	0.002546483	0.220183125	0.11	0.084	1	3	Bm6498	Unannotated
WBGene00221959	0.002550169	0.157367089	0.131	0.102	1	3	Bm1698	Unannotated
WBGene00234211	0.002582396	0.217734811	0.124	0.096	1	3	Bma-sars-2	Unannotated
WBGene00226588	0.002637957	0.013975574	0.356	0.303	1	3	Bma-hsp-60	Unannotated
WBGene00225610	0.00264686	0.041233062	0.547	0.487	1	3	Bma-rpl-28	Unannotated
WBGene00221961	0.00271803	-0.233266558	0.588	0.581	1	3	Bma-rpl-4	Unannotated
WBGene00234166	0.002729628	0.066635362	0.703	0.637	1	3	Bma-rla-1	Unannotated
WBGene00226468	0.002886185	0.096375211	0.177	0.143	1	3	Bm6207	Unannotated
WBGene00225969	0.002980917	0.078716718	0.149	0.118	1	3	Bma-ztf-4	Unannotated
WBGene00220757	0.00299247	0.138997593	0.124	0.096	1	3	Bm496	Unannotated
WBGene00233954	0.003091088	0.161188706	0.107	0.081	1	3	Bm13693	Unannotated
WBGene00225373	0.003358209	0.088695698	0.162	0.13	1	3	Bm5112	Unannotated
WBGene00268538	0.003389231	0.052060663	0.202	0.166	1	3	Bma-rsp-3.2	Unannotated
WBGene00234173	0.003478927	0.126683611	0.21	0.174	1	3	Bma-snr-7	Unannotated
WBGene00223805	0.003594116	0.139764965	0.16	0.128	1	3	Bma-rpt-4	Unannotated
WBGene00233578	0.003750645	0.109554158	0.139	0.109	1	3	Bma-ipgm-1	Unannotated
WBGene00230944	0.003883357	0.192548617	0.127	0.1	1	3	Bm10683	Unannotated
WBGene00223756	0.00396322	0.129827603	0.119	0.092	1	3	Bm3495	Unannotated
WBGene00231031	0.003997954	0.108888467	0.266	0.227	1	3	Bm10770	Unannotated
WBGene00234163	0.004086833	0.13689671	0.441	0.395	1	3	Bma-rps-22	Unannotated
WBGene00234324	0.004225409	0.149597457	0.192	0.159	1	3	Bma-dlc-1	Unannotated
WBGene00226325	0.004233057	0.070402323	0.175	0.142	1	3	Bm6064	Unannotated
WBGene00220802	0.004271103	0.091231219	0.182	0.149	1	3	Bm541	Unannotated
WBGene00231107	0.004277471	0.222732092	0.133	0.105	1	3	Bm10846	Unannotated
WBGene00230129	0.004314209	0.184426229	0.137	0.11	1	3	Bma-timm-23.4	Unannotated
WBGene00222119	0.004420902	0.178889582	0.143	0.114	1	3	Bm1858	Unannotated
WBGene00224920	0.004498151	0.108115239	0.188	0.155	1	3	Bm4659	Unannotated
WBGene00225489	0.004664911	0.083173939	0.1	0.076	1	3	Bma-sgt-1	Unannotated
WBGene00223985	0.004725165	0.054788635	0.42	0.372	1	3	Bma-fkb-6	Unannotated
WBGene00228105	0.004739259	0.12183186	0.166	0.135	1	3	Bm7844	Unannotated
WBGene00223934	0.004744593	0.104854564	0.312	0.272	1	3	Bma-rps-23.2	Unannotated
WBGene00222311	0.004779235	0.163391404	0.137	0.109	1	3	Bma-pct-1	Unannotated
WBGene00234304	0.005140371	-0.185920217	0.661	0.644	1	3	Bma-rpl-13	Unannotated
WBGene00231066	0.005279417	0.140617409	0.135	0.107	1	3	Bm10805	Unannotated
WBGene00229465	0.005361252	0.095884737	0.27	0.232	1	3	Bm9204	Unannotated
WBGene00234319	0.005410794	0.058304548	0.262	0.224	1	3	Bma-rpb-6	Unannotated
WBGene00228620	0.00557832	0.079877166	0.171	0.141	1	3	Bm8359	Unannotated
WBGene00233137	0.00568731	0.137656251	0.153	0.125	1	3	Bma-glrx-10	Unannotated
WBGene00228622	0.005694873	0.132781973	0.143	0.114	1	3	Bma-cfim-2	Unannotated
WBGene00231409	0.005910324	0.139298851	0.131	0.104	1	3	Bma-cdkr-3	Unannotated
WBGene00226904	0.006082126	0.087545939	0.197	0.163	1	3	Bm6643	Unannotated
WBGene00227298	0.006163544	0.027506971	0.221	0.185	1	3	Bm7037	Unannotated
WBGene00234342	0.006326302	0.120308713	0.273	0.235	1	3	Bma-rpl-38	Unannotated
WBGene00223049	0.006338349	0.024390315	0.12	0.093	1	3	Bma-hcf-1	Unannotated
WBGene00224552	0.006413827	-0.001977877	0.135	0.106	1	3	Bm4291	Unannotated
WBGene00223116	0.007014302	0.131405932	0.208	0.175	1	3	Bma-rsp-8	Unannotated
WBGene00224132	0.007052152	0.01952894	0.185	0.151	1	3	Bma-rbpl-1	Unannotated
WBGene00227095	0.007284291	0.128532172	0.111	0.086	1	3	Bm6834	Unannotated
WBGene00227425	0.007472511	0.040330341	0.271	0.234	1	3	Bm7164	Unannotated
WBGene00234220	0.007586858	0.198817502	0.107	0.084	1	3	Bm13959	Unannotated
WBGene00224105	0.007587828	-0.344096855	0.299	0.323	1	3	Bma-ttr-38.1	Unannotated
WBGene00222701	0.00773146	0.050840075	0.337	0.296	1	3	Bma-fust-1	Unannotated
WBGene00234326	0.007913909	0.046178216	0.389	0.34	1	3	Bma-rpl-35	Unannotated
WBGene00222153	0.007982172	0.100891751	0.274	0.238	1	3	Bma-ahsa-1	Unannotated
WBGene00227058	0.008923204	0.1384655	0.124	0.1	1	3	Bma-rom-5	Unannotated
WBGene00234044	0.009223187	0.075272717	0.459	0.417	1	3	Bma-rps-15	Unannotated
WBGene00234112	0.009859412	0.122077236	0.1	0.078	1	3	Bma-rpn-6.1	Unannotated
WBGene00229500	0.009935174	-0.177464709	0.667	0.651	1	3	Bma-rpl-7A.3	Unannotated
WBGene00230204	0.01012336	0.135418922	0.118	0.095	1	3	Bm9943	Unannotated
WBGene00269366	0.010253203	0.11080611	0.107	0.084	1	3	Bma-spl-3	Unannotated
WBGene00225570	0.010287749	0.085705706	0.167	0.138	1	3	Bma-ivns-1	Unannotated
WBGene00222581	0.010459226	-0.204953456	0.533	0.536	1	3	Bma-rps-3	Unannotated
WBGene00230930	0.011312574	0.027207597	0.167	0.137	1	3	Bm10669	Unannotated
WBGene00226941	0.0121394	0.056749428	0.119	0.095	1	3	Bma-gcn-1	Unannotated
WBGene00228653	0.012239077	0.11609498	0.114	0.09	1	3	Bm8392	Unannotated
WBGene00229509	0.012324362	0.034781538	0.127	0.102	1	3	Bm9248	Unannotated
WBGene00226872	0.012501394	0.060744569	0.201	0.168	1	3	Bm6611	Unannotated
WBGene00222474	0.012552038	0.032633553	0.236	0.202	1	3	Bma-popl-4	Unannotated
WBGene00230633	0.012653468	0.01997866	0.311	0.27	1	3	Bm10372	Unannotated
WBGene00227138	0.012998409	0.120400459	0.2	0.171	1	3	Bm6877	Unannotated
WBGene00221312	0.01303089	0.022249618	0.29	0.252	1	3	Bm1051	Unannotated
WBGene00227836	0.013084186	0.068739952	0.216	0.185	1	3	Bma-dpy-30	Unannotated
WBGene00223294	0.013127289	0.250034133	0.123	0.1	1	3	Bma-eif-3.F	Unannotated
WBGene00222835	0.013171194	0.054381609	0.164	0.136	1	3	Bma-hecd-1	Unannotated
WBGene00234156	0.013358327	-0.117379132	0.911	0.882	1	3	Bma-tct-1	Unannotated
WBGene00224731	0.013579313	0.116805204	0.193	0.165	1	3	Bma-mrps-16	Unannotated
WBGene00231220	0.013620134	0.083094195	0.103	0.081	1	3	Bm10959	Unannotated
WBGene00235014	0.013636359	0.018000765	0.362	0.324	1	3	Bm14679	Unannotated
WBGene00226632	0.013761054	-0.025431239	0.198	0.166	1	3	Bma-ccar-1	Unannotated
WBGene00226760	0.014192821	0.139405749	0.106	0.084	1	3	Bma-sptf-3	Unannotated
WBGene00234143	0.014463608	-0.241091583	0.493	0.499	1	3	Bma-rps-6	Unannotated
WBGene00225280	0.014565502	0.067525773	0.169	0.142	1	3	Bm5019	Unannotated
WBGene00226602	0.015601851	0.221404813	0.127	0.105	1	3	Bma-rpl-7A.1	Unannotated
WBGene00224797	0.015768654	0.042809795	0.258	0.224	1	3	Bm4536	Unannotated
WBGene00226961	0.015816855	-0.00600839	0.109	0.087	1	3	Bm6700	Unannotated
WBGene00226749	0.015951983	0.068966173	0.135	0.11	1	3	Bma-mtk-1	Unannotated
WBGene00234121	0.016191733	0.127671626	0.135	0.111	1	3	Bm13860	Unannotated
WBGene00226858	0.016193906	0.026917821	0.126	0.102	1	3	Bma-rsks-1	Unannotated
WBGene00234177	0.016388239	0.075573492	0.24	0.209	1	3	Bma-prp-8	Unannotated
WBGene00227230	0.016635185	0.039848528	0.101	0.08	1	3	Bma-cus-2	Unannotated
WBGene00223366	0.016839245	0.100679099	0.116	0.094	1	3	Bm3105	Unannotated
WBGene00234137	0.017388473	-0.397762931	0.104	0.125	1	3	Bma-pyp-1	Unannotated
WBGene00226484	0.017544189	0.067232138	0.129	0.105	1	3	Bma-gei-4	Unannotated
WBGene00233946	0.017665351	0.022164222	0.164	0.136	1	3	Bma-lin-53	Unannotated
WBGene00223071	0.017673993	-0.040588366	0.111	0.088	1	3	Bma-trr-1	Unannotated
WBGene00222058	0.017736654	-0.250299784	0.554	0.543	1	3	Bma-daf-7	Unannotated
WBGene00227396	0.017739381	0.041498441	0.154	0.127	1	3	Bm7135	Unannotated
WBGene00231406	0.017844095	0.101168988	0.186	0.159	1	3	Bma-ttx-7	Unannotated
WBGene00234332	0.017855813	0.068269033	0.274	0.238	1	3	Bma-snr-4	Unannotated
WBGene00222234	0.017984809	0.001624963	0.132	0.108	1	3	Bma-ife-4	Unannotated
WBGene00233965	0.018282249	0.118731731	0.161	0.135	1	3	Bma-cct-4	Unannotated
WBGene00223114	0.018815396	-0.194283547	0.641	0.62	1	3	Bma-rps-2.1	Unannotated
WBGene00222356	0.019903251	-0.181617079	0.594	0.588	1	3	Bma-rpl-19	Unannotated
WBGene00226443	0.020621143	0.140381979	0.115	0.093	1	3	Bma-rbm-25	Unannotated
WBGene00223058	0.020696945	0.11473645	0.165	0.139	1	3	Bm2797	Unannotated
WBGene00231090	0.021093985	0.074552232	0.101	0.081	1	3	Bma-cul-2	Unannotated
WBGene00227549	0.021359879	-0.041255145	0.21	0.179	1	3	Bm7288	Unannotated
WBGene00233923	0.02238882	0.011020936	0.291	0.255	1	3	Bma-hsp-6	Unannotated
WBGene00224611	0.022959762	-0.213838223	0.603	0.593	1	3	Bma-rpl-5	Unannotated
WBGene00226855	0.022972174	0.049814587	0.11	0.089	1	3	Bma-tra-1	Unannotated
WBGene00229332	0.022985855	0.129740702	0.127	0.105	1	3	Bm9071	Unannotated
WBGene00225258	0.023033342	-0.002838423	0.15	0.126	1	3	Bma-unc-70	Unannotated
WBGene00225623	0.023082152	0.016002513	0.395	0.351	1	3	Bma-mdt-15	Unannotated
WBGene00222582	0.023302065	0.070486412	0.187	0.16	1	3	Bma-rpn-2	Unannotated
WBGene00223669	0.023345273	-0.070624998	0.102	0.081	1	3	Bma-ctnb-1	Unannotated
WBGene00226504	0.023473356	0.087015537	0.191	0.164	1	3	Bma-pod-2	Unannotated
WBGene00229391	0.023518785	-0.0223413	0.218	0.187	1	3	Bma-ccch-1	Unannotated
WBGene00234149	0.023742714	-0.174910532	0.647	0.635	1	3	Bma-rpl-15	Unannotated
WBGene00223531	0.023778285	0.069724013	0.402	0.365	1	3	Bma-rpl-33.1	Unannotated
WBGene00225374	0.024018679	0.098373111	0.102	0.083	1	3	Bm5113	Unannotated
WBGene00269140	0.024697141	0.093522633	0.628	0.589	1	3	Bm17998	Unannotated
WBGene00227370	0.024868135	0.17861715	0.119	0.098	1	3	Bm7109	Unannotated
WBGene00234018	0.025245129	0.001309824	0.293	0.256	1	3	Bma-rpt-1	Unannotated
WBGene00223305	0.025416208	0.04167373	0.168	0.143	1	3	Bm3044	Unannotated
WBGene00224520	0.027272764	0.001230978	0.289	0.256	1	3	Bma-ftt-2.2	Unannotated
WBGene00223342	0.027796458	0.038002459	0.215	0.187	1	3	Bm3081	Unannotated
WBGene00233135	0.028082244	0.117541262	0.116	0.095	1	3	Bm12874	Unannotated
WBGene00225272	0.028835666	0.123497676	0.168	0.143	1	3	Bma-mrpl-36	Unannotated
WBGene00223872	0.029486421	-0.098480258	0.567	0.513	1	3	Bma-hsp-1	Unannotated
WBGene00227265	0.029661968	0.081927246	0.206	0.179	1	3	Bma-eel-1	Unannotated
WBGene00224923	0.030220049	0.036552095	0.109	0.089	1	3	Bma-madf-3	Unannotated
WBGene00223023	0.03052645	0.04182286	0.331	0.297	1	3	Bma-ssb-1	Unannotated
WBGene00226496	0.032430289	0.009978649	0.283	0.247	1	3	Bma-snr-2	Unannotated
WBGene00226838	0.033749332	0.127423053	0.1	0.082	1	3	Bm6577	Unannotated
WBGene00230839	0.033931598	0.081189694	0.162	0.14	1	3	Bm10578	Unannotated
WBGene00225960	0.034194548	0.0321153	0.36	0.323	1	3	Bm5699	Unannotated
WBGene00222548	0.034416902	0.039227609	0.103	0.084	1	3	Bm2287	Unannotated
WBGene00225052	0.034907916	0.051999303	0.152	0.13	1	3	Bma-mog-1	Unannotated
WBGene00234295	0.035799135	-0.007763445	0.102	0.083	1	3	Bm14034	Unannotated
WBGene00233489	0.035801964	0.003186217	0.102	0.083	1	3	Bm13228	Unannotated
WBGene00227883	0.036417721	0.094063803	0.135	0.115	1	3	Bma-mrps-23	Unannotated
WBGene00222121	0.03652089	0.016636335	0.258	0.23	1	3	Bma-tads-1	Unannotated
WBGene00223293	0.037119916	-0.005752386	0.195	0.168	1	3	Bma-eat-3	Unannotated
WBGene00225168	0.037191239	0.026649162	0.174	0.15	1	3	Bm4907	Unannotated
WBGene00234322	0.037380957	0.016416057	0.28	0.247	1	3	Bma-rpl-27	Unannotated
WBGene00224490	0.037730659	0.117922655	0.104	0.085	1	3	Bma-pam-1	Unannotated
WBGene00225680	0.037944876	0.012174046	0.163	0.139	1	3	Bma-pcf-11	Unannotated
WBGene00231173	0.038499047	0.068909567	0.24	0.214	1	3	Bm10912	Unannotated
WBGene00224889	0.038521423	0.020975668	0.486	0.445	1	3	Bm4628	Unannotated
WBGene00222310	0.03858867	-0.047556877	0.237	0.206	1	3	Bm2049	Unannotated
WBGene00224998	0.038592645	0.035137431	0.419	0.384	1	3	Bma-dph-3	Unannotated
WBGene00234135	0.038845905	0.054478514	0.262	0.232	1	3	Bma-fib-1	Unannotated
WBGene00224044	0.038964083	0.039067234	0.128	0.108	1	3	Bma-sdhd-1	Unannotated
WBGene00233216	0.039187739	-0.027206553	0.115	0.094	1	3	Bma-mdf-1	Unannotated
WBGene00234232	0.03959769	0.02243406	0.108	0.089	1	3	Bma-fce-1	Unannotated
WBGene00225684	0.039639245	-0.337949831	0.122	0.14	1	3	Bma-larp-1	Unannotated
WBGene00223246	0.039725413	-0.002875038	0.133	0.112	1	3	Bma-rpn-13	Unannotated
WBGene00229828	0.040068029	0.113391852	0.121	0.101	1	3	Bm9567	Unannotated
WBGene00228676	0.040429473	0.04568087	0.127	0.107	1	3	Bm8415	Unannotated
WBGene00228757	0.041930685	0.015725926	0.327	0.293	1	3	Bm8496	Unannotated
WBGene00221291	0.042289798	0.075527339	0.173	0.15	1	3	Bm1030	Unannotated
WBGene00224486	0.042685688	0.057369523	0.108	0.089	1	3	Bm4225	Unannotated
WBGene00223506	0.042817722	0.004661903	0.287	0.255	1	3	Bm3245	Unannotated
WBGene00227131	0.042865004	-0.02345992	0.469	0.427	1	3	Bma-mif-1	Unannotated
WBGene00233106	0.042879867	0.066026134	0.135	0.115	1	3	Bm12845	Unannotated
WBGene00222065	0.043678206	0.164653496	0.141	0.121	1	3	Bm1804	Unannotated
WBGene00223319	0.043782571	0.076070529	0.148	0.127	1	3	Bma-rsp-7	Unannotated
WBGene00226842	0.043787611	0.02546981	0.142	0.12	1	3	Bma-snrp-200	Unannotated
WBGene00234936	0.044083533	0.023406935	0.125	0.106	1	3	Bma-nrfl-1	Unannotated
WBGene00255501	0.044245105	0.019881321	0.118	0.099	1	3	Bma-unc-116	Unannotated
WBGene00226876	0.045144563	0.088944001	0.111	0.092	1	3	Bma-scpl-3	Unannotated
WBGene00222590	0.045738121	0.131903526	0.166	0.146	1	3	Bma-cab-1	Unannotated
WBGene00223165	0.046313159	-0.024277468	0.226	0.198	1	3	Bma-ril-1	Unannotated
WBGene00225080	0.046485802	0.044996286	0.106	0.088	1	3	Bma-sel-7	Unannotated
WBGene00227072	0.046528937	0.052052209	0.191	0.167	1	3	Bm6811	Unannotated
WBGene00224614	0.047507538	0.134132451	0.104	0.087	1	3	Bm4353	Unannotated
WBGene00233154	0.047592667	0.069972431	0.106	0.088	1	3	Bm12893	Unannotated
WBGene00225530	0.048903366	0.039252571	0.112	0.094	1	3	Bma-gana-1	Unannotated
WBGene00233929	0.049645252	0.006889545	0.393	0.354	1	3	Bma-pbs-5	Unannotated
WBGene00226491	0.050268778	-0.170369218	0.651	0.648	1	3	Bma-lap-2	Unannotated
WBGene00228538	0.050405975	0.062039629	0.141	0.121	1	3	Bm8277	Unannotated
WBGene00225029	0.050489646	0.100035185	0.124	0.106	1	3	Bma-rnp-5	Unannotated
WBGene00226583	0.05111844	-0.019825895	0.102	0.084	1	3	Bm6322	Unannotated
WBGene00223530	0.051616904	0.054265392	0.1	0.083	1	3	Bm3269	Unannotated
WBGene00228586	0.051910989	0.06511848	0.127	0.108	1	3	Bm8325	Unannotated
WBGene00224784	0.052010104	-0.031017737	0.134	0.113	1	3	Bm4523	Unannotated
WBGene00224919	0.052110217	0.068283521	0.119	0.1	1	3	Bma-erfa-3	Unannotated
WBGene00223960	0.052432091	0.068617991	0.123	0.104	1	3	Bma-gsp-1	Unannotated
WBGene00234280	0.052809398	0.033649418	0.154	0.133	1	3	Bm14019	Unannotated
WBGene00220669	0.053353805	0.049741762	0.807	0.757	1	3	Bma-rpl-33.2	Unannotated
WBGene00224373	0.053912233	0.008572541	0.93	0.869	1	3	Bm4112	Unannotated
WBGene00221977	0.054968987	-0.061381368	0.145	0.123	1	3	Bm1716	Unannotated
WBGene00225593	0.055468394	-0.302998955	0.12	0.138	1	3	Bma-vha-1	Unannotated
WBGene00234226	0.055925236	0.116913708	0.141	0.122	1	3	Bma-enol-1	Unannotated
WBGene00225737	0.056182198	-0.293089494	0.085	0.101	1	3	Bm5476	Unannotated
WBGene00223370	0.056323211	-0.029075923	0.133	0.112	1	3	Bm3109	Unannotated
WBGene00224743	0.056400132	0.070106578	0.231	0.207	1	3	Bma-vig-1	Unannotated
WBGene00225576	0.056955418	0.009226088	0.143	0.123	1	3	Bma-ebax-1	Unannotated
WBGene00223797	0.057105297	0.078143657	0.102	0.085	1	3	Bma-dlat-1	Unannotated
WBGene00224153	0.058026192	0.068668647	0.155	0.135	1	3	Bma-yju-2	Unannotated
WBGene00230014	0.058155315	-0.016671859	0.137	0.117	1	3	Bm9753	Unannotated
WBGene00227995	0.058718099	0.020501455	0.108	0.09	1	3	Bm7734	Unannotated
WBGene00230319	0.05872138	-0.041018395	0.173	0.15	1	3	Bma-pqn-35	Unannotated
WBGene00222148	0.05898473	-0.029897377	0.108	0.09	1	3	Bma-mtrr-1	Unannotated
WBGene00224622	0.059032791	0.027910792	0.15	0.129	1	3	Bma-gtf-2E2	Unannotated
WBGene00227410	0.059064021	0.043068758	0.15	0.13	1	3	Bma-xpc-1.1	Unannotated
WBGene00222088	0.059609812	0.100254305	0.271	0.247	1	3	Bma-moa-2	Unannotated
WBGene00222714	0.060399307	0.031801682	0.291	0.263	1	3	Bma-bcl-7	Unannotated
WBGene00227059	0.060687427	0.075769389	0.146	0.126	1	3	Bma-nduf-5	Unannotated
WBGene00234192	0.061522892	-0.05291139	0.142	0.121	1	3	Bma-moc-3	Unannotated
WBGene00231250	0.062175996	0.006275246	0.126	0.107	1	3	Bm10989	Unannotated
WBGene00232899	0.062619456	0.04972689	0.112	0.095	1	3	Bma-cars-1.2	Unannotated
WBGene00222020	0.062972476	0.012076781	0.135	0.116	1	3	Bma-rbm-26	Unannotated
WBGene00223789	0.063060443	-0.02619163	0.252	0.223	1	3	NA	Unannotated
WBGene00223902	0.063061213	-0.060250159	0.132	0.112	1	3	Bma-nurf-1	Unannotated
WBGene00224831	0.063126047	0.003441821	0.157	0.135	1	3	Bm4570	Unannotated
WBGene00222649	0.063583568	0.055877586	0.151	0.131	1	3	Bma-dnc-4	Unannotated
WBGene00224751	0.063660675	-0.137446806	0.579	0.578	1	3	Bma-rps-1	Unannotated
WBGene00230739	0.063844571	0.045919198	0.109	0.092	1	3	Bm10478	Unannotated
WBGene00234060	0.06391662	0.087559139	0.166	0.146	1	3	Bma-rfc-2	Unannotated
WBGene00226014	0.064596169	0.000358661	0.224	0.197	1	3	Bma-lin-59	Unannotated
WBGene00229394	0.066196232	-0.035672987	0.113	0.095	1	3	Bm9133	Unannotated
WBGene00234202	0.069086156	-0.24155034	0.455	0.457	1	3	Bma-rpl-2	Unannotated
WBGene00227222	0.069349726	-0.006282331	0.177	0.155	1	3	Bma-dnj-29	Unannotated
WBGene00225849	0.06959584	0.049634641	0.107	0.091	1	3	Bma-hsr-9	Unannotated
WBGene00231384	0.069900956	-0.039580157	0.101	0.084	1	3	Bma-taf-1	Unannotated
WBGene00231120	0.070896086	-0.316040421	0.103	0.118	1	3	Bm10859	Unannotated
WBGene00234089	0.071133439	0.027985115	0.111	0.094	1	3	Bma-vps-45	Unannotated
WBGene00234159	0.072564714	-0.008963471	0.63	0.578	1	3	Bm13898	Unannotated
WBGene00226162	0.072643058	-0.010967085	0.191	0.168	1	3	Bma-cmd-1	Unannotated
WBGene00227208	0.072707308	0.149516412	0.129	0.112	1	3	Bm6947	Unannotated
WBGene00234162	0.073399468	0.017897563	0.476	0.437	1	3	Bma-rps-16	Unannotated
WBGene00234300	0.073632529	-0.178264465	0.589	0.573	1	3	Bma-rps-8	Unannotated
WBGene00226367	0.073683634	-0.047440972	0.144	0.124	1	3	Bma-pqn-73	Unannotated
WBGene00223433	0.073784802	0.097509492	0.163	0.145	1	3	Bm3172	Unannotated
WBGene00225658	0.075567449	0.113560368	0.143	0.125	1	3	Bma-sma-1	Unannotated
WBGene00222284	0.075717565	0.110176402	0.1	0.085	1	3	Bma-adah-1	Unannotated
WBGene00225817	0.076175361	0.044698603	0.12	0.103	1	3	Bm5556	Unannotated
WBGene00225121	0.076970521	-0.053111694	0.101	0.084	1	3	Bm4860	Unannotated
WBGene00223079	0.077071939	0.043558717	0.134	0.116	1	3	Bma-uba-1	Unannotated
WBGene00223339	0.077321576	0.001367722	0.11	0.094	1	3	Bm3078	Unannotated
WBGene00224653	0.078217008	0.021742533	0.104	0.088	1	3	Bma-stau-1	Unannotated
WBGene00228979	0.078354747	-0.035465995	0.161	0.141	1	3	Bm8718	Unannotated
WBGene00226940	0.079039114	0.042556354	0.108	0.092	1	3	Bma-grh-1	Unannotated
WBGene00227432	0.080806729	0.014382022	0.114	0.097	1	3	Bma-glp-4	Unannotated
WBGene00223393	0.081490488	-0.052429361	0.154	0.134	1	3	Bma-ddx-23	Unannotated
WBGene00223584	0.082489885	0.026629561	0.118	0.101	1	3	Bma-srgp-1	Unannotated
WBGene00230033	0.082584328	0.1408307	0.101	0.086	1	3	Bma-casc-3.1	Unannotated
WBGene00225691	0.0828453	-0.186627024	0.585	0.563	1	3	Bma-rpl-6	Unannotated
WBGene00225895	0.082914443	0.000614837	0.53	0.485	1	3	Bma-rps-24	Unannotated
WBGene00226452	0.08556724	-0.369454479	0.104	0.118	1	3	Bm6191	Unannotated
WBGene00232772	0.085954391	-0.062201866	0.483	0.432	1	3	Bm12511	Unannotated
WBGene00225350	0.086950269	0.020135209	0.143	0.126	1	3	Bma-calu-1	Unannotated
WBGene00230176	0.088176098	-0.19973394	0.429	0.436	1	3	Bm9915	Unannotated
WBGene00226372	0.088793395	-0.212218335	0.38	0.389	1	3	Bm6111	Unannotated
WBGene00224756	0.08949529	-0.079322394	0.171	0.15	1	3	Bma-wbp-4	Unannotated
WBGene00223711	0.090239397	0.0342411	0.114	0.099	1	3	Bma-sart-1	Unannotated
WBGene00229899	0.091108151	0.044915806	0.105	0.089	1	3	Bm9638	Unannotated
WBGene00223778	0.091720785	-0.009325752	0.345	0.317	1	3	Bma-nars-1.4	Unannotated
WBGene00220503	0.091973772	0.061030871	0.134	0.117	1	3	Bm242	Unannotated
WBGene00226728	0.093313004	-0.043709446	0.134	0.116	1	3	Bm6467	Unannotated
WBGene00225845	0.095615482	-0.068780154	0.242	0.215	1	3	Bma-enpl-1	Unannotated
WBGene00223138	0.096627526	0.031522784	0.131	0.114	1	3	Bm2877	Unannotated
WBGene00226027	0.098128616	0.116155778	0.131	0.115	1	3	Bm5766	Unannotated
WBGene00223039	0.098940341	-0.141097709	0.092	0.107	1	3	Bm2778	Unannotated
WBGene00234035	0.102219251	-0.196018297	0.516	0.503	1	3	Bma-rpl-10.2	Unannotated
WBGene00225967	0.102860471	0.063022189	0.103	0.089	1	3	Bma-pcbd-1	Unannotated
WBGene00222744	0.102943448	0.04694498	0.137	0.12	1	3	Bma-rpn-3	Unannotated
WBGene00229479	0.103414366	0.08037176	0.103	0.089	1	3	Bm9218	Unannotated
WBGene00220836	0.103708	0.019655707	0.105	0.09	1	3	Bma-mrpl-17	Unannotated
WBGene00234321	0.104919229	-0.057294893	0.193	0.173	1	3	Bma-rps-19.2	Unannotated
WBGene00223735	0.105080105	-0.038254792	0.214	0.193	1	3	Bma-let-765	Unannotated
WBGene00231275	0.105893346	0.052020844	0.116	0.101	1	3	Bm11014	Unannotated
WBGene00225078	0.109678446	-0.050821533	0.162	0.143	1	3	Bma-rnp-7	Unannotated
WBGene00227992	0.109791375	0.01832241	0.102	0.087	1	3	Bma-fkb-1	Unannotated
WBGene00222108	0.110737406	0.064144674	0.127	0.111	1	3	Bm1847	Unannotated
WBGene00229445	0.111107724	0.007846784	0.11	0.094	1	3	Bm9184	Unannotated
WBGene00223543	0.111234525	-0.039861461	0.113	0.098	1	3	Bma-tsn-1	Unannotated
WBGene00222191	0.116713688	-0.099912021	0.119	0.103	1	3	Bma-lmp-1	Unannotated
WBGene00228355	0.117468926	-0.16579767	0.636	0.63	1	3	Bm8094	Unannotated
WBGene00223446	0.119347852	0.022846636	0.144	0.126	1	3	Bma-calu-2	Unannotated
WBGene00224356	0.119469478	0.020226693	0.105	0.091	1	3	Bma-tdp-1.2	Unannotated
WBGene00234155	0.121556141	0.00136281	0.202	0.181	1	3	Bma-rpl-24.2	Unannotated
WBGene00233961	0.121730905	-0.001243182	0.249	0.226	1	3	Bma-ddx-17	Unannotated
WBGene00225613	0.121876491	-0.094944525	0.154	0.135	1	3	Bma-dpf-5	Unannotated
WBGene00227300	0.12229331	-0.011447494	0.173	0.155	1	3	Bma-nxt-1	Unannotated
WBGene00226398	0.1239573	-0.020906245	0.123	0.108	1	3	Bma-unc-37	Unannotated
WBGene00223556	0.124618035	-0.031847957	0.237	0.216	1	3	Bma-repo-1	Unannotated
WBGene00223368	0.125657002	-0.073478924	0.11	0.094	1	3	Bma-hoe-1	Unannotated
WBGene00231182	0.12658475	0.107320055	0.15	0.134	1	3	Bma-tdp-1.3	Unannotated
WBGene00230941	0.126740932	0.054230561	0.112	0.098	1	3	Bm10680	Unannotated
WBGene00223720	0.12748189	0.071240631	0.104	0.091	1	3	Bm3459	Unannotated
WBGene00231627	0.127896711	-0.037277818	0.405	0.373	1	3	Bm11366	Unannotated
WBGene00225493	0.12799054	-0.052313801	0.186	0.165	1	3	Bma-vdac-1	Unannotated
WBGene00225728	0.128853723	-0.325754005	0.116	0.129	1	3	Bma-got-1.2	Unannotated
WBGene00268558	0.129937754	0.131232696	0.111	0.098	1	3	Bm17415	Unannotated
WBGene00223050	0.13216228	-0.080248566	0.136	0.119	1	3	Bma-wnk-1	Unannotated
WBGene00230526	0.132740843	-0.336611788	0.146	0.159	1	3	Bm10265	Unannotated
WBGene00224354	0.133962696	-0.314022922	0.149	0.161	1	3	Bm4093	Unannotated
WBGene00224186	0.134224258	0.087886453	0.112	0.099	1	3	Bma-mob-1	Unannotated
WBGene00222066	0.134501571	0.027676584	0.166	0.15	1	3	Bma-mrpl-41	Unannotated
WBGene00224712	0.13553336	0.064499149	0.165	0.149	1	3	Bm4451	Unannotated
WBGene00234930	0.136091751	-0.010721206	0.103	0.089	1	3	Bm14745	Unannotated
WBGene00234314	0.137252277	-0.018242194	0.236	0.214	1	3	Bma-iscu-1	Unannotated
WBGene00226985	0.137370929	0.025279092	0.165	0.148	1	3	Bm6724	Unannotated
WBGene00228007	0.138605519	-0.092105425	0.187	0.167	1	3	Bm7746	Unannotated
WBGene00230563	0.141855104	-0.239942866	0.536	0.53	1	3	Bm10302	Unannotated
WBGene00220740	0.142536052	0.056444139	0.135	0.121	1	3	Bm479	Unannotated
WBGene00230167	0.143474536	0.03581318	0.109	0.095	1	3	Bm9906	Unannotated
WBGene00222388	0.145033743	-0.123091733	0.114	0.099	1	3	Bma-pezo-1	Unannotated
WBGene00234979	0.145438272	0.093705218	0.127	0.114	1	3	Bm14794	Unannotated
WBGene00233914	0.145849848	-0.045230318	0.676	0.638	1	3	Bm13653	Unannotated
WBGene00228481	0.1459079	0.06023114	0.159	0.143	1	3	Bm8220	Unannotated
WBGene00268573	0.148061077	-0.377492399	0.253	0.261	1	3	Bm17430	Unannotated
WBGene00223779	0.149554964	0.068437659	0.103	0.091	1	3	Bma-nduf-6	Unannotated
WBGene00228684	0.150086733	0.036044451	0.104	0.091	1	3	Bm8423	Unannotated
WBGene00233994	0.150398069	-0.01495166	0.246	0.225	1	3	Bma-eef-2	Unannotated
WBGene00224607	0.150787651	-0.00517769	0.118	0.103	1	3	Bm4346	Unannotated
WBGene00222225	0.152272014	-0.051869806	0.2	0.18	1	3	Bma-hyls-1	Unannotated
WBGene00229489	0.152296668	-0.229918467	0.383	0.387	1	3	Bma-mec-12	Unannotated
WBGene00229344	0.153858699	0.072514937	0.172	0.155	1	3	Bm9083	Unannotated
WBGene00222214	0.154492581	-0.027953098	0.549	0.498	1	3	Bma-rpl-14	Unannotated
WBGene00222671	0.154580237	-0.011018688	0.505	0.463	1	3	Bma-rps-30	Unannotated
WBGene00227855	0.155355422	-0.039205368	0.217	0.196	1	3	Bma-puf-12	Unannotated
WBGene00224994	0.155583646	-0.046678475	0.359	0.333	1	3	Bma-ben-1	Unannotated
WBGene00224229	0.156391326	-0.318573863	0.148	0.16	1	3	Bm3968	Unannotated
WBGene00225577	0.158223594	-0.084880125	0.173	0.154	1	3	Bma-sti-1	Unannotated
WBGene00234281	0.159035557	0.065110299	0.118	0.104	1	3	Bm14020	Unannotated
WBGene00231105	0.159732416	0.029487764	0.101	0.089	1	3	Bm10844	Unannotated
WBGene00224585	0.159950303	0.026549274	0.112	0.098	1	3	Bm4324	Unannotated
WBGene00227554	0.160720164	-0.022867929	0.154	0.137	1	3	Bma-rsp-3.1	Unannotated
WBGene00222349	0.161449799	-0.086602185	0.287	0.261	1	3	Bma-hsp-25	Unannotated
WBGene00234240	0.162067805	-0.059143964	0.143	0.126	1	3	Bm13979	Unannotated
WBGene00225935	0.162808615	-0.304265901	0.137	0.15	1	3	Bma-mrpl-23	Unannotated
WBGene00229718	0.16489113	-0.192822259	0.119	0.104	1	3	Bma-oaz-1	Unannotated
WBGene00224867	0.164900047	-0.136362594	0.114	0.099	1	3	Bma-syd-2	Unannotated
WBGene00225382	0.167139638	-0.062880347	0.372	0.338	1	3	Bm5121	Unannotated
WBGene00223536	0.16727967	-0.016119559	0.111	0.098	1	3	Bm3275	Unannotated
WBGene00226785	0.168282771	-0.090493107	0.165	0.148	1	3	Bma-hrpu-1	Unannotated
WBGene00233091	0.171314863	-0.063799505	0.195	0.176	1	3	Bm12830	Unannotated
WBGene00234347	0.172805572	0.046650508	0.191	0.176	1	3	Bm14086	Unannotated
WBGene00223733	0.177531829	-0.266297038	0.126	0.137	1	3	Bm3472	Unannotated
WBGene00226133	0.177934551	-0.015643874	0.112	0.098	1	3	Bm5872	Unannotated
WBGene00233924	0.177968083	-0.058343859	0.376	0.348	1	3	Bma-hsp-110	Unannotated
WBGene00224566	0.17834217	0.038905806	0.142	0.127	1	3	Bm4305	Unannotated
WBGene00224338	0.178615021	-0.128568743	0.218	0.196	1	3	Bma-nucb-1	Unannotated
WBGene00222814	0.178849377	-0.03946636	0.17	0.153	1	3	Bma-spcs-1	Unannotated
WBGene00234283	0.17969135	-0.196277885	0.281	0.292	1	3	Bm14022	Unannotated
WBGene00224928	0.179741311	0.006520677	0.137	0.122	1	3	Bma-mbf-1	Unannotated
WBGene00226707	0.180775618	-0.144153736	0.108	0.094	1	3	Bma-swt-4	Unannotated
WBGene00234152	0.181543629	0.014702534	0.118	0.105	1	3	Bma-sel-9	Unannotated
WBGene00229478	0.1862182	-0.011859809	0.236	0.217	1	3	Bm9217	Unannotated
WBGene00224891	0.187735061	-0.00036416	0.106	0.093	1	3	Bma-pdi-3	Unannotated
WBGene00225226	0.191466066	-0.042501158	0.113	0.1	1	3	Bma-lpd-6	Unannotated
WBGene00226546	0.191653788	-0.056279806	0.182	0.166	1	3	Bm6285	Unannotated
WBGene00227269	0.193237256	-0.250216369	0.089	0.1	1	3	Bma-kdp-1	Unannotated
WBGene00225886	0.193418358	-0.126802082	0.148	0.132	1	3	Bm5625	Unannotated
WBGene00225072	0.193823919	0.009759315	0.129	0.115	1	3	Bma-ath-1	Unannotated
WBGene00226075	0.194676547	-0.008966921	0.612	0.571	1	3	Bma-ekl-6	Unannotated
WBGene00234164	0.196942192	-0.022538232	0.204	0.188	1	3	Bm13903	Unannotated
WBGene00233942	0.198659509	0.072369674	0.126	0.114	1	3	Bma-paa-1	Unannotated
WBGene00234339	0.198764389	-0.05257691	0.114	0.101	1	3	Bma-ddp-1	Unannotated
WBGene00225546	0.199134082	-0.030550454	0.168	0.152	1	3	Bma-rnp-4	Unannotated
WBGene00225405	0.200039986	-0.240478864	0.364	0.365	1	3	Bma-hil-1	Unannotated
WBGene00234943	0.200670197	-0.115543122	0.183	0.165	1	3	Bm14758	Unannotated
WBGene00225421	0.200715859	-0.095950837	0.213	0.193	1	3	Bm5160	Unannotated
WBGene00229807	0.200978478	-0.251966715	0.157	0.168	1	3	Bm9546	Unannotated
WBGene00224573	0.202094524	0.015190125	0.119	0.106	1	3	Bma-sde-2	Unannotated
WBGene00223269	0.205409194	-0.087507111	0.135	0.12	1	3	Bm3008	Unannotated
WBGene00234029	0.208497637	-0.110413723	0.714	0.685	1	3	Bma-rla-0	Unannotated
WBGene00223999	0.210758811	-0.078472636	0.23	0.211	1	3	Bm3738	Unannotated
WBGene00234023	0.210987874	-0.010884411	0.143	0.129	1	3	Bm13762	Unannotated
WBGene00222976	0.211603237	-0.035141016	0.235	0.217	1	3	Bma-acin-1	Unannotated
WBGene00222546	0.212163393	-0.013031417	0.116	0.104	1	3	Bm2285	Unannotated
WBGene00222909	0.214283443	-0.244930694	0.314	0.316	1	3	Bma-ttr-33	Unannotated
WBGene00225120	0.217125352	-0.046871158	0.226	0.209	1	3	Bm4859	Unannotated
WBGene00226513	0.217344341	-0.094105951	0.141	0.126	1	3	Bma-cox-4	Unannotated
WBGene00234154	0.218394368	-0.003304023	0.505	0.471	1	3	Bma-rpl-24.1	Unannotated
WBGene00234140	0.219648679	0.026052302	0.204	0.187	1	3	Bm13879	Unannotated
WBGene00223802	0.220066948	0.048197009	0.103	0.092	1	3	Bm3541	Unannotated
WBGene00224317	0.220448108	-0.103402565	0.118	0.106	1	3	Bma-urm-1	Unannotated
WBGene00224269	0.220615422	-0.155066079	0.497	0.493	1	3	Bma-elo-5	Unannotated
WBGene00230132	0.221104374	0.054536552	0.126	0.114	1	3	Bm9871	Unannotated
WBGene00222286	0.221941187	-0.042994584	0.173	0.157	1	3	Bma-trxr-1	Unannotated
WBGene00234096	0.224779875	-0.090149566	0.122	0.109	1	3	Bma-atp-2	Unannotated
WBGene00223906	0.225319802	-0.077764307	0.121	0.108	1	3	Bm3645	Unannotated
WBGene00224002	0.225397736	0.060401027	0.122	0.111	1	3	Bma-lsm-4	Unannotated
WBGene00234303	0.227991929	-0.174258868	0.451	0.447	1	3	Bma-rps-5	Unannotated
WBGene00233969	0.228493646	-0.091671174	0.183	0.166	1	3	Bma-cct-2	Unannotated
WBGene00233096	0.228878353	-0.08096103	0.148	0.134	1	3	Bm12835	Unannotated
WBGene00222459	0.231691552	-0.067052302	0.401	0.37	1	3	Bma-rpl-21	Unannotated
WBGene00233959	0.231872268	-0.08136446	0.322	0.295	1	3	Bma-hel-1	Unannotated
WBGene00225130	0.231881735	-0.136964622	0.188	0.17	1	3	Bma-nol-56	Unannotated
WBGene00227210	0.232560261	0.008652195	0.258	0.241	1	3	Bm6949	Unannotated
WBGene00223374	0.233015506	0.029566202	0.1	0.09	1	3	Bma-mog-5	Unannotated
WBGene00230507	0.233422161	-0.054992815	0.11	0.098	1	3	Bma-heh-1	Unannotated
WBGene00222676	0.233740124	-0.056822721	0.13	0.117	1	3	Bma-wdfy-3	Unannotated
WBGene00222878	0.234264256	0.00017476	0.119	0.107	1	3	Bm2617	Unannotated
WBGene00224716	0.235977093	-0.272166663	0.11	0.12	1	3	Bm4455	Unannotated
WBGene00225664	0.235981321	-0.087813143	0.158	0.143	1	3	Bm5403	Unannotated
WBGene00225902	0.237589138	-0.224199732	0.14	0.151	1	3	Bma-nex-2	Unannotated
WBGene00230451	0.241980073	-0.157330985	0.213	0.193	1	3	Bm10190	Unannotated
WBGene00227700	0.24262983	0.017664814	0.247	0.229	1	3	Bma-nol-16	Unannotated
WBGene00228006	0.246887282	-0.065084282	0.106	0.094	1	3	Bm7745	Unannotated
WBGene00223948	0.248169449	-0.034197584	0.146	0.133	1	3	Bma-mrps-21	Unannotated
WBGene00225821	0.249290913	-0.123238244	0.132	0.119	1	3	Bm5560	Unannotated
WBGene00225233	0.249681376	-0.062848802	0.243	0.223	1	3	Bma-spc-1	Unannotated
WBGene00229798	0.249902777	-0.092251904	0.169	0.154	1	3	Bma-npp-14	Unannotated
WBGene00223825	0.251835403	-0.025574159	0.384	0.358	1	3	Bma-ubq-1	Unannotated
WBGene00224533	0.252027338	-0.116424563	0.19	0.173	1	3	Bm4272	Unannotated
WBGene00224304	0.252371231	-0.063513139	0.168	0.154	1	3	Bma-ess-2	Unannotated
WBGene00233217	0.257603638	-0.133815881	0.189	0.172	1	3	Bm12956	Unannotated
WBGene00228657	0.2591256	-0.015971903	0.17	0.156	1	3	Bm8396	Unannotated
WBGene00226499	0.259126507	0.0604895	0.104	0.093	1	3	Bm6238	Unannotated
WBGene00225841	0.259291097	-0.031855723	0.131	0.118	1	3	Bma-aldo-1	Unannotated
WBGene00225580	0.260163861	-0.1049028	0.143	0.128	1	3	Bma-nhr-1	Unannotated
WBGene00226354	0.261066703	-0.007919204	0.151	0.139	1	3	Bma-nuo-6	Unannotated
WBGene00227390	0.262664601	-0.072933859	0.19	0.175	1	3	Bma-lgc-27	Unannotated
WBGene00227803	0.263253938	-0.060904264	0.128	0.117	1	3	Bma-xpo-1	Unannotated
WBGene00225860	0.264258506	-0.021646698	0.103	0.092	1	3	Bm5599	Unannotated
WBGene00231055	0.264648774	-0.043782623	0.183	0.168	1	3	Bma-iffb-1	Unannotated
WBGene00226777	0.265731299	-0.281298019	0.106	0.114	1	3	Bma-set-23	Unannotated
WBGene00222982	0.265906224	-0.203146754	0.345	0.345	1	3	Bm2721	Unannotated
WBGene00227460	0.266564444	-0.188259189	0.139	0.148	1	3	Bm7199	Unannotated
WBGene00234289	0.267504793	-0.095370525	0.859	0.825	1	3	Bma-rpl-16	Unannotated
WBGene00225839	0.268027108	-0.047330094	0.315	0.292	1	3	Bma-cct-1	Unannotated
WBGene00268616	0.26901384	-0.099361324	0.163	0.148	1	3	Bma-ttr-31	Unannotated
WBGene00234032	0.269927058	-0.170255701	0.539	0.522	1	3	Bma-rpl-20	Unannotated
WBGene00227404	0.270756618	-0.108365533	0.632	0.61	1	3	Bm7143	Unannotated
WBGene00229357	0.271683747	-0.05093318	0.114	0.102	1	3	Bma-figl-1	Unannotated
WBGene00234310	0.274667539	-0.024790975	0.762	0.697	1	3	Bma-rps-7	Unannotated
WBGene00223552	0.275262923	-0.068554235	0.16	0.146	1	3	Bma-eif-2Bdelta	Unannotated
WBGene00233190	0.27561267	-0.204725287	0.329	0.337	1	3	Bma-rps-19.1	Unannotated
WBGene00226673	0.276467714	-0.241324686	0.209	0.218	1	3	Bma-crt-1	Unannotated
WBGene00227903	0.277014641	0.071159908	0.122	0.112	1	3	Bm7642	Unannotated
WBGene00234070	0.281151212	-0.025609767	0.233	0.216	1	3	Bm13809	Unannotated
WBGene00227461	0.282280057	-0.046522011	0.226	0.211	1	3	Bma-ubxn-2	Unannotated
WBGene00223323	0.288640011	0.02851176	0.184	0.173	1	3	Bma-ppfr-2	Unannotated
WBGene00229733	0.292498054	-0.067556451	0.117	0.106	1	3	Bm9472	Unannotated
WBGene00225383	0.292904269	-0.023616162	0.102	0.092	1	3	Bm5122	Unannotated
WBGene00235048	0.293487926	-0.036176805	0.368	0.348	1	3	Bm14713	Unannotated
WBGene00226830	0.294749061	-0.164617308	0.189	0.173	1	3	Bma-lact-9	Unannotated
WBGene00234299	0.29572245	0.043083375	0.12	0.11	1	3	Bma-hint-1	Unannotated
WBGene00227218	0.29778193	-0.04955269	0.25	0.232	1	3	Bm6957	Unannotated
WBGene00224146	0.300794088	-0.006869983	0.127	0.116	1	3	Bma-isw-1	Unannotated
WBGene00233937	0.300930365	-0.038419647	0.187	0.174	1	3	Bma-pas-7	Unannotated
WBGene00226436	0.302119642	-0.108852654	0.128	0.116	1	3	Bma-ints-4	Unannotated
WBGene00234306	0.302734115	-0.067460872	0.528	0.487	1	3	Bma-rps-9	Unannotated
WBGene00234320	0.304395544	-0.096344797	0.78	0.74	1	3	Bma-rps-12	Unannotated
WBGene00234274	0.30568588	-0.112570284	0.172	0.158	1	3	Bm14013	Unannotated
WBGene00230576	0.307349992	-0.088887851	0.222	0.205	1	3	Bm10315	Unannotated
WBGene00234042	0.308040658	-0.11879005	0.243	0.223	1	3	Bma-ndk-1	Unannotated
WBGene00224800	0.308793361	-0.099871052	0.1	0.091	1	3	Bma-rpac-19	Unannotated
WBGene00225720	0.309784722	-0.052198916	0.197	0.183	1	3	Bm5459	Unannotated
WBGene00226209	0.312176945	-0.070922526	0.146	0.135	1	3	Bma-eif-3.C	Unannotated
WBGene00224807	0.314898862	-0.049964383	0.162	0.149	1	3	Bm4546	Unannotated
WBGene00224360	0.315799647	-0.024526412	0.182	0.17	1	3	Bm4099	Unannotated
WBGene00224995	0.31792946	-0.031983118	0.116	0.105	1	3	Bm4734	Unannotated
WBGene00225639	0.320347198	-0.003494334	0.291	0.273	1	3	Bma-rpl-9	Unannotated
WBGene00223024	0.321713378	-0.30667059	0.122	0.129	1	3	Bma-ubr-4	Unannotated
WBGene00255590	0.322942922	0.037064957	0.139	0.129	1	3	Bma-dss-1	Unannotated
WBGene00223896	0.323256267	-0.100504384	0.113	0.102	1	3	Bma-ttm-2	Unannotated
WBGene00222688	0.324431277	-0.164655387	0.101	0.091	1	3	Bma-rad-26	Unannotated
WBGene00227648	0.328679131	-0.07673368	0.199	0.183	1	3	Bma-cha-1	Unannotated
WBGene00222624	0.328900236	-0.042475994	0.159	0.147	1	3	Bma-ajm-1	Unannotated
WBGene00226778	0.330327191	-0.089959663	0.16	0.148	1	3	Bma-ced-2	Unannotated
WBGene00233982	0.331107416	-0.109799448	0.645	0.615	1	3	Bma-rps-14	Unannotated
WBGene00220688	0.331720726	-0.066764439	0.357	0.336	1	3	Bm427	Unannotated
WBGene00224922	0.331996442	-0.089409821	0.133	0.121	1	3	Bma-athp-2	Unannotated
WBGene00224021	0.332461508	-0.175660589	0.245	0.251	1	3	Bma-fipp-1	Unannotated
WBGene00222277	0.332953097	-0.065268614	0.158	0.145	1	3	Bm2016	Unannotated
WBGene00222415	0.333601917	-0.140848662	0.179	0.164	1	3	Bma-taf-3	Unannotated
WBGene00224012	0.337173415	-0.042141288	0.157	0.146	1	3	Bm3751	Unannotated
WBGene00224855	0.341151625	0.011341029	0.156	0.145	1	3	Bma-cyn-4	Unannotated
WBGene00226887	0.343997099	-0.056457559	0.11	0.101	1	3	Bma-lpd-3	Unannotated
WBGene00233979	0.344798667	-0.139009846	0.441	0.441	1	3	Bm13718	Unannotated
WBGene00227403	0.345788695	-0.080503388	0.114	0.105	1	3	Bm7142	Unannotated
WBGene00224965	0.349880185	-0.139630213	0.661	0.628	1	3	Bma-rpl-12	Unannotated
WBGene00223259	0.350869657	-0.007286889	0.54	0.513	1	3	Bma-rps-10	Unannotated
WBGene00224584	0.352155798	-0.006051429	0.518	0.488	1	3	Bma-rpl-7	Unannotated
WBGene00224191	0.352720683	-0.03511461	0.36	0.339	1	3	Bma-rps-26	Unannotated
WBGene00222580	0.356312255	-0.148853245	0.193	0.179	1	3	Bma-fln-2	Unannotated
WBGene00223762	0.360915255	-0.119349229	0.159	0.147	1	3	Bma-tpp-2	Unannotated
WBGene00223600	0.36185862	0.02664637	0.112	0.104	1	3	Bma-ldh-1	Unannotated
WBGene00225369	0.36333573	-0.068909887	0.108	0.099	1	3	Bma-let-70.2	Unannotated
WBGene00234142	0.364675085	-0.071557001	0.111	0.102	1	3	Bma-mog-2	Unannotated
WBGene00230220	0.365921138	0.001930794	0.653	0.624	1	3	Bma-rps-23.1	Unannotated
WBGene00225141	0.367801923	-0.046824337	0.144	0.134	1	3	Bm4880	Unannotated
WBGene00234109	0.371104242	0.019326983	0.126	0.117	1	3	Bm13848	Unannotated
WBGene00223494	0.371599873	0.012694358	0.113	0.104	1	3	Bm3233	Unannotated
WBGene00222643	0.371605452	-0.093973063	0.182	0.169	1	3	Bma-mdt-26	Unannotated
WBGene00227738	0.373577211	0.002980784	0.387	0.37	1	3	Bm7477	Unannotated
WBGene00230202	0.373701933	-0.218954828	0.173	0.181	1	3	Bm9941	Unannotated
WBGene00223894	0.376529229	-0.016105482	0.197	0.185	1	3	Bm3633	Unannotated
WBGene00234976	0.383426899	-0.107949057	0.159	0.148	1	3	Bma-nft-1	Unannotated
WBGene00224505	0.38593549	-0.043510406	0.158	0.147	1	3	Bma-nmy-1	Unannotated
WBGene00225468	0.388950783	-0.146950291	0.103	0.094	1	3	Bm5207	Unannotated
WBGene00233980	0.389349167	-0.03054739	0.569	0.531	1	3	Bma-rps-13	Unannotated
WBGene00232819	0.389782371	-0.028841602	0.139	0.128	1	3	Bm12558	Unannotated
WBGene00234315	0.393232457	-0.274497128	0.16	0.166	1	3	Bma-spcs-3	Unannotated
WBGene00220707	0.395647171	-0.007134799	0.648	0.615	1	3	Bm446	Unannotated
WBGene00229308	0.395741929	-0.045741157	0.164	0.154	1	3	Bm9047	Unannotated
WBGene00226565	0.396095727	-0.225487625	0.159	0.165	1	3	Bm6304	Unannotated
WBGene00223780	0.396730696	-0.148786589	0.146	0.135	1	3	Bma-prpf-4	Unannotated
WBGene00227848	0.398169514	-0.011882488	0.168	0.157	1	3	Bm7587	Unannotated
WBGene00222412	0.400242935	-0.013430348	0.159	0.149	1	3	Bm2151	Unannotated
WBGene00234039	0.400622633	-0.157543895	0.093	0.1	1	3	Bm13778	Unannotated
WBGene00223285	0.402579256	-0.163998607	0.093	0.1	1	3	Bma-cdc-5L	Unannotated
WBGene00225008	0.402669367	-0.02946781	0.671	0.632	1	3	Bma-rps-25	Unannotated
WBGene00229305	0.403686375	-0.32177952	0.151	0.156	1	3	Bm9044	Unannotated
WBGene00225131	0.404119866	0.019640014	0.142	0.133	1	3	Bma-sluh-7	Unannotated
WBGene00222321	0.404390463	-0.094011316	0.118	0.109	1	3	Bma-cux-7	Unannotated
WBGene00220753	0.404721082	-0.115420016	0.139	0.13	1	3	Bm492	Unannotated
WBGene00226784	0.405048914	-0.165173599	0.177	0.183	1	3	Bm6523	Unannotated
WBGene00233938	0.406982318	-0.096150234	0.161	0.15	1	3	Bma-pbs-7	Unannotated
WBGene00223937	0.40783671	-0.067879202	0.116	0.107	1	3	Bma-rsr-1	Unannotated
WBGene00227356	0.408275369	-0.124390245	0.651	0.617	1	3	Bma-sqd-1	Unannotated
WBGene00234046	0.413438389	-0.073493952	0.379	0.36	1	3	Bma-abcf-2	Unannotated
WBGene00222129	0.413549135	-0.251754632	0.169	0.175	1	3	Bm1868	Unannotated
WBGene00221975	0.413918068	-0.077397748	0.156	0.147	1	3	Bm1714	Unannotated
WBGene00269368	0.415103123	-0.081810709	0.152	0.141	1	3	Bma-pas-1	Unannotated
WBGene00227351	0.416395916	-0.106156312	0.109	0.101	1	3	Bma-fard-1	Unannotated
WBGene00230268	0.418019328	-0.030944251	0.126	0.118	1	3	Bm10007	Unannotated
WBGene00227249	0.419132884	-0.007334286	0.216	0.205	1	3	Bm6988	Unannotated
WBGene00233925	0.422055668	-0.061897248	0.258	0.243	1	3	Bma-eif-3.G	Unannotated
WBGene00230764	0.422628252	-0.076602509	0.314	0.297	1	3	Bm10503	Unannotated
WBGene00224217	0.422782595	-0.006371237	0.106	0.099	1	3	Bma-mage-1	Unannotated
WBGene00224436	0.424319393	-0.070013908	0.286	0.269	1	3	Bm4175	Unannotated
WBGene00222993	0.424364843	-0.190361335	0.114	0.12	1	3	Bm2732	Unannotated
WBGene00230969	0.424623282	0.05855119	0.118	0.111	1	3	Bma-ztf-18.2	Unannotated
WBGene00227965	0.425843259	-0.129133523	0.119	0.109	1	3	Bma-xrn-2	Unannotated
WBGene00234131	0.426073899	-0.106151003	0.129	0.118	1	3	Bma-rpn-8	Unannotated
WBGene00224701	0.430020922	-0.123495187	0.151	0.141	1	3	Bm4440	Unannotated
WBGene00233045	0.431073385	-0.163790656	0.104	0.11	1	3	Bma-men-1.1	Unannotated
WBGene00222906	0.433338809	-0.072785912	0.128	0.119	1	3	Bma-txt-5	Unannotated
WBGene00226819	0.433391519	-0.105782474	0.134	0.125	1	3	Bm6558	Unannotated
WBGene00230317	0.433834671	-0.089856392	0.158	0.149	1	3	Bm10056	Unannotated
WBGene00224633	0.439635916	-0.081386964	0.113	0.104	1	3	Bma-rbc-1	Unannotated
WBGene00232369	0.440401659	-0.043022718	0.624	0.586	1	3	Bma-cri-3	Unannotated
WBGene00222114	0.446860031	-0.088687183	0.111	0.102	1	3	Bma-exos-4.1	Unannotated
WBGene00225396	0.446950948	-0.119686876	0.1	0.107	1	3	Bma-ifg-1	Unannotated
WBGene00224124	0.448488939	-0.089953675	0.115	0.106	1	3	Bma-ubr-5	Unannotated
WBGene00225742	0.449351745	-0.055150398	0.104	0.096	1	3	Bma-klp-12	Unannotated
WBGene00227137	0.453207501	0.045456976	0.101	0.095	1	3	Bma-npp-16	Unannotated
WBGene00226831	0.455468146	-0.089594971	0.713	0.679	1	3	Bma-rpl-18	Unannotated
WBGene00228781	0.457184113	0.128801241	0.103	0.098	1	3	Bm8520	Unannotated
WBGene00229735	0.462785961	-0.058506932	0.164	0.154	1	3	Bm9474	Unannotated
WBGene00229763	0.466171753	-0.198043857	0.125	0.116	1	3	Bma-hsp-43	Unannotated
WBGene00234330	0.467909573	-0.130709274	0.115	0.107	1	3	Bm14069	Unannotated
WBGene00223328	0.468781223	-0.047634662	0.402	0.38	1	3	Bma-nap-1	Unannotated
WBGene00221966	0.469362955	-0.057381362	0.377	0.356	1	3	Bma-kin-3	Unannotated
WBGene00233160	0.469460704	-0.062362041	0.121	0.114	1	3	Bm12899	Unannotated
WBGene00228106	0.470767268	-0.104122107	0.109	0.101	1	3	Bm7845	Unannotated
WBGene00222465	0.476966424	-0.041084758	0.106	0.099	1	3	Bma-sfxn-2	Unannotated
WBGene00234236	0.477308967	-0.124999556	0.157	0.148	1	3	Bma-map-1	Unannotated
WBGene00226616	0.478447988	-0.006833586	0.108	0.101	1	3	Bma-szy-2	Unannotated
WBGene00222599	0.481029761	-0.239865129	0.107	0.112	1	3	Bm2338	Unannotated
WBGene00227873	0.481912861	-0.172506683	0.168	0.156	1	3	Bma-ccdc-47	Unannotated
WBGene00224389	0.482383525	-0.067687569	0.433	0.407	1	3	Bma-ned-8	Unannotated
WBGene00230691	0.482607966	-0.209480877	0.113	0.118	1	3	Bma-crn-5	Unannotated
WBGene00223487	0.487858481	-0.152959204	0.425	0.42	1	3	Bma-prdx-2	Unannotated
WBGene00234104	0.489569781	-0.300119701	0.166	0.169	1	3	Bm13843	Unannotated
WBGene00227526	0.489695906	-0.093647009	0.106	0.099	1	3	Bm7265	Unannotated
WBGene00222220	0.491222544	-0.02448439	0.116	0.109	1	3	Bma-mog-4	Unannotated
WBGene00234270	0.491795353	-0.161529204	0.128	0.134	1	3	Bm14009	Unannotated
WBGene00224008	0.493678592	-0.045377606	0.115	0.108	1	3	Bma-metl-17	Unannotated
WBGene00223135	0.493679198	-0.031924113	0.171	0.162	1	3	Bm2874	Unannotated
WBGene00225275	0.494466247	-0.042145005	0.237	0.224	1	3	Bm5014	Unannotated
WBGene00230956	0.500870573	-0.03959523	0.217	0.206	1	3	Bma-akap-1	Unannotated
WBGene00233921	0.501619497	-0.175343779	0.11	0.115	1	3	Bm13660	Unannotated
WBGene00225896	0.502128056	-0.033897292	0.164	0.157	1	3	Bm5635	Unannotated
WBGene00222974	0.503762495	-0.184063556	0.29	0.271	1	3	Bma-apl-1	Unannotated
WBGene00233967	0.504390521	-0.230999679	0.106	0.11	1	3	Bma-cct-7	Unannotated
WBGene00234176	0.505793071	-0.133320095	0.238	0.224	1	3	Bma-lsm-8	Unannotated
WBGene00226935	0.514948391	-0.113959175	0.643	0.607	1	3	Bma-rpl-17	Unannotated
WBGene00233949	0.517618668	-0.057559553	0.449	0.428	1	3	Bma-rack-1	Unannotated
WBGene00226012	0.517906168	-0.228872747	0.116	0.12	1	3	Bma-drp-1	Unannotated
WBGene00234017	0.527932997	0.037058346	0.102	0.096	1	3	Bm13756	Unannotated
WBGene00223816	0.52852461	-0.175410363	0.214	0.219	1	3	Bm3555	Unannotated
WBGene00225588	0.529768978	-0.184689123	0.103	0.107	1	3	Bm5327	Unannotated
WBGene00227084	0.533900091	-0.030815688	0.103	0.097	1	3	Bma-manf-1	Unannotated
WBGene00223220	0.534704205	-0.037649745	0.162	0.154	1	3	Bm2959	Unannotated
WBGene00268224	0.534926623	-0.062550273	0.099	0.105	1	3	Bma-zhit-1	Unannotated
WBGene00226727	0.536263441	-0.137274253	0.115	0.108	1	3	Bm6466	Unannotated
WBGene00223479	0.536483371	-0.028991344	0.182	0.174	1	3	Bm3218	Unannotated
WBGene00227000	0.538322796	-0.032531141	0.145	0.138	1	3	Bma-dxbp-1	Unannotated
WBGene00221940	0.539171851	-0.047753907	0.273	0.259	1	3	Bma-trx-2	Unannotated
WBGene00223692	0.539773237	-0.125996201	0.116	0.108	1	3	Bma-utp-20	Unannotated
WBGene00224272	0.541191691	-0.053370512	0.149	0.142	1	3	Bm4011	Unannotated
WBGene00226956	0.541258838	-0.135032641	0.111	0.104	1	3	Bma-pstk-1	Unannotated
WBGene00224258	0.543721896	0.017777113	0.11	0.104	1	3	Bma-vps-60	Unannotated
WBGene00221236	0.548677951	-0.123714773	0.108	0.101	1	3	Bm975	Unannotated
WBGene00232565	0.550852993	-0.179792156	0.142	0.133	1	3	Bm12304	Unannotated
WBGene00226908	0.554207383	-0.147362544	0.429	0.423	1	3	Bma-mrpl-20	Unannotated
WBGene00222977	0.560401393	-0.094866983	0.104	0.098	1	3	Bm2716	Unannotated
WBGene00224273	0.560851241	-0.083689685	0.193	0.183	1	3	Bma-hrpa-1.2	Unannotated
WBGene00226568	0.560880541	-0.064960336	0.22	0.211	1	3	Bm6307	Unannotated
WBGene00227295	0.560894962	-0.081561365	0.54	0.506	1	3	Bma-rpl-1	Unannotated
WBGene00234963	0.565622718	-0.162504733	0.184	0.174	1	3	Bma-hip-1	Unannotated
WBGene00229365	0.567016514	-0.170719728	0.33	0.327	1	3	Bm9104	Unannotated
WBGene00231168	0.570426901	-0.078472594	0.112	0.105	1	3	Bm10907	Unannotated
WBGene00234298	0.573478724	-0.188737193	0.198	0.201	1	3	Bma-pno-1	Unannotated
WBGene00226991	0.575707322	-0.05106694	0.202	0.194	1	3	Bma-alkb-1	Unannotated
WBGene00227150	0.577153119	-0.109929398	0.206	0.196	1	3	Bma-pqn-87	Unannotated
WBGene00234011	0.58082843	-0.084446749	0.225	0.215	1	3	Bma-cnx-1	Unannotated
WBGene00223325	0.587297168	-0.070744394	0.104	0.099	1	3	Bma-maco-1	Unannotated
WBGene00229892	0.589354426	-0.151948104	0.104	0.109	1	3	Bm9631	Unannotated
WBGene00225980	0.591034526	-0.17828793	0.108	0.101	1	3	Bma-eea-1	Unannotated
WBGene00222044	0.593519521	-0.122939459	0.633	0.593	1	3	Bma-rps-0	Unannotated
WBGene00229896	0.593566302	-0.115129078	0.123	0.118	1	3	Bma-rsp-3.3	Unannotated
WBGene00304241	0.599054443	0.005034586	0.158	0.152	1	3	Bm18583	Unannotated
WBGene00269277	0.599215098	-0.111776289	0.127	0.121	1	3	Bm18137	Unannotated
WBGene00224103	0.600167491	-0.103440674	0.107	0.101	1	3	Bma-marb-1	Unannotated
WBGene00228455	0.602754217	-0.05261208	0.195	0.188	1	3	Bma-dph-1	Unannotated
WBGene00225835	0.603194393	-0.120136005	0.168	0.159	1	3	Bma-dnj-19	Unannotated
WBGene00234579	0.605202663	-0.046936399	0.112	0.107	1	3	Bma-swp-1	Unannotated
WBGene00224383	0.607142214	-0.165278398	0.131	0.124	1	3	Bma-gei-1	Unannotated
WBGene00229501	0.611621839	-0.137658139	0.128	0.122	1	3	Bm9240	Unannotated
WBGene00226678	0.611622218	-0.166900795	0.218	0.221	1	3	Bma-prdx-6	Unannotated
WBGene00223112	0.615517667	-0.171669707	0.207	0.209	1	3	Bm2851	Unannotated
WBGene00221994	0.62124624	-0.044875054	0.122	0.117	1	3	Bm1733	Unannotated
WBGene00234950	0.62281324	-0.133538796	0.21	0.201	1	3	Bm14765	Unannotated
WBGene00234040	0.624959248	-0.058008008	0.728	0.702	1	3	Bma-rpl-32	Unannotated
WBGene00234118	0.627918707	-0.042717484	0.181	0.175	1	3	Bm13857	Unannotated
WBGene00234099	0.628315905	-0.056812724	0.104	0.099	1	3	Bma-adss-1	Unannotated
WBGene00225805	0.628826394	-0.143258768	0.11	0.104	1	3	Bma-act-5	Unannotated
WBGene00223009	0.631107703	-0.115156226	0.305	0.292	1	3	Bm2748	Unannotated
WBGene00226560	0.632805412	-0.137537794	0.12	0.125	1	3	Bm6299	Unannotated
WBGene00233958	0.635539171	-0.08043997	0.167	0.16	1	3	Bm13697	Unannotated
WBGene00226522	0.635808126	-0.203029004	0.133	0.135	1	3	Bm6261	Unannotated
WBGene00234119	0.637205985	-0.132478206	0.112	0.106	1	3	Bma-arx-3	Unannotated
WBGene00222265	0.642739628	-0.004887387	0.193	0.188	1	3	Bm2004	Unannotated
WBGene00227900	0.644269164	-0.241471045	0.12	0.122	1	3	Bma-vab-10	Unannotated
WBGene00226255	0.656271927	-0.012702038	0.135	0.13	1	3	Bma-dnj-23	Unannotated
WBGene00225565	0.660879126	-0.248459364	0.12	0.122	1	3	Bm5304	Unannotated
WBGene00269280	0.663339021	-0.04116155	0.134	0.129	1	3	Bm18140	Unannotated
WBGene00234216	0.663949031	-0.158431668	0.169	0.171	1	3	Bma-nol-58	Unannotated
WBGene00233181	0.665349948	-0.094941229	0.591	0.546	1	3	Bm12920	Unannotated
WBGene00269265	0.667333726	-0.001587375	0.096	0.1	1	3	Bma-nst-1	Unannotated
WBGene00231253	0.670866947	-0.179296914	0.1	0.104	1	3	Bm10992	Unannotated
WBGene00223467	0.67256894	-0.098070941	0.761	0.714	1	3	Bm3206	Unannotated
WBGene00227441	0.680506236	-0.130656423	0.1	0.103	1	3	Bma-uaf-1	Unannotated
[truncated: 18,728 more rows]
